# Supplementary material for: Large-scale genome analysis of bovine commensal Escherichia coli reveals that bovine-adapted E. coli lineages are serving as evolutionary sources of the emergence of human intestinal pathogenic strains
Source: HighWire-hosted journal article supplement (doi:10.1101/gr.249268.119), 2019-08-22
Supplement: Supplemental_Tables.xlsx [file Supplemental_Tables.xlsx]

## Sheet: Supple Table S1
Supplemental table S1. Characteristics of strains sequenced in this study
Strain_name	Year of isolation	Country	Host	Source	pathotype	Phylogroup	O serogroup	H serogroup	ST	stx1	stx2	eaeA	Symptom	Accession no.
HH-NP001	2014	Japan	bovine	feces	commensal	A	Gp8	H54	10	-	-	-	-	DRR102638	BFJP01000000
HH-NP002	2014	Japan	bovine	feces	commensal	A	O37	H4	398	-	-	-	-	DRR102639	BFJQ01000000
HH-NP005	2014	Japan	bovine	feces	commensal	D	O133	H29	1204	-	-	-	-	DRR102641	BFJS01000000
HH-NP006	2014	Japan	bovine	feces	commensal	A	O9	H30	1294	-	-	-	-	DRR102642	BFJT01000000
HH-NP007	2014	Japan	bovine	feces	commensal	B1	O110	H2	187	-	-	-	-	DRR102643	BFJU01000000
HH-NP008	2014	Japan	bovine	feces	commensal	B1	O108var1	H2	847	-	-	-	-	DRR102644	BFJV01000000
HH-NP010	2014	Japan	bovine	feces	commensal	B1	O48	H7	1423	-	-	-	-	DRR102645	BFJW01000000
HH-NP013	2014	Japan	bovine	feces	commensal	E	O138	H48	219	-	-	-	-	DRR102646	BFJX01000000
HH-NP014	2014	Japan	bovine	feces	commensal	B1	Gp12	H7	ND	-	-	-	-	DRR102647	BFJY01000000
HH-NP015	2014	Japan	bovine	feces	commensal	B1	O6	H49	1079	-	-	-	-	DRR102648	BFJZ01000000
HH-NP016	2014	Japan	bovine	feces	commensal	B1	O7	H8	26	-	-	-	-	DRR102649	BFKA01000000
HH-NP022	2014	Japan	bovine	feces	commensal	B1	O3	H19	201	-	-	-	-	DRR102650	BFKB01000000
HH-NP023	2014	Japan	bovine	feces	commensal	B1	O22	H7	ND	-	-	-	-	DRR102651	BFKC01000000
HH-NP024	2014	Japan	bovine	feces	commensal	B1	O8	H21	345	-	-	-	-	DRR102652	BFKD01000000
HH-NP029	2014	Japan	bovine	feces	commensal	B1	O45	H19	5236	-	-	-	-	DRR102654	BFKF01000000
HH-NP031	2014	Japan	bovine	feces	commensal	B1	O157	H19	763	-	-	-	-	DRR102655	BFKG01000000
HH-NP033	2014	Japan	bovine	feces	commensal	E	Gp3	H28	ND	-	-	-	-	DRR102656	BFKH01000000
HH-P001	2014	Japan	bovine	feces	commensal	A	Gp7	H27	10	-	stx2a	-	-	DRR102657	BFKI01000000
HH-P003	2014	Japan	bovine	feces	commensal	B1	O103	H2	376	-	-	epsilon1	-	DRR102658	BFKJ01000000
HH-P005	2014	Japan	bovine	feces	commensal	B1	Gp11	H19	205	-	stx2a	-	-	DRR102659	BFKK01000000
HH-P006	2014	Japan	bovine	feces	commensal	B1	O184	H48	1172	-	-	-	-	DRR102660	BFKL01000000
HH-P007	2014	Japan	bovine	feces	commensal	B1	O163	H19	679	-	stx2a	-	-	DRR102661	BFKM01000000
HH-P011	2014	Japan	bovine	feces	commensal	B1	Onovel21	H2	5973	-	stx2a,c/d	-	-	DRR102662	BFKN01000000
HH-P012	2014	Japan	bovine	feces	commensal	B1	O8	H8	5937	-	stx2a,c/d	-	-	DRR102663	BFKO01000000
HH-P013	2014	Japan	bovine	feces	commensal	B1	O26	H11	ND	-	-	beta1	-	DRR102664	BFKP01000000
HH-P016	2014	Japan	bovine	feces	commensal	B1	O74	H8	ND	stx1a	stx2a,c/d	-	-	DRR102665	BFKQ01000000
HH-P019	2014	Japan	bovine	feces	commensal	UT	O9_wzm/wzt_Gp11_wzx/wzy	H30	1294	-	stx2a	-	-	DRR102666	BFKR01000000
HH-P022	2014	Japan	bovine	feces	commensal	A	O49	H10	ND	-	-	kappa	-	DRR102667	BFKS01000000
HH-P025	2014	Japan	bovine	feces	commensal	B1	UT	H2	2008	-	stx2a	-	-	DRR102668	BFKT01000000
HH-P033	2014	Japan	bovine	feces	commensal	B1	O15	H27	2388	-	stx2c/d	-	-	DRR102669	BFKU01000000
HH-P034	2014	Japan	bovine	feces	commensal	B1	UT	H19	205	-	stx2a	-	-	DRR102670	BFKV01000000
HH-P044	2014	Japan	bovine	feces	commensal	B1	O113	H21	56	-	stx2c/d	-	-	DRR102671	BFKW01000000
HH-P054	2014	Japan	bovine	feces	commensal	A	O177	H25	342	-	stx2c/d	beta1	-	DRR102672	BFKX01000000
HH-P056	2014	Japan	bovine	feces	commensal	A	O109	H48	8355	stx1a	-	-	-	DRR102673	BFKY01000000
KK-NP001	2014	Japan	bovine	feces	commensal	B1	Onovel27	H16	336	-	-	-	-	DRR102954	BFVS01000000
KK-NP002	2014	Japan	bovine	feces	commensal	A	O153var1	H25	3489	-	-	-	-	DRR102955	BFVT01000000
KK-NP003	2014	Japan	bovine	feces	commensal	B1	O116	H8	ND	-	-	-	-	DRR102956	BFVU01000000
KK-NP004	2014	Japan	bovine	feces	commensal	B1	O54	H28	5552	-	-	-	-	DRR102957	BFVV01000000
KK-NP005	2014	Japan	bovine	feces	commensal	D	O7	H18	38?	-	-	-	-	DRR102958	BFVW01000000
KK-NP006	2014	Japan	bovine	feces	commensal	A	O163	H23	939	-	-	-	-	DRR102959	BFVX01000000
KK-NP007	2014	Japan	bovine	feces	commensal	B1	O141	H16	1723?	-	-	-	-	DRR102960	BFVY01000000
KK-NP008	2014	Japan	bovine	feces	commensal	B1	O29	H9	2480?	-	-	-	-	DRR102961	BFVZ01000000
KK-NP009	2014	Japan	bovine	feces	commensal	B1	O8	H2	5738*	-	-	-	-	DRR102962	BFWA01000000
KK-NP010	2014	Japan	bovine	feces	commensal	B1	O108var1	H35	847	-	-	-	-	DRR102963	BFWB01000000
KK-NP011	2014	Japan	bovine	feces	commensal	E	O15	H45	118	-	-	-	-	DRR102964	BFWC01000000
KK-NP012	2014	Japan	bovine	feces	commensal	B1	UT	H28	4038	-	-	-	-	DRR102965	BFWD01000000
KK-NP013	2014	Japan	bovine	feces	commensal	B1	O91	H7	1304	-	-	-	-	DRR102966	BFWE01000000
KK-NP014	2014	Japan	bovine	feces	commensal	B1	UT	H38	154	-	-	-	-	DRR102967	BFWF01000000
KK-NP015	2014	Japan	bovine	feces	commensal	B1	O102	H21	155	-	-	-	-	DRR102968	BFWG01000000
KK-NP016	2014	Japan	bovine	feces	commensal	B1	UT	H8	13	-	-	-	-	DRR102969	BFWH01000000
KK-NP017	2014	Japan	bovine	feces	commensal	B1	UT	H2	7895	-	-	-	-	DRR102970	BFWI01000000
KK-NP018	2014	Japan	bovine	feces	commensal	B1	Onovel27	H8	164	-	-	-	-	DRR102971	BFWJ01000000
KK-NP019	2014	Japan	bovine	feces	commensal	E	Onovel3	H20	691	-	-	-	-	DRR102972	BFWK01000000
KK-NP020	2014	Japan	bovine	feces	commensal	B1	Onovel27	H8	6488	-	-	-	-	DRR102973	BFWL01000000
KK-NP021	2014	Japan	bovine	feces	commensal	B1	UT	H7	7894	-	-	-	-	DRR102974	BFWM01000000
KK-NP022	2014	Japan	bovine	feces	commensal	B1	O150	H8	7893	-	-	-	-	DRR102975	BFWN01000000
KK-NP023	2014	Japan	bovine	feces	commensal	E	O132	H18	6353	-	-	-	-	DRR102976	BFWO01000000
KK-NP024	2014	Japan	bovine	feces	commensal	B1	O163	H19	7883	-	-	-	-	DRR102977	BFWP01000000
KK-NP025	2014	Japan	bovine	feces	commensal	B1	Onovel27	H8	6488	-	-	-	-	DRR102978	BFWQ01000000
KK-P001	2014	Japan	bovine	feces	commensal	A	Onovel14	H14	7873	stx1a	stx2a,c/d	-	-	DRR102979	BFWR01000000
KK-P002	2014	Japan	bovine	feces	commensal	B1	O26	H11	21	-	-	beta1	-	DRR102980	BFWS01000000
KK-P003	2014	Japan	bovine	feces	commensal	B1	O113	H21	ND	-	stx2a,c/d	-	-	DRR102981	BFWT01000000
KK-P005	2014	Japan	bovine	feces	commensal	D	O145	H28	32	stx1a	-	gamma1	-	DRR102982	BFWU01000000
KK-P006	2014	Japan	bovine	feces	commensal	B1	Onovel1	H16	295	-	stx2c/d	-	-	DRR102983	BFWV01000000
KK-P007	2014	Japan	bovine	feces	commensal	B1	O156	H8	327	-	-	theta	-	DRR102984	BFWW01000000
KK-P011	2014	Japan	bovine	feces	commensal	B1	O177	H11	765	-	-	beta1	-	DRR102985	BFWX01000000
KK-P012	2014	Japan	bovine	feces	commensal	B1	O113	H21	223	-	stx2a,c/d	-	-	DRR102986	BFWY01000000
KK-P015	2014	Japan	bovine	feces	commensal	B1	O8_wzm/wzt_O124var1_wzx/wzy	H19	2385	stx1a	stx2a	-	-	DRR102987	BFWZ01000000
KK-P016	2014	Japan	bovine	feces	commensal	B1	O113	H21	223	-	stx2a,c/d	-	-	DRR102988	BFXA01000000
KK-P019	2014	Japan	bovine	feces	commensal	B1	O8	H8	5937	-	stx2a	-	-	DRR102989	BFXB01000000
KK-P020	2014	Japan	bovine	feces	commensal	B1	Onovel1	H16	295	-	stx2c/d	-	-	DRR102990	BFXC01000000
KK-P021	2014	Japan	bovine	feces	commensal	B1	O163	H19	679	-	stx2a,c/d	-	-	DRR102991	BFXD01000000
KK-P023	2014	Japan	bovine	feces	commensal	B1	O153var1	H25	58	stx1a	stx2a	-	-	DRR102992	BFXE01000000
KK-P027	2014	Japan	bovine	feces	commensal	B1	O6	H34	7616	-	stx2a,c/d	-	-	DRR102993	BFXF01000000
KK-P029	2014	Japan	bovine	feces	commensal	B1	O128	H2	ND	-	-	beta1	-	DRR102994	BFXG01000000
KK-P033	2014	Japan	bovine	feces	commensal	B1	O113	H21	223	-	stx2a,c/d	-	-	DRR102995	BFXH01000000
KK-P035	2014	Japan	bovine	feces	commensal	B2	O71	H6	583	-	-	alpha2	-	DRR102996	BFXI01000000
KK-P036	2014	Japan	bovine	feces	commensal	B1	O2var1	H29	515	-	stx2b,c/d	-	-	DRR102997	BFXJ01000000
KK-P038	2014	Japan	bovine	feces	commensal	B1	O156	H25	4942	stx1a	-	zeta/zeta3	-	DRR102998	BFXK01000000
KK-P040	2014	Japan	bovine	feces	commensal	B2	O54	H45	491?	-	-	-	-	DRR102999	BFXL01000000
KK-P041	2014	Japan	bovine	feces	commensal	B1	O177	H11	ND	-	-	beta1	-	DRR103000	BFXM01000000
KK-P042	2014	Japan	bovine	feces	commensal	B1	O185	H7	2387	-	stx2c/d	-	-	DRR103001	BFXN01000000
KK-P043	2014	Japan	bovine	feces	commensal	A	Onovel14	H14	7868	stx1a	stx2a,c/d	-	-	DRR103002	BFXO01000000
KK-P044	2014	Japan	bovine	feces	commensal	B1	O177	H11	765	-	-	beta1	-	DRR103003	BFXP01000000
KK-P045	2014	Japan	bovine	feces	commensal	D	UT	H28	137	-	-	gamma1	-	DRR103004	BFXQ01000000
KK-P048	2014	Japan	bovine	feces	commensal	B1	Gp11	H19	205	stx1a	stx2a,c/d	-	-	DRR103005	BFXR01000000
KK-P049	2014	Japan	bovine	feces	commensal	B1	O182	H25	300	-	-	zeta/zeta3	-	DRR103006	BFXS01000000
KK-P051	2014	Japan	bovine	feces	commensal	B1	Gp11	H19	205	stx1a	stx2a,c/d	-	-	DRR103007	BFXT01000000
KK-P055	2014	Japan	bovine	feces	commensal	B1	GP11	H19	205	stx1a	stx2a,c/d	-	-	DRR103008	BFXU01000000
KK-P057	2014	Japan	bovine	feces	commensal	B1	Onovel26	H2	2008	-	stx2a	-	-	DRR103009	BFXV01000000
KK-P059	2014	Japan	bovine	feces	commensal	B1	Onovel26	H2	7888	-	stx2a,c/d	-	-	DRR103010	BFXW01000000
KK-P060	2014	Japan	bovine	feces	commensal	B1	O177	H11	765	-	-	beta1	-	DRR103011	BFXX01000000
KK-P061	2014	Japan	bovine	feces	commensal	A	O109	H16	329	-	stx2a,g	-	-	DRR103012	BFXY01000000
KK-P062	2014	Japan	bovine	feces	commensal	A	O113	H4	10	stx1c	stx2c/d	-	-	DRR103013	BFXZ01000000
KK-P064	2014	Japan	bovine	feces	commensal	B1	O108var1	H19	205	-	stx2a,c/d	-	-	DRR103014	BFYA01000000
KK-P065	2014	Japan	bovine	feces	commensal	B1	Gp2	H25	5487*	stx1a	stx2c/d	-	-	DRR103015	BFYB01000000
KK-P066	2014	Japan	bovine	feces	commensal	B1	O130	H11	297	-	stx2a	-	-	DRR103016	BFYC01000000
KK-P067	2014	Japan	bovine	feces	commensal	B1	O88	H25	154	stx1a	stx2a,c/d	-	-	DRR103017	BFYD01000000
KS-NP011	2013	Japan	bovine	feces	commensal	B1	O148	H28	448	-	-	-	-	DRR103018	BFYE01000000
KS-NP012	2013	Japan	bovine	feces	commensal	B1	O168	H8	718	-	-	-	-	DRR103019	BFYF01000000
KS-NP013	2013	Japan	bovine	feces	commensal	B1	O168	H8	718	-	-	-	-	DRR103020	BFYG01000000
KS-NP014	2013	Japan	bovine	feces	commensal	B1	O86	H51	155	-	-	-	-	DRR103021	BFYH01000000
KS-NP015	2013	Japan	bovine	feces	commensal	B1	Onovel26	H7	196	-	-	-	-	DRR103022	BFYI01000000
KS-NP016	2013	Japan	bovine	feces	commensal	B1	O8	H19	162	-	-	-	-	DRR103023	BFYJ01000000
KS-NP018	2013	Japan	bovine	feces	commensal	B1	O88	H25	101	-	-	-	-	DRR103024	BFYK01000000
KS-NP019	2013	Japan	bovine	feces	commensal	B1	O8	H2	392	-	-	-	-	DRR103025	BFYL01000000
KS-NP025	2013	Japan	bovine	feces	commensal	B1	O15	H21	602	-	-	-	-	DRR103026	BFYM01000000
KS-NP027	2013	Japan	bovine	feces	commensal	B1	O23	H21	56	-	-	-	-	DRR103027	BFYN01000000
KS-NP029	2013	Japan	bovine	feces	commensal	B1	O3	H21	58	-	-	-	-	DRR103028	BFYO01000000
KS-NP031	2013	Japan	bovine	feces	commensal	B1	Onovel27	H8	6488	-	-	-	-	DRR103029	BFYP01000000
KS-NP033	2013	Japan	bovine	feces	commensal	B1	O116	H49	2520	-	-	-	-	DRR103030	BFYQ01000000
KS-NP035	2013	Japan	bovine	feces	commensal	B1	O8_wzm/wzt_O96_wzx/wzy	H8	109	-	-	-	-	DRR103031	BFYR01000000
KS-NP037	2013	Japan	bovine	feces	commensal	B1	O23	H25	156	-	-	-	-	DRR103032	BFYS01000000
KS-NP039	2013	Japan	bovine	feces	commensal	B1	O61	H19	1423	-	-	-	-	DRR103033	BFYT01000000
KS-NP041	2013	Japan	bovine	feces	commensal	B1	O8_wzm/wzt_O96_wzx/wzy	H8	109	-	-	-	-	DRR103034	BFYU01000000
KS-NP047	2013	Japan	bovine	feces	commensal	B1	O150	H8	906	-	-	-	-	DRR103035	BFYV01000000
KS-NP049	2013	Japan	bovine	feces	commensal	B1	O128	H12	1326	-	-	-	-	DRR103036	BFYW01000000
KS-NP063	2013	Japan	bovine	feces	commensal	B1	O103	H16	7867	-	-	-	-	DRR103037	BFYX01000000
KS-NP065	2013	Japan	bovine	feces	commensal	B1	O78	H21	58	-	-	-	-	DRR103038	BFYY01000000
KS-NP069	2013	Japan	bovine	feces	commensal	B1	O8_wzm/wzt_O96_wzx/wzy	H8	109	-	-	-	-	DRR103039	BFYZ01000000
KS-NP071	2013	Japan	bovine	feces	commensal	B1	Gp11	H7	278	-	-	-	-	DRR103040	BFZA01000000
KS-NP073	2013	Japan	bovine	feces	commensal	B1	O174	H21	677	-	stx2c/d	-	-	DRR103041	BFZB01000000
KS-NP075	2013	Japan	bovine	feces	commensal	B1	O174	H28	156	-	-	-	-	DRR103042	BFZC01000000
KS-NP079	2013	Japan	bovine	feces	commensal	B1	Onovel7	H7	1308	-	-	-	-	DRR103043	BFZD01000000
KS-NP081	2013	Japan	bovine	feces	commensal	B1	O174	H21	677	-	stx2c/d	-	-	DRR103044	BFZE01000000
KS-NP091	2013	Japan	bovine	feces	commensal	B1	O75	H38	4198	-	-	-	-	DRR103045	BFZF01000000
KS-NP093	2013	Japan	bovine	feces	commensal	B1	O136	H40	297	-	-	-	-	DRR103046	BFZG01000000
KS-NP096	2013	Japan	bovine	feces	commensal	B2	Gp7	H1	135	-	-	-	-	DRR103047	BFZH01000000
KS-NP101	2013	Japan	bovine	feces	commensal	B1	Onovel3	H7	101	-	-	-	-	DRR103048	BFZI01000000
KS-NP108	2013	Japan	bovine	feces	commensal	B1	O75	H10	7871	-	-	-	-	DRR103049	BFZJ01000000
KS-NP112	2013	Japan	bovine	feces	commensal	B1	O6	H49	1079	-	-	-	-	DRR103050	BFZK01000000
KS-NP115	2013	Japan	bovine	feces	commensal	A	Onovel32	H10	10	-	-	-	-	DRR103051	BFZL01000000
KS-NP120	2013	Japan	bovine	feces	commensal	E	O61	H14	ND	-	-	-	-	DRR103052	BFZM01000000
KS-NP122	2013	Japan	bovine	feces	commensal	B1	O174	H8	13	-	-	-	-	DRR103053	BFZN01000000
KS-NP129	2013	Japan	bovine	feces	commensal	B1	Gp8	H9	58	-	-	-	-	DRR103054	BFZO01000000
KS-P001	2013	Japan	bovine	feces	commensal	A	O113	H4	10	stx1a	stx2c/d	-	-	DRR103055	BFZP01000000
KS-P002	2013	Japan	bovine	feces	commensal	A	O113	H4	10?	stx1c	stx2c/d	-	-	DRR103056	BFZQ01000000
KS-P003	2013	Japan	bovine	feces	commensal	B2	Gp7	H5	95	-	-	-	-	DRR103057	BFZR01000000
KS-P007	2013	Japan	bovine	feces	commensal	A	O113	H4	10	stx1a	stx2c/d	-	-	DRR103058	BFZS01000000
KS-P008	2013	Japan	bovine	feces	commensal	B1	O103	H2	17	stx1a	-	epsilon1	-	DRR103059	BFZT01000000
KS-P009	2013	Japan	bovine	feces	commensal	A	O113	H4	7905	stx1a	stx2c/d	-	-	DRR103060	BFZU01000000
KS-P011	2013	Japan	bovine	feces	commensal	A	O136	H16	329	stx1a	-	-	-	DRR103061	BFZV01000000
KS-P012	2013	Japan	bovine	feces	commensal	B1	O177	H11	ND	-	-	beta1	-	DRR103062	BFZW01000000
KS-P013	2013	Japan	bovine	feces	commensal	A	O165	H25	119	stx1a	stx2a	epsilon1	-	DRR103063	BFZX01000000
KS-P014	2013	Japan	bovine	feces	commensal	E	O157	H7	11	-	stx2c/d	gamma1	-	DRR103064	BFZY01000000
KS-P015	2013	Japan	bovine	feces	commensal	B1	O171	H2	332	-	stx2c/d	-	-	DRR103065	BFZZ01000000
KS-P016	2013	Japan	bovine	feces	commensal	A	O10	H25	6126	-	-	theta	-	DRR103066	BGAA01000000
KS-P017	2013	Japan	bovine	feces	commensal	B1	Gp11	H19	443	stx1a	stx2a	-	-	DRR103067	BGAB01000000
KS-P018	2013	Japan	bovine	feces	commensal	B1	O174	H21	677	-	stx2c/d	-	-	DRR103068	BGAC01000000
KS-P019	2013	Japan	bovine	feces	commensal	A	O49	H10	206	-	-	iota1	-	DRR103069	BGAD01000000
KS-P020	2013	Japan	bovine	feces	commensal	B1	O185	H7	2387	-	stx2c/d	-	-	DRR103070	BGAE01000000
KS-P021	2013	Japan	bovine	feces	commensal	B1	O177	H11	765	-	-	beta1	-	DRR103071	BGAF01000000
KS-P022	2013	Japan	bovine	feces	commensal	B1	O168	H8	718	-	stx2g	-	-	DRR103072	BGAG01000000
KS-P023	2013	Japan	bovine	feces	commensal	A	O49	H10	206	-	-	iota1	-	DRR103073	BGAH01000000
KS-P024	2013	Japan	bovine	feces	commensal	A	O136	H16	329	stx1a	-	-	-	DRR103074	BGAI01000000
KS-P026	2013	Japan	bovine	feces	commensal	A	O113	H4	10	stx1c	stx2c/d	-	-	DRR103075	BGAJ01000000
KS-P027	2013	Japan	bovine	feces	commensal	B2	Gp7	H5	95	-	-	-	-	DRR103076	BGAK01000000
KS-P028	2013	Japan	bovine	feces	commensal	B1	Gp11	H19	205	-	stx2a	-	-	DRR103077	BGAL01000000
KS-P029	2013	Japan	bovine	feces	commensal	B1	O156	H8	7897	-	-	theta	-	DRR103078	BGAM01000000
KS-P033	2013	Japan	bovine	feces	commensal	F	O24	H18	657	-	-	-	-	DRR103079	BGAN01000000
KS-P035	2013	Japan	bovine	feces	commensal	A	O35	H10	206	-	-	kappa	-	DRR103080	BGAO01000000
KS-P036	2013	Japan	bovine	feces	commensal	B1	Onovel26	H2	2008	-	stx2a	-	-	DRR103081	BGAP01000000
KS-P037	2013	Japan	bovine	feces	commensal	B1	O168	H8	718	-	stx2c/d	-	-	DRR103082	BGAQ01000000
KS-P038	2013	Japan	bovine	feces	commensal	B1	O55	H12	101	stx1a	-	-	-	DRR103083	BGAR01000000
KS-P039	2013	Japan	bovine	feces	commensal	B1	O22	H8	446	-	stx2c/d	-	-	DRR103084	BGAS01000000
KS-P040	2013	Japan	bovine	feces	commensal	A	O109	H10	206	-	stx2a	iota1	-	DRR103085	BGAT01000000
KS-P044	2013	Japan	bovine	feces	commensal	B1	UT	H19	517	-	-	epsilon2	-	DRR103086	BGAU01000000
KS-P045	2013	Japan	bovine	feces	commensal	A	O109	H16	7889	-	stx2g	-	-	DRR103087	BGAV01000000
KS-P049	2013	Japan	bovine	feces	commensal	B1	O182	H25	300	stx1a	-	zeta/zeta3	-	DRR103088	BGAW01000000
KS-P050	2013	Japan	bovine	feces	commensal	B1	O26	H11	29	-	-	beta1	-	DRR103089	BGAX01000000
KS-P054	2013	Japan	bovine	feces	commensal	B1	O174	H21	677	-	stx2c/d	-	-	DRR103091	BGAZ01000000
KS-P055	2013	Japan	bovine	feces	commensal	B1	O55	H12	101	stx1a	-	-	-	DRR103092	BGBA01000000
KS-P056	2013	Japan	bovine	feces	commensal	A	O35	H10	206	-	-	kappa	-	DRR103093	BGBB01000000
KS-P058	2013	Japan	bovine	feces	commensal	D	O145	H28	32	-	-	gamma1	-	DRR103094	BGBC01000000
KS-P061	2013	Japan	bovine	feces	commensal	B1	O174	H21	677	-	stx2c/d	-	-	DRR103095	BGBD01000000
KS-P063	2013	Japan	bovine	feces	commensal	B1	O55	H12	101	stx1a	-	-	-	DRR103096	BGBE01000000
KS-P064	2013	Japan	bovine	feces	commensal	B1	O51	H2	20	-	-	beta1	-	DRR103097	BGBF01000000
KS-P065	2013	Japan	bovine	feces	commensal	B1	O153var1	H11	765	-	-	beta1	-	DRR103098	BGBG01000000
KS-P066	2013	Japan	bovine	feces	commensal	A	O6	H10	43	stx1c	-	-	-	DRR103099	BGBH01000000
KS-P067	2013	Japan	bovine	feces	commensal	A	O109	H16	7889	-	stx2a,c/d	-	-	DRR103100	BGBI01000000
KS-P068	2013	Japan	bovine	feces	commensal	B1	O177	H11	765	-	-	beta1	-	DRR103101	BGBJ01000000
KS-P070	2013	Japan	bovine	feces	commensal	A	O10	H25	6126	-	-	theta	-	DRR103102	BGBK01000000
KS-P071	2013	Japan	bovine	feces	commensal	B1	O153var1	H19	517	-	-	epsilon2	-	DRR103103	BGBL01000000
KS-P072	2013	Japan	bovine	feces	commensal	B1	O156	H8	327	-	-	theta	-	DRR103104	BGBM01000000
KS-P076	2013	Japan	bovine	feces	commensal	E	O71	H18	6118	-	stx2a	-	-	DRR103105	BGBN01000000
KS-P081	2013	Japan	bovine	feces	commensal	B1	O154	H8	642	-	-	theta	-	DRR103106	BGBO01000000
KS-P083	2013	Japan	bovine	feces	commensal	B2	O109	H5	647*	stx1a	-	-	-	DRR103107	BGBP01000000
KS-P087	2013	Japan	bovine	feces	commensal	B1	O177	H11	765	-	-	beta1	-	DRR103108	BGBQ01000000
KS-P091	2013	Japan	bovine	feces	commensal	B1	O115	H10	101	stx1a	-	-	-	DRR103110	BGBS01000000
KS-P093	2013	Japan	bovine	feces	commensal	B1	O153var1	H19	517	-	-	epsilon2	-	DRR103111	BGBT01000000
KS-P099	2013	Japan	bovine	feces	commensal	A	O5	H9	342	stx1a	-	beta1	-	DRR103112	BGBU01000000
NS-NP002	2014	Japan	bovine	feces	commensal	B1	O78	H4	58	-	-	-	-	DRR103113	BGBV01000000
NS-NP003	2014	Japan	bovine	feces	commensal	B1	O43	H2	937	-	-	-	-	DRR103114	BGBW01000000
NS-NP005	2014	Japan	bovine	feces	commensal	B1	O91	H28	1196	-	-	-	-	DRR103115	BGBX01000000
NS-NP006	2014	Japan	bovine	feces	commensal	B1	O168	H8	718	-	-	-	-	DRR103116	BGBY01000000
NS-NP007	2014	Japan	bovine	feces	commensal	B1	O10	H42	ND	-	-	-	-	DRR103117	BGBZ01000000
NS-NP008	2014	Japan	bovine	feces	commensal	B1	O8	H19	162	-	-	-	-	DRR103118	BGCA01000000
NS-NP010	2014	Japan	bovine	feces	commensal	B1	UT	H51	155	-	-	-	-	DRR103119	BGCB01000000
NS-NP011	2014	Japan	bovine	feces	commensal	B1	O88	H8	446	-	-	-	-	DRR103120	BGCC01000000
NS-NP012	2014	Japan	bovine	feces	commensal	B1	O79	H34	7899	-	-	-	-	DRR103121	BGCD01000000
NS-NP013	2014	Japan	bovine	feces	commensal	B1	O150	H8	906	-	-	-	-	DRR103122	BGCE01000000
NS-NP014	2014	Japan	bovine	feces	commensal	B1	O8	H19	2079	-	-	-	-	DRR103123	BGCF01000000
NS-NP015	2014	Japan	bovine	feces	commensal	B1	O91	H7	1304	-	-	-	-	DRR103124	BGCG01000000
NS-NP016	2014	Japan	bovine	feces	commensal	A	O116	H48	3519	-	-	-	-	DRR103125	BGCH01000000
NS-NP017	2014	Japan	bovine	feces	commensal	B1	O150	H8	906	-	-	-	-	DRR103126	BGCI01000000
NS-NP018	2014	Japan	bovine	feces	commensal	A	O150	H20	1324	-	-	-	-	DRR103127	BGCJ01000000
NS-NP019	2014	Japan	bovine	feces	commensal	B1	O88	H8	906	-	-	-	-	DRR103128	BGCK01000000
NS-NP020	2014	Japan	bovine	feces	commensal	B1	O6	H49	1079	-	-	-	-	DRR103129	BGCL01000000
NS-NP021	2014	Japan	bovine	feces	commensal	B1	O110	H28	348	-	-	-	-	DRR103130	BGCM01000000
NS-NP022	2014	Japan	bovine	feces	commensal	B1	O155	H21	155	-	-	-	-	DRR103131	BGCN01000000
NS-NP023	2014	Japan	bovine	feces	commensal	B1	O3	H19	201	-	-	-	-	DRR103132	BGCO01000000
NS-NP024	2014	Japan	bovine	feces	commensal	B1	O88	H25	ND	-	-	-	-	DRR103133	BGCP01000000
NS-NP025	2014	Japan	bovine	feces	commensal	B1	O78	H4	58	-	-	-	-	DRR103134	BGCQ01000000
NS-NP026	2014	Japan	bovine	feces	commensal	B1	O103	H16	7867	-	-	-	-	DRR103135	BGCR01000000
NS-NP027	2014	Japan	bovine	feces	commensal	A	Gp7	H27	ND	-	-	-	-	DRR103136	BGCS01000000
NS-NP028	2014	Japan	bovine	feces	commensal	B1	O38	H21	85	-	-	-	-	DRR103137	BGCT01000000
NS-NP029	2014	Japan	bovine	feces	commensal	B1	UT	H8	ND	-	-	-	-	DRR103138	BGCU01000000
NS-NP030	2014	Japan	bovine	feces	commensal	B1	O8	H2	ND	-	-	-	-	DRR103139	BGCV01000000
NS-NP031	2014	Japan	bovine	feces	commensal	B1	O23	H21	56	-	-	-	-	DRR103140	BGCW01000000
NS-NP032	2014	Japan	bovine	feces	commensal	A	O174	H9	1510	-	-	-	-	DRR103141	BGCX01000000
NS-NP033	2014	Japan	bovine	feces	commensal	B1	Gp2	H8	109	-	-	-	-	DRR103142	BGCY01000000
NS-NP034	2014	Japan	bovine	feces	commensal	B1	O43	H2	ND	-	-	-	-	DRR103143	BGCZ01000000
NS-NP035	2014	Japan	bovine	feces	commensal	B1	O155	H21	7869	-	-	-	-	DRR103144	BGDA01000000
NS-NP036	2014	Japan	bovine	feces	commensal	B1	O6	H49	1079	-	-	-	-	DRR103145	BGDB01000000
NS-NP037	2014	Japan	bovine	feces	commensal	B1	O148	H28	448	-	-	-	-	DRR103146	BGDC01000000
NS-NP038	2014	Japan	bovine	feces	commensal	B1	O179	H8	297	-	-	-	-	DRR103147	BGDD01000000
NS-NP039	2014	Japan	bovine	feces	commensal	A	O159	H34	939	-	-	-	-	DRR103148	BGDE01000000
NS-NP040	2014	Japan	bovine	feces	commensal	B2	O8_wzm/wzt_O147_wzx/wzy	H5	7900	-	-	-	-	DRR103149	BGDF01000000
NS-NP041	2014	Japan	bovine	feces	commensal	B1	O156	H37	7593	-	-	-	-	DRR103150	BGDG01000000
NS-NP042	2014	Japan	bovine	feces	commensal	B1	O153var2	H21	58	-	-	-	-	DRR103151	BGDH01000000
NS-NP043	2014	Japan	bovine	feces	commensal	B1	O139	H19	1125	-	-	-	-	DRR103152	BGDI01000000
NS-P001	2014	Japan	bovine	feces	commensal	B1	O115	H10	101	stx1a	-	-	-	DRR103153	BGDJ01000000
NS-P002	2014	Japan	bovine	feces	commensal	B1	O26	H11	29	-	-	beta1	-	DRR103154	BGDK01000000
NS-P003	2014	Japan	bovine	feces	commensal	B1	O171	H2	332	-	stx2c/d	-	-	DRR103155	BGDL01000000
NS-P006	2014	Japan	bovine	feces	commensal	B1	O103	H2	17	stx1a	-	epsilon1	-	DRR103156	BGDM01000000
NS-P007	2014	Japan	bovine	feces	commensal	D	O145	H28	32	-	-	gamma1	-	DRR103157	BGDN01000000
NS-P008	2014	Japan	bovine	feces	commensal	B1	O6	H34	7907	-	stx2c/d	-	-	DRR103158	BGDO01000000
NS-P009	2014	Japan	bovine	feces	commensal	B1	O55	H12	101	stx1a	-	-	-	DRR103159	BGDP01000000
NS-P010	2014	Japan	bovine	feces	commensal	B1	O26	H11	29	-	-	beta1	-	DRR103160	BGDQ01000000
NS-P011	2014	Japan	bovine	feces	commensal	B1	O76	H7	795	-	stx2a	theta	-	DRR103161	BGDR01000000
NS-P012	2014	Japan	bovine	feces	commensal	B1	O8_wzm/wzt_O124var1_wzx/wzy	H19	2385	-	stx2a	-	-	DRR103162	BGDS01000000
NS-P015	2014	Japan	bovine	feces	commensal	B1	O121	H19	655	-	-	epsilon1	-	DRR103163	BGDT01000000
NS-P017	2014	Japan	bovine	feces	commensal	B1	O22	H8	446	-	stx2c/d	-	-	DRR103164	BGDU01000000
NS-P021	2014	Japan	bovine	feces	commensal	B1	O6	H34	7616*	-	stx2a,c/d	-	-	DRR103165	BGDV01000000
NS-P024	2014	Japan	bovine	feces	commensal	B1	Gp2	H25	5487	-	stx2a,c/d	-	-	DRR103166	BGDW01000000
NS-P027	2014	Japan	bovine	feces	commensal	B1	O153var1	H25	58	stx1a	stx2a,c/d	-	-	DRR103167	BGDX01000000
NS-P028	2014	Japan	bovine	feces	commensal	B1	O8	H49	111	stx1a	-	-	-	DRR103168	BGDY01000000
NS-P029	2014	Japan	bovine	feces	commensal	B1	O163	H19	679	-	stx2a,c/d	-	-	DRR103169	BGDZ01000000
NS-P032	2014	Japan	bovine	feces	commensal	B1	O76	H7	795	-	-	theta	-	DRR103170	BGEA01000000
NS-P035	2014	Japan	bovine	feces	commensal	B1	O130	H11	297	-	stx2a,c/d	-	-	DRR103171	BGEB01000000
NS-P038	2014	Japan	bovine	feces	commensal	A	O10	H25	6126	-	-	theta	-	DRR103172	BGEC01000000
NS-P039	2014	Japan	bovine	feces	commensal	B1	O171	H2	332	-	stx2a,c/d	-	-	DRR103173	BGED01000000
NS-P045	2014	Japan	bovine	feces	commensal	B1	Gp11	H19	192	-	stx2a,c/d	-	-	DRR103174	BGEE01000000
NS-P046	2014	Japan	bovine	feces	commensal	B1	O156	H8	327	-	-	theta	-	DRR103175	BGEF01000000
NS-P047	2014	Japan	bovine	feces	commensal	A	O116	H28	ND	-	stx2a,g	-	-	DRR103176	BGEG01000000
NS-P049	2014	Japan	bovine	feces	commensal	B1	O105	H7	1890	-	-	theta	-	DRR103177	BGEH01000000
NS-P051	2014	Japan	bovine	feces	commensal	A	O10	H25	6126	-	-	theta	-	DRR103178	BGEI01000000
NS-P052	2014	Japan	bovine	feces	commensal	B1	UT	H10	441	-	stx2a,c/d	-	-	DRR103179	BGEJ01000000
NS-P056	2014	Japan	bovine	feces	commensal	B1	O130	H11	297	stx1a	stx2a	-	-	DRR103180	BGEK01000000
NS-P058	2014	Japan	bovine	feces	commensal	B1	O70	H11	ND	-	-	beta1	-	DRR103181	BGEL01000000
NS-P059	2014	Japan	bovine	feces	commensal	B1	O130	H11	297	stx1a	stx2a,c/d	-	-	DRR103182	BGEM01000000
NS-P065	2014	Japan	bovine	feces	commensal	B1	O163	H19	679	-	stx2a,c/d	-	-	DRR103183	BGEN01000000
NS-P067	2014	Japan	bovine	feces	commensal	B1	O174	H28	156	stx1a	stx2a	-	-	DRR103184	BGEO01000000
NS-P070	2014	Japan	bovine	feces	commensal	A	O113	H4	10	stx1c	stx2c/d	-	-	DRR103185	BGEP01000000
NS-P071	2014	Japan	bovine	feces	commensal	B1	O156	H8	327	-	-	theta	-	DRR103186	BGEQ01000000
NS-P072	2014	Japan	bovine	feces	commensal	B1	UT	H10	441	-	stx2a,c/d	-	-	DRR103187	BGER01000000
NS-P073	2014	Japan	bovine	feces	commensal	B1	O108var1	H8	5978	stx1a	stx2a,c/d	-	-	DRR103188	BGES01000000
NS-P074	2014	Japan	bovine	feces	commensal	B1	O163	H19	679*	-	stx2a,c/d	-	-	DRR103189	BGET01000000
NS-P078	2014	Japan	bovine	feces	commensal	B1	O25	H2	20	-	-	beta1	-	DRR103190	BGEU01000000
NS-P079	2014	Japan	bovine	feces	commensal	B1	O163	H19	679?	-	stx2a,c/d	-	-	DRR103191	BGEV01000000
OU-NP001	2014	Japan	bovine	feces	commensal	B1	O153var1	H28	58	-	-	-	-	DRR103192	BGEW01000000
OU-NP003	2014	Japan	bovine	feces	commensal	B1	UT	H8	ND	-	-	-	-	DRR103193	BGEX01000000
OU-NP005	2014	Japan	bovine	feces	commensal	B1	O85	H10	1724	-	-	-	-	DRR103194	BGEY01000000
OU-NP007	2014	Japan	bovine	feces	commensal	B1	Gp13	H37	ND	-	-	-	-	DRR103195	BGEZ01000000
OU-NP009	2014	Japan	bovine	feces	commensal	B1	O8	H23	906	-	-	-	-	DRR103196	BGFA01000000
OU-NP011	2014	Japan	bovine	feces	commensal	B1	Gp15	H10	ND	-	-	-	-	DRR103197	BGFB01000000
OU-NP013	2014	Japan	bovine	feces	commensal	D	Onovel31	H45	ND	-	-	-	-	DRR103198	BGFC01000000
OU-NP015	2014	Japan	bovine	feces	commensal	B1	O22	H7	2766	-	-	-	-	DRR103199	BGFD01000000
OU-NP017	2014	Japan	bovine	feces	commensal	A	UT	H20	ND	-	-	-	-	DRR103200	BGFE01000000
OU-NP019	2014	Japan	bovine	feces	commensal	C	O8	H9	ND	-	-	-	-	DRR103201	BGFF01000000
OU-NP021	2014	Japan	bovine	feces	commensal	B1	O8	H53	345?	-	-	-	-	DRR103202	BGFG01000000
OU-NP023	2014	Japan	bovine	feces	commensal	F	UT	H23	1163	-	-	-	-	DRR103203	BGFH01000000
OU-NP025	2014	Japan	bovine	feces	commensal	B1	UT	H38	154	-	-	-	-	DRR103204	BGFI01000000
OU-NP027	2014	Japan	bovine	feces	commensal	B1	UT	H20	ND	-	-	-	-	DRR103205	BGFJ01000000
OU-NP029	2014	Japan	bovine	feces	commensal	B1	UT	H8	ND	-	-	-	-	DRR103206	BGFK01000000
OU-NP031	2014	Japan	bovine	feces	commensal	B1	UT	H21	ND	-	-	-	-	DRR103207	BGFL01000000
OU-NP033	2014	Japan	bovine	feces	commensal	B1	O3	H19	ND	-	-	-	-	DRR103208	BGFM01000000
OU-NP035	2014	Japan	bovine	feces	commensal	B1	UT	H8	4212	-	-	-	-	DRR103209	BGFN01000000
OU-NP037	2014	Japan	bovine	feces	commensal	A	O99	H55	1122?	-	-	-	-	DRR103210	BGFO01000000
OU-NP041	2014	Japan	bovine	feces	commensal	B1	O9	H10	ND	-	-	-	-	DRR103211	BGFP01000000
OU-NP043	2014	Japan	bovine	feces	commensal	D	Gp9	H18	ND	-	-	-	-	DRR103212	BGFQ01000000
OU-NP045	2014	Japan	bovine	feces	commensal	E	O166	H10	ND	-	-	-	-	DRR103213	BGFR01000000
OU-NP047	2014	Japan	bovine	feces	commensal	B1	UT	H51	ND	-	-	-	-	DRR103214	BGFS01000000
OU-NP049	2014	Japan	bovine	feces	commensal	B1	UT	H8	ND	-	-	-	-	DRR103215	BGFT01000000
OU-P001	2014	Japan	bovine	feces	commensal	B1	O156	H8	327	-	-	theta	-	DRR103216	BGFU01000000
OU-P006	2014	Japan	bovine	feces	commensal	B1	Onovel30	H7	ND	stx1a	stx2a,c/d	-	-	DRR103217	BGFV01000000
OU-P009	2014	Japan	bovine	feces	commensal	B1	O156	H8	ND	-	-	theta	-	DRR103218	BGFW01000000
OU-P011	2014	Japan	bovine	feces	commensal	B1	Onovel30	H7	278*?	stx1a	stx2a,c/d	-	-	DRR103219	BGFX01000000
OU-P014	2014	Japan	bovine	feces	commensal	B1	O22	H8	ND	stx1a	stx2a,c/d	-	-	DRR103220	BGFY01000000
OU-P020	2014	Japan	bovine	feces	commensal	B1	O82	H8	ND	stx1a	stx2c/d	-	-	DRR103221	BGFZ01000000
OU-P024	2014	Japan	bovine	feces	commensal	B1	O103	H2	ND	stx1a	-	epsilon1	-	DRR103222	BGGA01000000
OU-P027	2014	Japan	bovine	feces	commensal	B1	UT	H8	ND	stx1a	stx2a,c/d	-	-	DRR103223	BGGB01000000
OU-P037	2014	Japan	bovine	feces	commensal	B1	UT	H25	ND	-	-	zeta/zeta3	-	DRR103224	BGGC01000000
OU-P038	2014	Japan	bovine	feces	commensal	B1	O82	H8	101	stx1a	stx2a,c/d	-	-	DRR103225	BGGD01000000
OU-P048	2014	Japan	bovine	feces	commensal	B1	O156	H8	327	-	-	theta	-	DRR103227	BGGF01000000
OU-P049	2014	Japan	bovine	feces	commensal	B1	Gp2	H25	5487	stx1a	stx2a,c/d	-	-	DRR103228	BGGG01000000
OU-P061	2014	Japan	bovine	feces	commensal	B1	Gp2	H25	5487	stx1a	stx2a,c/d	-	-	DRR103229	BGGH01000000
OU-P062	2014	Japan	bovine	feces	commensal	B1	O156	H8	327	-	-	theta	-	DRR103230	BGGI01000000
OU-P068	2014	Japan	bovine	feces	commensal	B1	UT	H8	101	stx1a	stx2a,c/d	-	-	DRR103231	BGGJ01000000
OU-P080	2014	Japan	bovine	feces	commensal	D	Gp9	H18	7902	-	-	theta	-	DRR103232	BGGK01000000
OU-P082	2014	Japan	bovine	feces	commensal	A	UT	H40	10	-	-	theta	-	DRR103233	BGGL01000000
OU-P088	2014	Japan	bovine	feces	commensal	B1	UT	H8	101	stx1a	stx2c/d	-	-	DRR103234	BGGM01000000
OU-P098	2014	Japan	bovine	feces	commensal	B1	UT	H49	3494	-	-	theta	-	DRR103235	BGGN01000000
SI-NP002	2014	Japan	bovine	feces	commensal	B1	O23	H8	ND	-	-	-	-	DRR103236	BGGO01000000
SI-NP003	2014	Japan	bovine	feces	commensal	B1	O6	H49	1079	-	-	-	-	DRR103237	BGGP01000000
SI-NP006	2014	Japan	bovine	feces	commensal	B1	Onovel7	H7	1308	-	-	-	-	DRR103238	BGGQ01000000
SI-NP007	2014	Japan	bovine	feces	commensal	B1	UT	H7	278	-	-	-	-	DRR103239	BGGR01000000
SI-NP008	2014	Japan	bovine	feces	commensal	B1	Onovel27	H8	164	-	-	-	-	DRR103240	BGGS01000000
SI-NP009	2014	Japan	bovine	feces	commensal	B1	UT	H7	ND	-	-	-	-	DRR103241	BGGT01000000
SI-NP010	2014	Japan	bovine	feces	commensal	B1	O7	H21	56	-	-	-	-	DRR103242	BGGU01000000
SI-NP011	2014	Japan	bovine	feces	commensal	A	O109	H28	730	-	-	-	-	DRR103243	BGGV01000000
SI-NP012	2014	Japan	bovine	feces	commensal	A	UT	H12	10	-	-	-	-	DRR103244	BGGW01000000
SI-NP013	2014	Japan	bovine	feces	commensal	B1	Onovel30	H7	278	-	-	-	-	DRR103245	BGGX01000000
SI-NP014	2014	Japan	bovine	feces	commensal	A	Onovel32	H9	10	-	-	-	-	DRR103246	BGGY01000000
SI-NP015	2014	Japan	bovine	feces	commensal	D	Gp9	H1	549	-	-	-	-	DRR103247	BGGZ01000000
SI-NP017	2014	Japan	bovine	feces	commensal	B1	Gp2	H21	278	-	-	-	-	DRR103248	BGHA01000000
SI-NP018	2014	Japan	bovine	feces	commensal	B1	UT	H16	295?	-	-	-	-	DRR103249	BGHB01000000
SI-NP020	2014	Japan	bovine	feces	commensal	A	Onovel21	H14	ND	-	-	-	-	DRR103250	BGHC01000000
SI-NP021	2014	Japan	bovine	feces	commensal	B1	O120	H10	711	-	-	-	-	DRR103251	BGHD01000000
SI-NP022	2014	Japan	bovine	feces	commensal	E	Onovel21	H39	6646	-	-	-	-	DRR103252	BGHE01000000
SI-NP024	2014	Japan	bovine	feces	commensal	A	UT	H10	2705	-	-	-	-	DRR103253	BGHF01000000
SI-NP027	2014	Japan	bovine	feces	commensal	A	O9	H30	ND	-	-	-	-	DRR103254	BGHG01000000
SI-NP028	2014	Japan	bovine	feces	commensal	B1	O8_wzm/wzt_Gp6_wzx/wzy	H21	ND	-	-	-	-	DRR103255	BGHH01000000
SI-NP030	2014	Japan	bovine	feces	commensal	B1	O1	H1	388	-	-	-	-	DRR103257	BGHJ01000000
SI-NP031	2014	Japan	bovine	feces	commensal	B1	UT	H14	ND	-	-	-	-	DRR103258	BGHK01000000
SI-NP032	2014	Japan	bovine	feces	commensal	B2	O25	H1	73	-	-	-	-	DRR103259	BGHL01000000
SI-NP033	2014	Japan	bovine	feces	commensal	B1	O155	H21	58	-	-	-	-	DRR103260	BGHM01000000
SI-NP034	2014	Japan	bovine	feces	commensal	B1	Gp8	H16	58	-	-	-	-	DRR103261	BGHN01000000
SI-NP036	2014	Japan	bovine	feces	commensal	B1	O22	H8	446	-	-	-	-	DRR103262	BGHO01000000
SI-NP037	2014	Japan	bovine	feces	commensal	B1	UT	H43	1592	-	-	-	-	DRR103263	BGHP01000000
SI-NP038	2014	Japan	bovine	feces	commensal	B1	O74	H8	906	-	-	-	-	DRR103264	BGHQ01000000
SI-NP039	2014	Japan	bovine	feces	commensal	B1	O9	H25	58	-	-	-	-	DRR103265	BGHR01000000
SI-NP040	2014	Japan	bovine	feces	commensal	B1	UT	H7	4088	-	-	-	-	DRR103266	BGHS01000000
SI-NP041	2014	Japan	bovine	feces	commensal	B1	O8_wzm/wzt_Gp6_wzx/wzy	H8	ND	-	-	-	-	DRR103267	BGHT01000000
SI-NP043	2014	Japan	bovine	feces	commensal	A	Gp10	H11	10	-	-	-	-	DRR103268	BGHU01000000
SI-NP045	2014	Japan	bovine	feces	commensal	B1	UT	H49	1079	-	-	-	-	DRR103269	BGHV01000000
SI-NP047	2014	Japan	bovine	feces	commensal	B1	UT	H21	53	-	-	-	-	DRR103270	BGHW01000000
SI-NP049	2014	Japan	bovine	feces	commensal	B1	UT	H19	1125	-	-	-	-	DRR103271	BGHX01000000
SI-NP053	2014	Japan	bovine	feces	commensal	B1	UT	H34	ND	-	-	-	-	DRR103272	BGHY01000000
SI-NP055	2014	Japan	bovine	feces	commensal	B1	O150	H8	906	-	-	-	-	DRR103273	BGHZ01000000
SI-NP059	2014	Japan	bovine	feces	commensal	B1	Onovel1	H16	295	-	stx2b	-	-	DRR103274	BGIA01000000
SI-P002	2014	Japan	bovine	feces	commensal	A	O180	H2	301	-	-	rho	-	DRR103275	BGIB01000000
SI-P004	2014	Japan	bovine	feces	commensal	B1	O171	H2	332	-	stx2c/d	-	-	DRR103276	BGIC01000000
SI-P006	2014	Japan	bovine	feces	commensal	B1	O15	H2	ND	stx1a	-	epsilon1	-	DRR103277	BGID01000000
SI-P010	2014	Japan	bovine	feces	commensal	B1	O55	H12	ND	stx1a	-	-	-	DRR103278	BGIE01000000
SI-P012	2014	Japan	bovine	feces	commensal	B1	O105	H7	ND	-	-	theta	-	DRR103279	BGIF01000000
SI-P015	2014	Japan	bovine	feces	commensal	B1	O128	H2	ND	-	-	beta1	-	DRR103281	BGIH01000000
SI-P019	2014	Japan	bovine	feces	commensal	B1	O150	H8	ND	-	stx2a	-	-	DRR103282	BGII01000000
SI-P021	2014	Japan	bovine	feces	commensal	A	O180	H2	301	-	-	rho	-	DRR103283	BGIJ01000000
SI-P024	2014	Japan	bovine	feces	commensal	B2	O170	H14	2565	-	-	-	-	DRR103284	BGIK01000000
SI-P025	2014	Japan	bovine	feces	commensal	D	O145	H28	32	-	-	gamma1	-	DRR103285	BGIL01000000
SI-P027	2014	Japan	bovine	feces	commensal	B1	O156	H8	327	-	-	theta	-	DRR103286	BGIM01000000
SI-P030	2014	Japan	bovine	feces	commensal	B1	O163	H19	679	-	stx2a,c/d	-	-	DRR103287	BGIN01000000
SI-P036	2014	Japan	bovine	feces	commensal	B1	O177	H11	ND	-	-	beta1	-	DRR103288	BGIO01000000
SI-P038	2014	Japan	bovine	feces	commensal	E	O132	H18	6118	stx1c	-	-	-	DRR103289	BGIP01000000
SI-P040	2014	Japan	bovine	feces	commensal	B1	O69	H11	6625	stx1a	-	beta1	-	DRR103290	BGIQ01000000
SI-P042	2014	Japan	bovine	feces	commensal	B1	O103	H11	21	stx1a	-	beta1	-	DRR103291	BGIR01000000
SI-P044	2014	Japan	bovine	feces	commensal	B1	O168	H8	718	-	stx2a,c/d	-	-	DRR103292	BGIS01000000
SI-P045	2014	Japan	bovine	feces	commensal	B1	UT	H19	205	stx1a	stx2a	-	-	DRR103293	BGIT01000000
SI-P046	2014	Japan	bovine	feces	commensal	B1	O113	H21	223	-	stx2a,c/d	-	-	DRR103294	BGIU01000000
SI-P051	2014	Japan	bovine	feces	commensal	B1	O182	H25	300	-	-	zeta/zeta3	-	DRR103295	BGIV01000000
SI-P055	2014	Japan	bovine	feces	commensal	B1	O156	H8	1293	-	-	theta	-	DRR103296	BGIW01000000
SI-P063	2014	Japan	bovine	feces	commensal	B1	O6	H34	7907	-	stx2c/d	-	-	DRR103298	BGIY01000000
SI-P065	2014	Japan	bovine	feces	commensal	B1	O15	H2	20	-	-	beta1	-	DRR103299	BGIZ01000000
SI-P066	2014	Japan	bovine	feces	commensal	B1	O96	H19	7543	stx1a	stx2a	-	-	DRR103300	BGJA01000000
SI-P067	2014	Japan	bovine	feces	commensal	A	Onovel25	H40	ND	-	-	theta	-	DRR103301	BGJB01000000
SI-P068	2014	Japan	bovine	feces	commensal	B1	O15	H2	7912	-	-	beta1	-	DRR103302	BGJC01000000
SI-P075	2014	Japan	bovine	feces	commensal	B1	O76	H7	795	-	-	theta	-	DRR103303	BGJD01000000
SI-P076	2014	Japan	bovine	feces	commensal	B1	O76	H7	795	-	stx2a	theta	-	DRR103304	BGJE01000000
SI-P077	2014	Japan	bovine	feces	commensal	D	O145	H28	32	-	-	gamma1	-	DRR103305	BGJF01000000
SI-P078	2014	Japan	bovine	feces	commensal	B1	Onovel21	H2	ND	-	stx2a,c/d	-	-	DRR103306	BGJG01000000
SI-P079	2014	Japan	bovine	feces	commensal	B1	Gp11	H19	ND	stx1a	stx2a,c/d	-	-	DRR103307	BGJH01000000
SI-P082_2	2014	Japan	bovine	feces	commensal	B1	O128	H2	20	-	-	beta1	-	DRR159938	BIFD01000000
SI-P083	2014	Japan	bovine	feces	commensal	B1	Gp11	H19	443	stx1a	stx2a,c/d	-	-	DRR103309	BGJJ01000000
SI-P084	2014	Japan	bovine	feces	commensal	B1	UT	H21	223	-	stx2a,c/d	-	-	DRR103310	BGJK01000000
BE1126	2015	Belgium	bovine	feces	commensal	B1	O174	H2	661	-	-	-	-	DRR102536	BFFR01000000
BE1174	2015	Belgium	bovine	feces	commensal	B1	UT	H7	278	-	-	-	-	DRR102537	BFFS01000000
BE1414	2015	Belgium	bovine	feces	commensal	B1	O150	H8	906	-	-	-	-	DRR102538	BFFT01000000
BE1485	2015	Belgium	bovine	feces	commensal	A	O185	H8	7864	-	-	-	-	DRR102539	BFFU01000000
BE1806	2015	Belgium	bovine	feces	commensal	A	Gp10	H11	10	-	-	-	-	DRR102540	BFFV01000000
BE1816	2015	Belgium	bovine	feces	commensal	UT	O38	H39	5971	-	-	-	-	DRR102541	BFFW01000000
BE2125	2015	Belgium	bovine	feces	commensal	B1	Onovel15	H10	1727	-	-	-	-	DRR102542	BFFX01000000
BE235	2015	Belgium	bovine	feces	commensal	B1	O39	H21	40	-	-	-	-	DRR102543	BFFY01000000
BE244	2015	Belgium	bovine	feces	commensal	A	O93	H19	1510	-	-	-	-	DRR102544	BFFZ01000000
BE2454	2015	Belgium	bovine	feces	commensal	A	O81	H39	10	-	-	-	-	DRR102545	BFGA01000000
BE2485	2015	Belgium	bovine	feces	commensal	B1	O8	H19	1431	-	-	-	-	DRR102546	BFGB01000000
BE2494	2015	Belgium	bovine	feces	commensal	B1	Gp13	H25	58	-	-	-	-	DRR102547	BFGC01000000
BE2525	2015	Belgium	bovine	feces	commensal	B1	O22	H10	4467	-	-	-	-	DRR102548	BFGD01000000
BE2534	2015	Belgium	bovine	feces	commensal	A	O93	H19	2035	-	-	-	-	DRR102549	BFGE01000000
BE2774	2015	Belgium	bovine	feces	commensal	A	UT	H25	10	-	-	-	-	DRR102550	BFGF01000000
BE2805	2015	Belgium	bovine	feces	commensal	B1	Onovel26	H2	7895	-	-	-	-	DRR102551	BFGG01000000
BE2894	2015	Belgium	bovine	feces	commensal	B1	O102	H6	101	-	-	-	-	DRR102552	BFGH01000000
BE2925	2015	Belgium	bovine	feces	commensal	B1	O159	H21	58	-	-	-	-	DRR102553	BFGI01000000
BE325	2015	Belgium	bovine	feces	commensal	B1	O113	H21	56	-	-	-	-	DRR102554	BFGJ01000000
BE454	2015	Belgium	bovine	feces	commensal	B1	O69	H38	7876	-	-	-	-	DRR102555	BFGK01000000
BE565	2015	Belgium	bovine	feces	commensal	A	O8	H26	4977	-	-	-	-	DRR102556	BFGL01000000
BE726	2015	Belgium	bovine	feces	commensal	A	O8	H20	ND	-	-	-	-	DRR102557	BFGM01000000
BE734	2015	Belgium	bovine	feces	commensal	C	O153var1	H12	88	-	-	-	-	DRR102558	BFGN01000000
BE845	2015	Belgium	bovine	feces	commensal	B1	UT	H35	7879	-	-	-	-	DRR102559	BFGO01000000
BE854	2015	Belgium	bovine	feces	commensal	B1	O6	H49	1079	-	-	-	-	DRR102560	BFGP01000000
2-1BK	2018	USA	bovine	feces	commensal	C	O8	H11_fliC_H54_flmA	88*	-	-	-	-	DRR159803	BHZY01000000
3-1BK	2018	USA	bovine	feces	commensal	B1	Gp11	H7	278	-	-	-	-	DRR159814	BIAJ01000000
5-1BK	2018	USA	bovine	feces	commensal	B1	O171	H28	ND	-	-	-	-	DRR159830	BIAZ01000000
6-1BK	2018	USA	bovine	feces	commensal	B1	O109	H21	58	-	-	-	-	DRR159831	BIBA01000000
12-1BK	2018	USA	bovine	feces	commensal	A	O15	H16	325	-	stx2g	-	-	DRR159793	BHZO01000000
13-1BK	2018	USA	bovine	feces	commensal	B1	O108	H25	300	-	-	zeta/zeta3	-	DRR159794	BHZP01000000
14-1BK	2018	USA	bovine	feces	commensal	A	Gp10	H11	10	-	-	-	-	DRR159795	BHZQ01000000
16-1BK	2018	USA	bovine	feces	commensal	A	Gp10	H11	10?	-	-	-	-	DRR159797	BHZS01000000
19-1BK	2018	USA	bovine	feces	commensal	B1	O140	H21	1423	-	-	-	-	DRR159800	BHZV01000000
27-1BK	2018	USA	bovine	feces	commensal	B1	Gp12	H7	351	-	-	-	-	DRR159809	BIAE01000000
28-1BK	2018	USA	bovine	feces	commensal	B1	O10	H2	20	-	-	beta1	-	DRR159810	BIAF01000000
32-1BK	2018	USA	bovine	feces	commensal	B1	O7	H7	1642	-	-	-	-	DRR159815	BIAK01000000
35-1BK	2018	USA	bovine	feces	commensal	E	O157	H7	11	stx1a	stx2a	gamma1	-	DRR159818	BIAN01000000
36-1BK	2018	USA	bovine	feces	commensal	B1	O43	H2	937	-	-	-	-	DRR159819	BIAO01000000
39-1BK	2018	USA	bovine	feces	commensal	B1	O103	H2	17	-	-	epsilon1	-	DRR159822	BIAR01000000
40-1BK	2018	USA	bovine	feces	commensal	B1	O168	H28	2473	-	-	-	-	DRR159823	BIAS01000000
45-1BK	2018	USA	bovine	feces	commensal	B1	O155	H21	58	-	-	-	-	DRR159829	BIAY01000000
01-A55-A	2010	France	bovine	feces	commensal	B1	O171	H25	1049	-	-	-	-	DRR159835	BIBE01000000
02-A71-A	2010	France	bovine	feces	commensal	B1	Onovel27	H8	ND	-	-	-	-	DRR159836	BIBF01000000
03-A75-A	2010	France	bovine	feces	commensal	B1	O26	H11	ND	-	-	beta1	-	DRR159837	BIBG01000000
04-A81-A	2010	France	bovine	feces	commensal	B1	O88	H8	ND	-	-	-	-	DRR159838	BIBH01000000
05-A85-A	2010	France	bovine	feces	commensal	B1	O55	H21	4035	-	-	-	-	DRR159839	BIBI01000000
06-A102-A	2010	France	bovine	feces	commensal	A	Onovel19	H7	3891	-	-	-	-	DRR159840	BIBJ01000000
07-A137-A	2010	France	bovine	feces	commensal	B1	O105	H7	8813	-	-	-	-	DRR159841	BIBK01000000
08-A138-A	2010	France	bovine	feces	commensal	B1	O93	H28	4038	-	-	-	-	DRR159842	BIBL01000000
09-A139-A	2010	France	bovine	feces	commensal	B1	O88	H16	1172	-	-	-	-	DRR159843	BIBM01000000
11-A141-A	2010	France	bovine	feces	commensal	B1	O156	H8	327	-	-	theta	-	DRR159851	BIBU01000000
13-A145-A	2010	France	bovine	feces	commensal	B1	O116	H8	4642	-	-	-	-	DRR159853	BIBW01000000
14-A146-A	2010	France	bovine	feces	commensal	B1	Onovel10	H38	154	-	-	-	-	DRR159854	BIBX01000000
15-B7-A	2010	France	bovine	feces	commensal	B1	O45	H51	ND	-	-	-	-	DRR159855	BIBY01000000
16-B15-A	2010	France	bovine	feces	commensal	D	Gp9	H18	5022	-	-	-	-	DRR159856	BIBZ01000000
17-B22-A	2010	France	bovine	feces	commensal	B1	O8_wzm/wzt_O96_wzx/wzy	H8	109	-	-	-	-	DRR159857	BICA01000000
18-B32-A	2010	France	bovine	feces	commensal	B1	O45	H42	ND	-	-	-	-	DRR159858	BICB01000000
19-B39-A	2010	France	bovine	feces	commensal	B1	UT	H32	ND	-	-	-	-	DRR159859	BICC01000000
20-B54-A	2010	France	bovine	feces	commensal	D	O149	H1	132	-	-	-	-	DRR159860	BICD01000000
21-C8-A	2010	France	bovine	feces	commensal	B1	Onovel30	H38	ND	-	-	-	-	DRR159861	BICE01000000
22-C16-A	2010	France	bovine	feces	commensal	B1	O84	H16	1423	-	-	-	-	DRR159862	BICF01000000
24-C48-A	2010	France	bovine	feces	commensal	B1	O8_wzm/wzt_O40_wzx/wzy	H2	ND	-	-	-	-	DRR159864	BICH01000000
25-C51-A	2010	France	bovine	feces	commensal	B1	O8	H2	392	-	-	-	-	DRR159865	BICI01000000
26-C77-A	2010	France	bovine	feces	commensal	B1	O110	H2	187	-	-	-	-	DRR159866	BICJ01000000
27-C97-A	2010	France	bovine	feces	commensal	B1	O22	H10	6595	-	-	-	-	DRR159867	BICK01000000
28-C100-A	2010	France	bovine	feces	commensal	B1	O58	H40	ND	-	-	-	-	DRR159868	BICL01000000
29-D61-A	2010	France	bovine	feces	commensal	B1	O58	H40	58	-	-	-	-	DRR159869	BICM01000000
30-D80-A	2010	France	bovine	feces	commensal	B1	O149	H2	ND	-	-	-	-	DRR159870	BICN01000000
31-E55-A	2011	France	bovine	feces	commensal	C	O8	H16	1426	-	-	-	-	DRR159871	BICO01000000
32-E63-A	2011	France	bovine	feces	commensal	B1	Onovel30	H38	1616	-	-	-	-	DRR159872	BICP01000000
33-F14-A	2011	France	bovine	feces	commensal	B1	O136	H20	1252	-	-	-	-	DRR159873	BICQ01000000
34-F30-A	2011	France	bovine	feces	commensal	B1	Gp10	H11	ND	-	-	-	-	DRR159874	BICR01000000
35-F52-A	2011	France	bovine	feces	commensal	B1	O102	H38	154	-	-	-	-	DRR159875	BICS01000000
36-F72-A	2011	France	bovine	feces	commensal	B1	O153var2	H10	3858	-	-	-	-	DRR159876	BICT01000000
37-H14-A	2011	France	bovine	feces	commensal	B1	Onovel26	H16	3090	-	-	-	-	DRR159877	BICU01000000
38-H15-A	2011	France	bovine	feces	commensal	A	O6	H33	2524	-	-	-	-	DRR159878	BICV01000000
39-H19-A	2011	France	bovine	feces	commensal	B1	UT	H10	441	-	-	-	-	DRR159879	BICW01000000
40-H35-A	2011	France	bovine	feces	commensal	B1	Gp11	H7	4398	-	-	-	-	DRR159880	BICX01000000
41-H52-A	2011	France	bovine	feces	commensal	E	O27	H30	753	-	-	-	-	DRR159881	BICY01000000
42-H55-A	2011	France	bovine	feces	commensal	B1	O82	H8	101	-	-	-	-	DRR159882	BICZ01000000
43-H65-A	2011	France	bovine	feces	commensal	B1	O146	H21	442	-	-	-	-	DRR159883	BIDA01000000
44-H78-B	2011	France	bovine	feces	commensal	D	O7	H18	38	-	-	-	-	DRR159884	BIDB01000000
45-H100-A	2011	France	bovine	feces	commensal	B1	O110	H2	187	-	-	-	-	DRR159885	BIDC01000000
46-I43-A	2011	France	bovine	feces	commensal	D	O7	H18	38	-	-	-	-	DRR159886	BIDD01000000
48-I79-A	2011	France	bovine	feces	commensal	B1	O120	H25	58	-	-	-	-	DRR159887	BIDE01000000
49-J25-A	2011	France	bovine	feces	commensal	B1	O26	H11	29	-	-	beta1	-	DRR159888	BIDF01000000
50-J32-A	2011	France	bovine	feces	commensal	B1	O179	H8	297	-	-	-	-	DRR159889	BIDG01000000
51-J57-A	2011	France	bovine	feces	commensal	B1	O8	H16	2602	-	-	-	-	DRR159890	BIDH01000000
52-J58-A	2011	France	bovine	feces	commensal	B1	O91	H7	1304	-	-	-	-	DRR159891	BIDI01000000
54-J118-A	2011	France	bovine	feces	commensal	B1	O8_wzm/wzt_O40_wzx/wzy	H2	1001	-	-	-	-	DRR159893	BIDK01000000
55-J122-A	2011	France	bovine	feces	commensal	B1	UT	H19	205	-	-	-	-	DRR159894	BIDL01000000
56-K145-A	2011	France	bovine	feces	commensal	A	O159	H4	10	-	-	-	-	DRR159895	BIDM01000000
57-K120-A	2011	France	bovine	feces	commensal	B1	O105	H4	642	-	-	-	-	DRR159896	BIDN01000000
58-K131-A	2011	France	bovine	feces	commensal	B1	O82	H8	101	-	-	-	-	DRR159897	BIDO01000000
59-K139-A	2011	France	bovine	feces	commensal	B1	O88	H25	58	-	-	-	-	DRR159898	BIDP01000000
61-K142-A	2011	France	bovine	feces	commensal	B1	O150	H8	906	-	-	-	-	DRR159900	BIDR01000000
62-L26-A	2011	France	bovine	feces	commensal	B1	O146	H21_fliC_H47_flkA	442	-	-	-	-	DRR159901	BIDS01000000
63-L27-A	2011	France	bovine	feces	commensal	D	O11	H15	ND	-	-	-	-	DRR159902	BIDT01000000
65-L97-A	2011	France	bovine	feces	commensal	B1	O149	H2	388	-	-	-	-	DRR159904	BIDV01000000
66-L112-A	2011	France	bovine	feces	commensal	B1	Onovel3	H7	101	-	-	-	-	DRR159905	BIDW01000000
67-L119-A	2011	France	bovine	feces	commensal	B1	O76	H19	675	stx1d	-	-	-	DRR159906	BIDX01000000
68-A119-A	2010	France	bovine	feces	commensal	D	O149	H1	132	stx1d	-	-	-	DRR159907	BIDY01000000
69-C61-A	2010	France	bovine	feces	commensal	E	O121	H15	5289	stx1d	-	-	-	DRR159908	BIDZ01000000
70-J76-A	2011	France	bovine	feces	commensal	B1	O153var2	H21	8694	-	stx2c/d	-	-	DRR159909	BIEA01000000
71-G15-A	2011	France	bovine	feces	commensal	B1	O174	H21	677	-	stx2c/d	-	-	DRR159910	BIEB01000000
72-B56-55-1	2018	France	bovine	feces	commensal	B1	O177	H11	765	-	-	beta1	-	DRR159911	BIEC01000000
73-B166-1-9	2018	France	bovine	feces	commensal	A	O177	H25	342	-	stx2c/d	beta1	-	DRR159912	BIED01000000
74-B166-80-1	2018	France	bovine	feces	commensal	B1	O177	H11	765	-	-	beta1	-	DRR159913	BIEE01000000
75-A113-A	2010	France	bovine	feces	commensal	B1	UT	H42	164	-	-	-	-	DRR159914	BIEF01000000
76-A58-A	2010	France	bovine	feces	commensal	B1	UT	H40	58	-	-	-	-	DRR159915	BIEG01000000
77-A77-A	2010	France	bovine	feces	commensal	B1	UT	H40	58	-	-	-	-	DRR159916	BIEH01000000
78-A86-A	2010	France	bovine	feces	commensal	B1	UT	H7	2521	-	-	-	-	DRR159917	BIEI01000000
79-B3-B	2010	France	bovine	feces	commensal	B1	UT	H42	164	-	-	-	-	DRR159918	BIEJ01000000
80-C117-A	2010	France	bovine	feces	commensal	B1	UT	H7	278	-	-	-	-	DRR159919	BIEK01000000
81-C29-A	2010	France	bovine	feces	commensal	B1	UT	H28	1610	-	-	-	-	DRR159920	BIEL01000000
82-F63-A	2011	France	bovine	feces	commensal	B1	O184	H48	1172	-	-	-	-	DRR159921	BIEM01000000
83-G22-A	2011	France	bovine	feces	commensal	B1	UT	H7	ND	-	-	-	-	DRR159922	BIEN01000000
84-G79-A	2011	France	bovine	feces	commensal	B1	UT	H19	7289	-	-	-	-	DRR159923	BIEO01000000
85-H101-A	2011	France	bovine	feces	commensal	B1	UT	H8	164	-	-	-	-	DRR159924	BIEP01000000
86-H105-A	2011	France	bovine	feces	commensal	B1	UT	H21	1423?	-	-	-	-	DRR159925	BIEQ01000000
87-H115-A	2011	France	bovine	feces	commensal	A	UT	H12	4767	-	-	-	-	DRR159926	BIER01000000
88-H13-A	2011	France	bovine	feces	commensal	A	UT	H32	10	-	-	-	-	DRR159927	BIES01000000
89-H37-A	2011	France	bovine	feces	commensal	B1	UT	H8	906	-	-	-	-	DRR159928	BIET01000000
90-H99-A	2011	France	bovine	feces	commensal	B1	O8	H21	345*	-	-	-	-	DRR159929	BIEU01000000
91-I113-A	2011	France	bovine	feces	commensal	B1	UT	H7	ND	-	-	-	-	DRR159930	BIEV01000000
92-I114-A	2011	France	bovine	feces	commensal	B1	UT	H19	201	-	-	-	-	DRR159931	BIEW01000000
93-I92-A	2011	France	bovine	feces	commensal	A	UT	H27	398	-	-	-	-	DRR159932	BIEX01000000
94-J43-A	2011	France	bovine	feces	commensal	A	UT	H32	10	-	-	-	-	DRR159933	BIEY01000000
95-J49-A	2011	France	bovine	feces	commensal	D	UT	H48	1400	-	-	-	-	DRR159934	BIEZ01000000
96-J77-A	2011	France	bovine	feces	commensal	B1	UT	H38	154*	-	-	-	-	DRR159935	BIFA01000000
97-K106-A_1	2011	France	bovine	feces	commensal	B1	O8	H19	ND	-	-	-	-	DRR159936	BIFB01000000
99-K118-A	2011	France	bovine	feces	commensal	B1	UT	H7	1308	-	-	-	-	DRR159937	BIFC01000000
100-K146-A	2011	France	bovine	feces	commensal	B1	O8	H8	ND	-	-	-	-	DRR159844	BIBN01000000
101-K50-A	2011	France	bovine	feces	commensal	B1	UT	H42	164	-	-	-	-	DRR159845	BIBO01000000
102-K56-A	2011	France	bovine	feces	commensal	B1	UT	H8	906	-	-	-	-	DRR159846	BIBP01000000
103-L154-A	2011	France	bovine	feces	commensal	B1	UT	H40	58	-	-	-	-	DRR159847	BIBQ01000000
105-L71-A	2011	France	bovine	feces	commensal	B1	O15	H21	ND	-	-	-	-	DRR159849	BIBS01000000
HUST146	2008	Japan	human	feces	commensal	B2	O6	H1	73	-	-	-	-	DRR102674	BFKZ01000000
HUST147	2008	Japan	human	feces	commensal	B2	O1	H7	95	-	-	-	-	DRR102675	BFLA01000000
HUST148	2008	Japan	human	feces	commensal	B2	O75	H5	550	-	-	-	-	DRR102676	BFLB01000000
HUST150	2008	Japan	human	feces	commensal	F	O1	H7	59	-	-	-	-	DRR102677	BFLC01000000
HUST151	2008	Japan	human	feces	commensal	B2	Gp10	H4	357	-	-	-	-	DRR102678	BFLD01000000
HUST153	2008	Japan	human	feces	commensal	B1	O174	H28	156	-	-	-	-	DRR102679	BFLE01000000
HUST159	2009	Japan	human	feces	commensal	B2	Onovel31	H4	131	-	-	-	-	DRR102680	BFLF01000000
HUST161	2009	Japan	human	feces	commensal	B2	Gp10	H4	357	-	-	-	-	DRR102681	BFLG01000000
HUST163	2009	Japan	human	feces	commensal	D	O1	H15	315	-	-	-	-	DRR102682	BFLH01000000
HUST164	2009	Japan	human	feces	commensal	B2	Gp10	H4	357	-	-	-	-	DRR102683	BFLI01000000
HUST165	2009	Japan	human	feces	commensal	A	O11	H25	635	-	-	-	-	DRR102684	BFLJ01000000
HUST168	2009	Japan	human	feces	commensal	F	O11	H45	457	-	-	-	-	DRR102685	BFLK01000000
HUST169	2009	Japan	human	feces	commensal	B2	O16	H5	131	-	-	-	-	DRR102686	BFLL01000000
HUST170	2009	Japan	human	feces	commensal	A	O125	H30	399	-	-	-	-	DRR102687	BFLM01000000
HUST171	2009	Japan	human	feces	commensal	A	O128	H12	472	-	-	-	-	DRR102688	BFLN01000000
HUST172	2009	Japan	human	feces	commensal	F	O175	H45	4353	-	-	-	-	DRR102689	BFLO01000000
HUST173	2009	Japan	human	feces	commensal	B2	O83	H4	429	-	-	-	-	DRR102690	BFLP01000000
HUST174	2009	Japan	human	feces	commensal	D	O23	H4	1882	-	-	-	-	DRR102691	BFLQ01000000
HUST176	2009	Japan	human	feces	commensal	B2	O75	H5	550	-	-	-	-	DRR102692	BFLR01000000
HUST177	2009	Japan	human	feces	commensal	B2	Gp10	H4	357	-	-	-	-	DRR102693	BFLS01000000
HUST181	2009	Japan	human	feces	commensal	B2	GP10	H4	357	-	-	-	-	DRR102694	BFLT01000000
HUST182	2009	Japan	human	feces	commensal	D	Onovel31	H4	69	-	-	-	-	DRR102695	BFLU01000000
HUST183	2009	Japan	human	feces	commensal	B1	O74	H8	906	-	-	-	-	DRR102696	BFLV01000000
HUST184	2009	Japan	human	feces	commensal	A	O71	H12	5295	-	-	-	-	DRR102697	BFLW01000000
HUST186	2009	Japan	human	feces	commensal	B2	Gp10	H4	357	-	-	-	-	DRR102698	BFLX01000000
HUST187	2009	Japan	human	feces	commensal	B2	O83	H1	2554	-	-	-	-	DRR102699	BFLY01000000
HUST190	2009	Japan	human	feces	commensal	F	O161	H4	117	-	-	-	-	DRR102700	BFLZ01000000
HUST191	2009	Japan	human	feces	commensal	E	O45	H19	371	-	-	-	-	DRR102701	BFMA01000000
HUST192	2009	Japan	human	feces	commensal	A	O148	H30	2967	-	-	-	-	DRR102702	BFMB01000000
JML001	2015	Japan	human	feces	commensal	B1	O153var1	H21	ND	-	-	theta	-	DRR102703	BFMC01000000
JML003	2015	Japan	human	feces	commensal	B1	UT	H37	ND	-	-	-	-	DRR102704	BFMD01000000
JML005	2015	Japan	human	feces	commensal	B2	Gp10	H4	ND	-	-	-	-	DRR102705	BFME01000000
JML006	2015	Japan	human	feces	commensal	B2	Gp8	H5	ND	-	-	-	-	DRR102706	BFMF01000000
JML007	2015	Japan	human	feces	commensal	B1	O8	H8	ND	-	-	-	-	DRR102707	BFMG01000000
JML008	2015	Japan	human	feces	commensal	B2	Gp7	H4	ND	-	-	-	-	DRR102708	BFMH01000000
JML009	2015	Japan	human	feces	commensal	F	O11	H6	ND	-	-	-	-	DRR102709	BFMI01000000
JML010	2015	Japan	human	feces	commensal	A	O27	H12	607	-	-	-	-	DRR102710	BFMJ01000000
JML012	2015	Japan	human	feces	commensal	F	O11	H25	457	-	-	-	-	DRR102711	BFMK01000000
JML014	2015	Japan	human	feces	commensal	B2	O16	H5	8511*?	-	-	-	-	DRR102712	BFML01000000
JML015	2015	Japan	human	feces	commensal	B2	Gp10	H4	ND	-	-	-	-	DRR102713	BFMM01000000
JML016	2015	Japan	human	feces	commensal	B2	O1	H1	ND	-	-	-	-	DRR102714	BFMN01000000
JML017	2015	Japan	human	feces	commensal	B2	O75	H5	ND	-	-	-	-	DRR102715	BFMO01000000
JML018	2015	Japan	human	feces	commensal	B1	UT	H16	ND	-	-	-	-	DRR102716	BFMP01000000
JML019	2015	Japan	human	feces	commensal	B1	UT	H14	ND	-	-	-	-	DRR102717	BFMQ01000000
JML020	2015	Japan	human	feces	commensal	B2	O83	H7	636*?	-	-	-	-	DRR102718	BFMR01000000
JML021	2015	Japan	human	feces	commensal	B1	Onovel4	H21	ND	-	-	-	-	DRR102719	BFMS01000000
JML022	2015	Japan	human	feces	commensal	B2	Gp10	H4	ND	-	-	-	-	DRR102720	BFMT01000000
JML023	2015	Japan	human	feces	commensal	B2	O75	H5	ND	-	-	-	-	DRR102721	BFMU01000000
JML024	2015	Japan	human	feces	commensal	B2	O1	H7	ND	-	-	-	-	DRR102722	BFMV01000000
JML025	2015	Japan	human	feces	commensal	B2	O16	H5	ND	-	-	-	-	DRR102723	BFMW01000000
JML027	2015	Japan	human	feces	commensal	B2	Gp10	H4	357*?	-	-	-	-	DRR102724	BFMX01000000
JML028	2015	Japan	human	feces	commensal	B2	Gp7	H7	ND	-	-	-	-	DRR102725	BFMY01000000
JML029	2015	Japan	human	feces	commensal	B1	O113	H7	ND	-	-	-	-	DRR102726	BFMZ01000000
JML030	2015	Japan	human	feces	commensal	D	Gp9	H41	ND	-	-	-	-	DRR102727	BFNA01000000
JML031	2015	Japan	human	feces	commensal	B2	O16	H5	ND	-	-	-	-	DRR102728	BFNB01000000
JML033	2015	Japan	human	feces	commensal	B1	O168	H8	ND	-	-	-	-	DRR102729	BFNC01000000
JML034	2015	Japan	human	feces	commensal	B2	Onovel31	H4	ND	-	-	-	-	DRR102730	BFND01000000
JML035	2015	Japan	human	feces	commensal	D	O166	H15	ND	-	-	-	-	DRR102731	BFNE01000000
JML036	2015	Japan	human	feces	commensal	B2	O75	H5	6480*?	-	-	-	-	DRR102732	BFNF01000000
JML037	2015	Japan	human	feces	commensal	B2	O6	H5	ND	-	-	-	-	DRR102733	BFNG01000000
JML039	2015	Japan	human	feces	commensal	B1	O146	H19	7877	-	-	-	-	DRR102734	BFNH01000000
JML040	2015	Japan	human	feces	commensal	B2	O1	H1	ND	-	-	-	-	DRR102735	BFNI01000000
JML043	2015	Japan	human	feces	commensal	B2	Gp7	H7	95	-	-	-	-	DRR102737	BFNK01000000
JML044	2015	Japan	human	feces	commensal	B1	Onovel8	H10	ND	-	-	-	-	DRR102738	BFNL01000000
JML045	2015	Japan	human	feces	commensal	B2	Gp10	H4	357	-	-	-	-	DRR102739	BFNM01000000
JML046	2015	Japan	human	feces	commensal	E	O27	H46	7297	-	-	-	-	DRR102740	BFNN01000000
JML047	2015	Japan	human	feces	commensal	D	UT	H15	349	-	-	-	-	DRR102741	BFNO01000000
JML048	2015	Japan	human	feces	commensal	D	Gp9	H18	69	-	-	-	-	DRR102742	BFNP01000000
JML050	2015	Japan	human	feces	commensal	B2	Gp10	H4	538	-	-	-	-	DRR102744	BFNR01000000
JML051	2015	Japan	human	feces	commensal	B2	Gp10	H4	357?	-	-	-	-	DRR102745	BFNS01000000
JML052	2015	Japan	human	feces	commensal	A	O175	H23	8576	-	-	-	-	DRR102746	BFNT01000000
JML053	2015	Japan	human	feces	commensal	B2	Gp10	H4	357?	-	-	-	-	DRR102747	BFNU01000000
JML054	2015	Japan	human	feces	commensal	B2	O75	H5	ND	-	-	-	-	DRR102748	BFNV01000000
JML055	2015	Japan	human	feces	commensal	B2	O120	H5	1161	-	-	-	-	DRR102749	BFNW01000000
JML056	2015	Japan	human	feces	commensal	B2	Onovel31	H4	131	-	-	-	-	DRR102750	BFNX01000000
JML057	2015	Japan	human	feces	commensal	B1	O64	H25	58	-	-	-	-	DRR102751	BFNY01000000
JML058	2015	Japan	human	feces	commensal	B1	O8	H19	2563	-	-	-	-	DRR102752	BFNZ01000000
JML059	2015	Japan	human	feces	commensal	B2	Gp10	H4	357	-	-	-	-	DRR102753	BFOA01000000
JML060	2015	Japan	human	feces	commensal	B2	Onovel31	H4	131	-	-	-	-	DRR102754	BFOB01000000
JML061	2015	Japan	human	feces	commensal	D	O15	H18	69	-	-	-	-	DRR102755	BFOC01000000
JML062	2015	Japan	human	feces	commensal	D	O45	H15	1177	-	-	-	-	DRR102756	BFOD01000000
JML063	2015	Japan	human	feces	commensal	B2	O175	H45	7887?	-	-	-	-	DRR102757	BFOE01000000
JML064	2015	Japan	human	feces	commensal	B2	O1	H1	95	-	-	-	-	DRR102758	BFOF01000000
JML065	2015	Japan	human	feces	commensal	D	O7	H18	38	-	-	-	-	DRR102759	BFOG01000000
JML066	2015	Japan	human	feces	commensal	B2	O83	H7	636	-	-	-	-	DRR102760	BFOH01000000
JML067	2015	Japan	human	feces	commensal	A	O128	H12	5511	-	-	-	-	DRR102761	BFOI01000000
JML068	2015	Japan	human	feces	commensal	B1	Onovel5	H21	1248	-	-	-	-	DRR102762	BFOJ01000000
JML069	2015	Japan	human	feces	commensal	D	UT	H18	7892	-	-	-	-	DRR102763	BFOK01000000
JML070	2015	Japan	human	feces	commensal	UT	O176	H9	7884	-	-	-	-	DRR102764	BFOL01000000
JML071	2015	Japan	human	feces	commensal	D	O7	H15	4771*?	-	-	-	-	DRR102765	BFOM01000000
JML072	2015	Japan	human	feces	commensal	D	O175	H15	5652	-	-	-	-	DRR102766	BFON01000000
JML074	2015	Japan	human	feces	commensal	D	O45	H15	1177	-	-	-	-	DRR102767	BFOO01000000
JML075	2015	Japan	human	feces	commensal	B2	O75	H5	1193	-	-	-	-	DRR102768	BFOP01000000
JML076	2015	Japan	human	feces	commensal	C	O8_wzm/wzt_O30_wzx/wzy	H12	88	-	-	-	-	DRR102769	BFOQ01000000
JML077	2015	Japan	human	feces	commensal	D	UT	H15	349	-	-	-	-	DRR102770	BFOR01000000
JML078	2015	Japan	human	feces	commensal	F	O11	H6	ND	-	-	-	-	DRR102771	BFOS01000000
JML079	2015	Japan	human	feces	commensal	B1	O21	H21	56	-	-	-	-	DRR102772	BFOT01000000
JML080	2015	Japan	human	feces	commensal	B1	O116	H28	7865	-	-	-	-	DRR102773	BFOU01000000
JML081	2015	Japan	human	feces	commensal	F	O36	H42	7878	-	-	-	-	DRR102774	BFOV01000000
JML082	2015	Japan	human	feces	commensal	D	O7	H15	70	-	-	-	-	DRR102775	BFOW01000000
JML083	2015	Japan	human	feces	commensal	F	O11	H6	457	-	-	-	-	DRR102776	BFOX01000000
JML084	2015	Japan	human	feces	commensal	D	UT	H14	1406?	-	-	-	-	DRR102777	BFOY01000000
JML086	2015	Japan	human	feces	commensal	D	O15	H18	69	-	-	-	-	DRR102778	BFOZ01000000
JML087	2015	Japan	human	feces	commensal	B2	Gp10	H4	538	-	-	-	-	DRR102779	BFPA01000000
JML088	2015	Japan	human	feces	commensal	A	O12	H12	472	-	-	-	-	DRR102780	BFPB01000000
JML089	2015	Japan	human	feces	commensal	B2	Gp10	H4	357	-	-	-	-	DRR102781	BFPC01000000
JML090	2015	Japan	human	feces	commensal	B2	O6	H1	73	-	-	-	-	DRR102782	BFPD01000000
JML091	2015	Japan	human	feces	commensal	B2	Gp6	H31	420	-	-	-	-	DRR102783	BFPE01000000
JML092	2015	Japan	human	feces	commensal	B2	O6	H1	73	-	-	-	-	DRR102784	BFPF01000000
JML093	2015	Japan	human	feces	commensal	B2	Gp10	H4	357	-	-	-	-	DRR102785	BFPG01000000
JML094	2015	Japan	human	feces	commensal	D	O86	H18	38	-	-	-	-	DRR102786	BFPH01000000
JML095	2015	Japan	human	feces	commensal	B2	Onovel1	H45	1643	-	-	-	-	DRR102787	BFPI01000000
JML096	2015	Japan	human	feces	commensal	B2	Gp7	H7	95?	-	-	-	-	DRR102788	BFPJ01000000
JML097	2015	Japan	human	feces	commensal	B2	O120	H5	1161	-	-	-	-	DRR102789	BFPK01000000
JML098	2015	Japan	human	feces	commensal	B2	Gp7	H7	95	-	-	-	-	DRR102790	BFPL01000000
JML099	2015	Japan	human	feces	commensal	B2	O83	H1	2554	-	-	-	-	DRR102791	BFPM01000000
JML100	2015	Japan	human	feces	commensal	F	UT	H25	ND	-	-	-	-	DRR102792	BFPN01000000
JML102	2015	Japan	human	feces	commensal	B2	O6	H1	73	-	-	-	-	DRR102794	BFPP01000000
JML103	2015	Japan	human	feces	commensal	B2	Gp7	H7	95	-	-	-	-	DRR102795	BFPQ01000000
JML104	2015	Japan	human	feces	commensal	D	Gp9	H18	7401*	-	-	-	-	DRR102796	BFPR01000000
JML105	2015	Japan	human	feces	commensal	B2	UT	H1	135?	-	-	-	-	DRR102797	BFPS01000000
JML107	2015	Japan	human	feces	commensal	B2	Gp10	H4	357	-	-	-	-	DRR102798	BFPT01000000
JML108	2015	Japan	human	feces	commensal	B2	UT	H27	ND	-	-	-	-	DRR102799	BFPU01000000
JML109	2015	Japan	human	feces	commensal	B2	Gp10	H4	357	-	-	-	-	DRR102800	BFPV01000000
JML110	2015	Japan	human	feces	commensal	B2	Onovel31	H4	131	-	-	-	-	DRR102801	BFPW01000000
JML111	2015	Japan	human	feces	commensal	B2	Gp10	H4	357	-	-	-	-	DRR102802	BFPX01000000
JML113	2015	Japan	human	feces	commensal	D	UT	H15	349	-	-	-	-	DRR102803	BFPY01000000
JML114	2015	Japan	human	feces	commensal	B2	O6	H1	73	-	-	-	-	DRR102804	BFPZ01000000
JML115	2015	Japan	human	feces	commensal	B2	O83	H1	2554	-	-	-	-	DRR102805	BFQA01000000
JML116	2015	Japan	human	feces	commensal	B2	UT	H5	7881	-	-	-	-	DRR102806	BFQB01000000
JML117	2015	Japan	human	feces	commensal	A	UT	H55	409	-	-	-	-	DRR102807	BFQC01000000
JML119	2015	Japan	human	feces	commensal	B2	Onovel31	H4	131	-	-	-	-	DRR102808	BFQD01000000
JML120	2015	Japan	human	feces	commensal	B2	Gp10	H4	357	-	-	-	-	DRR102809	BFQE01000000
JML121	2015	Japan	human	feces	commensal	B2	O6	H1	73	-	-	-	-	DRR102810	BFQF01000000
JML122	2015	Japan	human	feces	commensal	B2	O6	H1	73	-	-	-	-	DRR102811	BFQG01000000
JML123	2015	Japan	human	feces	commensal	B2	Gp10	H4	357	-	-	-	-	DRR102812	BFQH01000000
JML125	2015	Japan	human	feces	commensal	B2	Gp10	H4	ND	-	-	-	-	DRR102813	BFQI01000000
JML126	2015	Japan	human	feces	commensal	B2	O4	H5	12	-	-	-	-	DRR102814	BFQJ01000000
JML128	2015	Japan	human	feces	commensal	D	UT	H15	70*?	-	-	-	-	DRR102815	BFQK01000000
JML130	2015	Japan	human	feces	commensal	D	O110	H26	2811	-	-	-	-	DRR102816	BFQL01000000
JML131	2015	Japan	human	feces	commensal	B2	O39	H4	91?	-	-	-	-	DRR102817	BFQM01000000
JML132	2015	Japan	human	feces	commensal	B2	O120	H1	104	-	-	-	-	DRR102818	BFQN01000000
JML133	2015	Japan	human	feces	commensal	B2	Onovel31	H4	131?	-	-	-	-	DRR102819	BFQO01000000
JML134	2015	Japan	human	feces	commensal	D	UT	H6	ND	-	-	-	-	DRR102820	BFQP01000000
JML135	2015	Japan	human	feces	commensal	B2	Onovel31	H4	131	-	-	-	-	DRR102821	BFQQ01000000
JML136	2015	Japan	human	feces	commensal	B2	UT	H5	7881?	-	-	-	-	DRR102822	BFQR01000000
JML137	2015	Japan	human	feces	commensal	B2	Gp10	H4	357*	-	-	-	-	DRR102823	BFQS01000000
JML138	2015	Japan	human	feces	commensal	A	O12	H4	ND	-	-	-	-	DRR102824	BFQT01000000
JML139	2015	Japan	human	feces	commensal	B2	O75	H5	ND	-	-	-	-	DRR102825	BFQU01000000
JML141	2015	Japan	human	feces	commensal	B2	O16	H5	131	-	-	-	-	DRR102826	BFQV01000000
JML142	2015	Japan	human	feces	commensal	B2	UT	H14	4119	-	-	beta2	-	DRR102827	BFQW01000000
JML143	2015	Japan	human	feces	commensal	B2	O1	H7	95	-	-	-	-	DRR102828	BFQX01000000
JML144	2015	Japan	human	feces	commensal	B2	Gp10	H5	676	-	-	-	-	DRR102829	BFQY01000000
JML145	2015	Japan	human	feces	commensal	B2	Onovel31	H4	2279?	-	-	-	-	DRR102830	BFQZ01000000
JML146	2015	Japan	human	feces	commensal	B2	Gp12	H7	ND	-	-	-	-	DRR102831	BFRA01000000
JML147	2015	Japan	human	feces	commensal	B2	Gp6	H31	ND	-	-	-	-	DRR102832	BFRB01000000
JML148	2015	Japan	human	feces	commensal	B2	Gp12	H7	95?	-	-	-	-	DRR102833	BFRC01000000
JML149	2015	Japan	human	feces	commensal	A	UT	H12	7880*?	-	-	-	-	DRR102834	BFRD01000000
JML150	2015	Japan	human	feces	commensal	B1	O174	H40	ND	-	-	-	-	DRR102835	BFRE01000000
JML151	2015	Japan	human	feces	commensal	B2	O179	H31	1092	-	-	zeta/zeta3	-	DRR102836	BFRF01000000
JML153	2015	Japan	human	feces	commensal	B2	O83	H31	ND	-	-	-	-	DRR102837	BFRG01000000
JML154	2015	Japan	human	feces	commensal	B2	Gp10	H4	357	-	-	-	-	DRR102838	BFRH01000000
JML155	2015	Japan	human	feces	commensal	D	Onovel29	H48	1567	-	-	-	-	DRR102839	BFRI01000000
JML156	2015	Japan	human	feces	commensal	B2	Onovel31	H4	ND	-	-	-	-	DRR102840	BFRJ01000000
JML158	2015	Japan	human	feces	commensal	B2	Gp10	H4	357	-	-	-	-	DRR102841	BFRK01000000
JML159	2015	Japan	human	feces	commensal	B2	Gp12	H7	95	-	-	-	-	DRR102842	BFRL01000000
JML160	2015	Japan	human	feces	commensal	B2	Gp10	H4	ND	-	-	-	-	DRR102843	BFRM01000000
JML162	2015	Japan	human	feces	commensal	B2	Gp10	H4	357	-	-	-	-	DRR102844	BFRN01000000
JML163	2015	Japan	human	feces	commensal	B1	UT	H28	ND	-	-	-	-	DRR102845	BFRO01000000
JML164	2015	Japan	human	feces	commensal	B2	O1	H1	7898	-	-	-	-	DRR102846	BFRP01000000
JML165	2015	Japan	human	feces	commensal	B2	UT	H5	550?	-	-	-	-	DRR102847	BFRQ01000000
JML166	2015	Japan	human	feces	commensal	B2	Gp10	H4	357	-	-	-	-	DRR102848	BFRR01000000
JML167	2015	Japan	human	feces	commensal	A	Onovel15	H16	ND	-	-	-	-	DRR102849	BFRS01000000
JML168	2015	Japan	human	feces	commensal	B2	Gp12	H7	ND	-	-	-	-	DRR102850	BFRT01000000
JML171	2015	Japan	human	feces	commensal	B2	Onovel31	H4	ND	-	-	-	-	DRR102851	BFRU01000000
JML172	2015	Japan	human	feces	commensal	B2	O16	H5	ND	-	-	-	-	DRR102852	BFRV01000000
JML173	2015	Japan	human	feces	commensal	B2	UT	H5	550	-	-	-	-	DRR102853	BFRW01000000
JML174	2015	Japan	human	feces	commensal	B1	O147	H7	7904	-	-	-	-	DRR102854	BFRX01000000
JML175	2015	Japan	human	feces	commensal	B2	UT	H1	73	-	-	-	-	DRR102855	BFRY01000000
JML176	2015	Japan	human	feces	commensal	B2	UT	H4	357	-	-	-	-	DRR102856	BFRZ01000000
JML178	2015	Japan	human	feces	commensal	B2	UT	H7	95	-	-	-	-	DRR102857	BFSA01000000
JML181	2015	Japan	human	feces	commensal	B2	O4	H5	12	-	-	-	-	DRR102858	BFSB01000000
JML182	2015	Japan	human	feces	commensal	B2	O1	H1	ND	-	-	-	-	DRR102859	BFSC01000000
JML183	2015	Japan	human	feces	commensal	B2	Gp10	H5	ND	-	-	-	-	DRR102860	BFSD01000000
JML184	2015	Japan	human	feces	commensal	D	O15	H18	69	-	-	-	-	DRR102861	BFSE01000000
JML185	2015	Japan	human	feces	commensal	B1	UT	H28	ND	-	-	-	-	DRR102862	BFSF01000000
JML186	2015	Japan	human	feces	commensal	B2	O16	H5	131	-	-	-	-	DRR102863	BFSG01000000
JML187	2015	Japan	human	feces	commensal	B2	Gp10	H4	357	-	-	-	-	DRR102864	BFSH01000000
JML188	2015	Japan	human	feces	commensal	B2	UT	H5	2593?	-	-	-	-	DRR102865	BFSI01000000
JML189	2015	Japan	human	feces	commensal	B2	Onovel31	H4	131	-	-	-	-	DRR102866	BFSJ01000000
JML191	2015	Japan	human	feces	commensal	D	O7	H15	70*?	-	-	-	-	DRR102867	BFSK01000000
JML192	2015	Japan	human	feces	commensal	B1	O8	H7	ND	-	-	-	-	DRR102868	BFSL01000000
JML193	2015	Japan	human	feces	commensal	B1	O110	H28	ND	-	-	-	-	DRR102869	BFSM01000000
JML195	2015	Japan	human	feces	commensal	D	UT	H15	349	-	-	-	-	DRR102870	BFSN01000000
JML196	2015	Japan	human	feces	commensal	D	O1	H6	68*	-	-	-	-	DRR102871	BFSO01000000
JML197	2015	Japan	human	feces	commensal	B2	O25	H1	73?	-	-	-	-	DRR102872	BFSP01000000
JML199	2015	Japan	human	feces	commensal	B1	O171	H23	224?	-	-	-	-	DRR102873	BFSQ01000000
JML200	2015	Japan	human	feces	commensal	F	O59	H34	2640	-	-	-	-	DRR102874	BFSR01000000
JML201	2015	Japan	human	feces	commensal	B2	O1	H1	95?	-	-	-	-	DRR102875	BFSS01000000
JML202	2015	Japan	human	feces	commensal	D	UT	H15	349*?	-	-	-	-	DRR102876	BFST01000000
JML203	2015	Japan	human	feces	commensal	B2	O120	H5	ND	-	-	-	-	DRR102877	BFSU01000000
JML204	2015	Japan	human	feces	commensal	F	O180	H4	ND	-	-	-	-	DRR102878	BFSV01000000
JML206	2015	Japan	human	feces	commensal	B2	Gp10	H4	357	-	-	-	-	DRR102879	BFSW01000000
JML207	2015	Japan	human	feces	commensal	F	O153var1	H25	1722?	-	-	-	-	DRR102880	BFSX01000000
JML208	2015	Japan	human	feces	commensal	D	O166	H15	349	-	-	-	-	DRR102881	BFSY01000000
JML210	2015	Japan	human	feces	commensal	B2	Gp10	H4	ND	-	-	-	-	DRR102882	BFSZ01000000
JML211	2015	Japan	human	feces	commensal	B2	Gp12	H7	95*?	-	-	-	-	DRR102883	BFTA01000000
JML212	2015	Japan	human	feces	commensal	B2	O25	H1	ND	-	-	-	-	DRR102884	BFTB01000000
JML213	2015	Japan	human	feces	commensal	A	Onovel32	H4	ND	-	-	-	-	DRR102885	BFTC01000000
JML217	2015	Japan	human	feces	commensal	D	O120	H14	6321*?	-	-	-	-	DRR102886	BFTD01000000
JML218	2015	Japan	human	feces	commensal	A	O150	H20	191?	-	-	-	-	DRR102887	BFTE01000000
JML219	2015	Japan	human	feces	commensal	B2	Onovel31	H4	131*?	-	-	-	-	DRR102888	BFTF01000000
JML221	2015	Japan	human	feces	commensal	B2	O75	H5	ND	-	-	-	-	DRR102889	BFTG01000000
JML222	2015	Japan	human	feces	commensal	D	Onovel31	H18	ND	-	-	-	-	DRR102890	BFTH01000000
JML223	2015	Japan	human	feces	commensal	B2	Gp12	H7	416*?	-	-	-	-	DRR102891	BFTI01000000
JML224	2015	Japan	human	feces	commensal	B2	Gp10	H4	357*?	-	-	-	-	DRR102892	BFTJ01000000
JML225	2015	Japan	human	feces	commensal	B2	Gp7	H5	95?	-	-	-	-	DRR102893	BFTK01000000
JML226	2015	Japan	human	feces	commensal	B2	Gp7	H1	ND	-	-	-	-	DRR102894	BFTL01000000
JML227	2015	Japan	human	feces	commensal	B2	O16	H5	ND	-	-	-	-	DRR102895	BFTM01000000
JML228	2015	Japan	human	feces	commensal	B2	O75	H5	550	-	-	-	-	DRR102896	BFTN01000000
JML230	2015	Japan	human	feces	commensal	F	O36	H34	ND	-	-	-	-	DRR102897	BFTO01000000
JML231	2015	Japan	human	feces	commensal	A	UT	H23	ND	-	-	-	-	DRR102898	BFTP01000000
JML232	2015	Japan	human	feces	commensal	B2	UT	H5	ND	-	-	-	-	DRR102899	BFTQ01000000
JML233	2015	Japan	human	feces	commensal	B1	O185	H47	ND	-	-	-	-	DRR102900	BFTR01000000
JML234	2015	Japan	human	feces	commensal	C	O8	H19	ND	-	-	-	-	DRR102901	BFTS01000000
JML235	2015	Japan	human	feces	commensal	B2	O85	H31	803	-	-	zeta/zeta3	-	DRR102902	BFTT01000000
JML236	2015	Japan	human	feces	commensal	D	Onovel31	H4	69	-	-	-	-	DRR102903	BFTU01000000
JML237	2015	Japan	human	feces	commensal	B2	Onovel31	H4	131	-	-	-	-	DRR102904	BFTV01000000
JML238	2015	Japan	human	feces	commensal	B1	UT	H31	7906	-	-	-	-	DRR102905	BFTW01000000
JML240	2015	Japan	human	feces	commensal	B2	O4	H5	12?	-	-	-	-	DRR102906	BFTX01000000
JML241	2015	Japan	human	feces	commensal	A	O21	H10	5523	-	-	-	-	DRR102907	BFTY01000000
JML242	2015	Japan	human	feces	commensal	B2	O153var1	H5	131	-	-	-	-	DRR102908	BFTZ01000000
JML243	2015	Japan	human	feces	commensal	A	O173	H7	5493	-	-	-	-	DRR102909	BFUA01000000
JML248	2015	Japan	human	feces	commensal	B2	O1	H1	95	-	-	-	-	DRR102910	BFUB01000000
JML249	2015	Japan	human	feces	commensal	B2	Gp10	H4	ND	-	-	-	-	DRR102911	BFUC01000000
JML250	2015	Japan	human	feces	commensal	D	O153var1	H9	38*?	-	-	-	-	DRR102912	BFUD01000000
JML251	2015	Japan	human	feces	commensal	B2	Gp7	H6	141	-	-	-	-	DRR102913	BFUE01000000
JML254	2015	Japan	human	feces	commensal	B1	O170	H21	4979	-	-	-	-	DRR102914	BFUF01000000
JML255	2015	Japan	human	feces	commensal	B2	O75	H5	550	-	-	-	-	DRR102915	BFUG01000000
JML259	2015	Japan	human	feces	commensal	D	O1	H6	7901	-	-	-	-	DRR102916	BFUH01000000
JML261	2015	Japan	human	feces	commensal	B2	O1	H7	95*?	-	-	-	-	DRR102917	BFUI01000000
JML262	2015	Japan	human	feces	commensal	B2	O1	H1	95?	-	-	-	-	DRR102918	BFUJ01000000
JML263	2015	Japan	human	feces	commensal	F	O1	H45	ND	-	-	-	-	DRR102919	BFUK01000000
JML264	2015	Japan	human	feces	commensal	B2	Gp10	H4	ND	-	-	-	-	DRR102920	BFUL01000000
JML265	2015	Japan	human	feces	commensal	B2	Gp10	H4	357*?	-	-	-	-	DRR102921	BFUM01000000
JML266	2015	Japan	human	feces	commensal	B2	O1	H1	95?	-	-	-	-	DRR102922	BFUN01000000
JML267	2015	Japan	human	feces	commensal	F	O36	H42	7878	-	-	-	-	DRR102923	BFUO01000000
JML268	2015	Japan	human	feces	commensal	B2	UT	H5	7866	-	-	-	-	DRR102924	BFUP01000000
JML269	2015	Japan	human	feces	commensal	B2	Gp10	H4	357	-	-	-	-	DRR102925	BFUQ01000000
JML270	2015	Japan	human	feces	commensal	F	O1	H33	6630	-	-	-	-	DRR102926	BFUR01000000
JML271	2015	Japan	human	feces	commensal	A	UT	H4	93	-	-	-	-	DRR102927	BFUS01000000
JML273	2015	Japan	human	feces	commensal	B2	Gp10	H4	357	-	-	-	-	DRR102928	BFUT01000000
JML274	2015	Japan	human	feces	commensal	B2	Onovel31	H4	131?	-	-	-	-	DRR102929	BFUU01000000
JML275	2015	Japan	human	feces	commensal	B2	O16	H5	3878*?	-	-	-	-	DRR102930	BFUV01000000
JML276	2015	Japan	human	feces	commensal	B2	Gp10	H4	357?	-	-	-	-	DRR102931	BFUW01000000
JML277	2015	Japan	human	feces	commensal	A	O7	H4	ND	-	-	-	-	DRR102932	BFUX01000000
JML278	2015	Japan	human	feces	commensal	D	Gp9	H45	69	-	-	-	-	DRR102933	BFUY01000000
JML279	2015	Japan	human	feces	commensal	F	UT	H23	ND	-	-	-	-	DRR102934	BFUZ01000000
JML280	2015	Japan	human	feces	commensal	D	Gp9	H18	69	-	-	-	-	DRR102935	BFVA01000000
JML281	2015	Japan	human	feces	commensal	B2	O170	H14	7874	-	-	-	-	DRR102936	BFVB01000000
JML282	2015	Japan	human	feces	commensal	B2	Gp7	H7	95	-	-	-	-	DRR102937	BFVC01000000
JML283	2015	Japan	human	feces	commensal	A	O71	H12	5295	-	-	-	-	DRR102938	BFVD01000000
JML284	2015	Japan	human	feces	commensal	D	O1	H15	38*?	-	-	-	-	DRR102939	BFVE01000000
JML285	2015	Japan	human	feces	commensal	B1	Gp2	H8	109*	-	-	-	-	DRR102940	BFVF01000000
JML287	2015	Japan	human	feces	commensal	B2	Gp12	H7	95?	-	-	-	-	DRR102941	BFVG01000000
JML288	2015	Japan	human	feces	commensal	B2	O1	H7	95	-	-	-	-	DRR102942	BFVH01000000
JML290	2015	Japan	human	feces	commensal	B2	O1	H7	95?	-	-	-	-	DRR102943	BFVI01000000
JML291	2015	Japan	human	feces	commensal	B2	O1	H1	95?	-	-	-	-	DRR102944	BFVJ01000000
JML293	2015	Japan	human	feces	commensal	A	O174	H34	2014	-	-	-	-	DRR102946	BFVK01000000
JML294	2015	Japan	human	feces	commensal	B2	O1	H1	95	-	-	-	-	DRR102947	BFVL01000000
JML295	2015	Japan	human	feces	commensal	A	UT	H39	7903	-	-	-	-	DRR102948	BFVM01000000
JML296	2015	Japan	human	feces	commensal	B2	UT	H1	ND	-	-	-	-	DRR102949	BFVN01000000
JML297	2015	Japan	human	feces	commensal	B1	UT	H27	3570	-	-	-	-	DRR102950	BFVO01000000
JML298	2015	Japan	human	feces	commensal	B2	Gp12	H7	95?	-	-	-	-	DRR102951	BFVP01000000
JML299	2015	Japan	human	feces	commensal	B2	Gp10	H4	357	-	-	-	-	DRR102952	BFVQ01000000
JML300	2015	Japan	human	feces	commensal	B2	O16	H6	ND	-	-	-	-	DRR102953	BFVR01000000
CM1	2006	Japan	human	urine	ExPEC	B2	O1	H1	95	-	-	-	Urinary tract infection	DRR102567	BFGW01000000
CM12	2006	Japan	human	urine	ExPEC	B2	Gp12	H7	95	-	-	-	Urinary tract infection	DRR102561	BFGQ01000000
CM14	2006	Japan	human	urine	ExPEC	B2	Gp6	H7	2800	-	-	-	Urinary tract infection	DRR102562	BFGR01000000
CM15	2006	Japan	human	urine	ExPEC	B2	Gp7	H7	95	-	-	-	Urinary tract infection	DRR102563	BFGS01000000
CM16	2006	Japan	human	urine	ExPEC	B2	O22	H1	73	-	-	-	Urinary tract infection	DRR102564	BFGT01000000
CM17	2006	Japan	human	urine	ExPEC	B2	UT	H7	95	-	-	-	Urinary tract infection	DRR102565	BFGU01000000
CM18	2006	Japan	human	urine	ExPEC	B2	O4	H5	12	-	-	-	Urinary tract infection	DRR102566	BFGV01000000
CM20	2006	Japan	human	urine	ExPEC	D	UT	H18	69	-	-	-	Urinary tract infection	DRR102568	BFGX01000000
CM31	2006	Japan	human	urine	ExPEC	B2	Onovel31	H4	131	-	-	-	Urinary tract infection	DRR102569	BFGY01000000
CM32	2006	Japan	human	urine	ExPEC	B2	Gp12	H7	95	-	-	-	Urinary tract infection	DRR102570	BFGZ01000000
ECSC001	2006	Japan	human	blood	ExPEC	D	O102	H6	405	-	-	-	bacteremia	DRR102571	BFHA01000000
ECSC002	2006	Japan	human	blood	ExPEC	D	Gp9	H18	69	-	-	-	bacteremia	DRR102572	BFHB01000000
ECSC003	2007	Japan	human	blood	ExPEC	B2	O1	H1	95	-	-	-	bacteremia	DRR102573	BFHC01000000
ECSC004	2007	Japan	human	blood	ExPEC	B1	Onovel21	H7	2165	-	-	-	bacteremia	DRR102574	BFHD01000000
ECSC006	2008	Japan	human	blood	ExPEC	B2	O75	H5	550	-	-	-	bacteremia	DRR102576	BFHF01000000
ECSC007	2008	Japan	human	blood	ExPEC	B2	O6	H1	73	-	-	-	bacteremia	DRR102577	BFHG01000000
ECSC009	2006	Japan	human	blood	ExPEC	B2	Gp7	H7	95	-	-	-	bacteremia	DRR102578	BFHH01000000
ECSC010	2006	Japan	human	blood	ExPEC	B2	Gp12	H5	14	-	-	-	bacteremia	DRR102579	BFHI01000000
ECSC012	2007	Japan	human	blood	ExPEC	D	O1	H15	2003	-	-	-	bacteremia	DRR102580	BFHJ01000000
ECSC014	2007	Japan	human	blood	ExPEC	B1	O66	H45	101	-	-	-	bacteremia	DRR102581	BFHK01000000
ECSC016	2007	Japan	human	blood	ExPEC	D	O102	H6	405	-	-	-	bacteremia	DRR102582	BFHL01000000
ECSC017	2008	Japan	human	blood	ExPEC	B2	O131	H45	491	-	-	-	bacteremia	DRR102583	BFHM01000000
ECSC018	2008	Japan	human	blood	ExPEC	A	O45	H16	450	-	-	-	bacteremia	DRR102584	BFHN01000000
ECSC019	2008	Japan	human	blood	ExPEC	F	O1	H34	354	-	-	-	bacteremia	DRR102585	BFHO01000000
ECSC020	2007	Japan	human	blood	ExPEC	A	Onovel32	H9	167	-	-	-	bacteremia	DRR102586	BFHP01000000
ECSC021	2007	Japan	human	blood	ExPEC	B2	Onovel31	H4	131	-	-	-	bacteremia	DRR102587	BFHQ01000000
ECSC022	2008	Japan	human	blood	ExPEC	F	O1	H6	648	-	-	-	bacteremia	DRR102588	BFHR01000000
ECSC024	2008	Japan	human	blood	ExPEC	B2	O1	H7	95	-	-	-	bacteremia	DRR102590	BFHT01000000
ECSC025	2008	Japan	human	blood	ExPEC	F	Onovel31	H6	648	-	-	-	bacteremia	DRR102591	BFHU01000000
ECSC026	2008	Japan	human	blood	ExPEC	B2	Onovel31	H4	95	-	-	-	bacteremia	DRR102592	BFHV01000000
ECSC028	2008	Japan	human	blood	ExPEC	B2	O4	H5	5389	-	-	-	bacteremia	DRR102594	BFHX01000000
ECSC029	2008	Japan	human	blood	ExPEC	B2	Gp7	H7	95	-	-	-	bacteremia	DRR102595	BFHY01000000
ECSC030	2008	Japan	human	blood	ExPEC	C	O78	H12	7875	-	-	-	bacteremia	DRR102596	BFHZ01000000
ECSC031	2008	Japan	human	blood	ExPEC	B2	O16	H5	131	-	-	-	bacteremia	DRR102597	BFIA01000000
ECSC032	2008	Japan	human	blood	ExPEC	B2	O6	H1	73	-	-	-	bacteremia	DRR102598	BFIB01000000
ECSC033	2008	Japan	human	blood	ExPEC	B2	O6	H1	73	-	-	-	bacteremia	DRR102599	BFIC01000000
ECSC034	2008	Japan	human	blood	ExPEC	B2	Gp7	H4	95	-	-	-	bacteremia	DRR102600	BFID01000000
ECSC035	2008	Japan	human	blood	ExPEC	B2	Gp10	H4	357	-	-	-	bacteremia	DRR102601	BFIE01000000
ECSC036	2008	Japan	human	blood	ExPEC	D	O15	H18	69	-	-	-	bacteremia	DRR102602	BFIF01000000
ECSC037	2008	Japan	human	blood	ExPEC	B2	Gp7	H6	141	-	-	-	bacteremia	DRR102603	BFIG01000000
ECSC038	2002	Japan	human	blood	ExPEC	F	O153var1	H34	354	-	-	-	bacteremia	DRR102604	BFIH01000000
ECSC039	2002	Japan	human	blood	ExPEC	B2	O75	H5	1193	-	-	-	bacteremia	DRR102605	BFII01000000
ECSC041	2002	Japan	human	blood	ExPEC	B2	Gp7	H4	7896	-	-	-	bacteremia	DRR102606	BFIJ01000000
ECSC042	2003	Japan	human	blood	ExPEC	D	O15	H1	393	-	-	-	bacteremia	DRR102607	BFIK01000000
ECSC043	2003	Japan	human	blood	ExPEC	A	O142	H34	1415	-	-	-	bacteremia	DRR102608	BFIL01000000
ECSC044	2003	Japan	human	blood	ExPEC	C	O78	H9	23	-	-	-	bacteremia	DRR102609	BFIM01000000
ECSC045	2003	Japan	human	blood	ExPEC	B2	O1	H7	95	-	-	-	bacteremia	DRR102610	BFIN01000000
ECSC046	2003	Japan	human	blood	ExPEC	B2	Gp12	H7	95	-	-	-	bacteremia	DRR102611	BFIO01000000
ECSC048	2004	Japan	human	blood	ExPEC	D	Gp9	H18	69	-	-	-	bacteremia	DRR102612	BFIP01000000
ECSC049	2004	Japan	human	blood	ExPEC	D	O15	H1	393	-	-	-	bacteremia	DRR102613	BFIQ01000000
ECSC050	2004	Japan	human	blood	ExPEC	B1	O96	H19	7890	-	-	-	bacteremia	DRR102614	BFIR01000000
ECSC052	2004	Japan	human	blood	ExPEC	B2	Gp10	H4	357	-	-	-	bacteremia	DRR102615	BFIS01000000
ECSC053	2004	Japan	human	blood	ExPEC	B2	Gp10	H4	357	-	-	-	bacteremia	DRR102616	BFIT01000000
ECSC054	2004	Japan	human	blood	ExPEC	D	O4	H30	38	-	-	-	bacteremia	DRR102617	BFIU01000000
ECSC056	2005	Japan	human	blood	ExPEC	B1	O23	H16	453	-	-	-	bacteremia	DRR102618	BFIV01000000
ECSC057	2005	Japan	human	blood	ExPEC	B2	O25	H5	7882	-	-	-	bacteremia	DRR102619	BFIW01000000
ECSC058	2005	Japan	human	blood	ExPEC	B2	Gp12	H7	95	-	-	-	bacteremia	DRR102620	BFIX01000000
ECSC060	2006	Japan	human	blood	ExPEC	B1	O8	H8	448	-	-	-	bacteremia	DRR102621	BFIY01000000
ECSC061	2007	Japan	human	blood	ExPEC	B2	O22	H1	2572	-	-	-	bacteremia	DRR102622	BFIZ01000000
ECSC063	UN	Japan	human	blood	ExPEC	B2	O1	H1	95*	-	-	-	bacteremia	DRR102624	BFJB01000000
ECSC064	UN	Japan	human	blood	ExPEC	B2	O16	H5	131	-	-	-	bacteremia	DRR102625	BFJC01000000
ECSC065	2008	Japan	human	blood	ExPEC	B2	Onovel31	H4	131	-	-	-	bacteremia	DRR102626	BFJD01000000
ECSC066	2008	Japan	human	blood	ExPEC	D	O86	H18	7886	-	-	-	bacteremia	DRR102627	BFJE01000000
ECSC067	2008	Japan	human	blood	ExPEC	D	O15	H18	69	-	-	-	bacteremia	DRR102628	BFJF01000000
ECSC068	2008	Japan	human	blood	ExPEC	B2	O1	H1	95	-	-	-	bacteremia	DRR102629	BFJG01000000
ECSC069	2008	Japan	human	blood	ExPEC	B2	Onovel31	H4	131	-	-	-	bacteremia	DRR102630	BFJH01000000
ECSC070	2008	Japan	human	blood	ExPEC	B2	Onovel31	H4	131	-	-	-	bacteremia	DRR102631	BFJI01000000
ECSC071	2008	Japan	human	blood	ExPEC	A	O74	H23	939	-	-	-	bacteremia	DRR102632	BFJJ01000000
ECSC072	2008	Japan	human	blood	ExPEC	B2	Onovel31	H4	131	-	-	-	bacteremia	DRR102633	BFJK01000000
ECSC073	2008	Japan	human	blood	ExPEC	B2	O75	H5	1193	-	-	-	bacteremia	DRR102634	BFJL01000000
ECSC076	2008	Japan	human	blood	ExPEC	B2	O6	H1	2572	-	-	-	bacteremia	DRR102635	BFJM01000000
ECSC077	2008	Japan	human	blood	ExPEC	D	Gp9	H18	69	-	-	-	bacteremia	DRR102636	BFJN01000000
ECSC078	2008	Japan	human	blood	ExPEC	B2	O4	H5	961	-	-	-	bacteremia	DRR102637	BFJO01000000
UPEC04	2011	Japan	human	urine	ExPEC	B2	O25	H1	73	-	-	-	Urinary tract infection	DRR103311	BGJL01000000
UPEC06	2011	Japan	human	urine	ExPEC	B2	O1	H1	95	-	-	-	Urinary tract infection	DRR103312	BGJM01000000
UPEC119	2011	Japan	human	urine	ExPEC	B2	Onovel31	H4	131	-	-	-	Urinary tract infection	DRR103313	BGJN01000000
UPEC121	2011	Japan	human	urine	ExPEC	B2	O22	H1	73	-	-	-	Urinary tract infection	DRR103314	BGJO01000000
UPEC129	2011	Japan	human	urine	ExPEC	B2	Gp7	H7	95	-	-	-	Urinary tract infection	DRR103315	BGJP01000000
UPEC54	2011	Japan	human	urine	ExPEC	B2	O16	H5	131	-	-	-	Urinary tract infection	DRR103316	BGJQ01000000
UPEC57	2011	Japan	human	urine	ExPEC	B2	Gp7	H7	95	-	-	-	Urinary tract infection	DRR103317	BGJR01000000
UPEC61	2011	Japan	human	urine	ExPEC	B2	UT	H5	1193	-	-	-	Urinary tract infection	DRR103318	BGJS01000000
UPEC79	2011	Japan	human	urine	ExPEC	B2	O6	H1	73	-	-	-	Urinary tract infection	DRR103319	BGJT01000000
UPEC87	2011	Japan	human	urine	ExPEC	D	UT	H18	38	-	-	-	Urinary tract infection	DRR103320	BGJU01000000
UPEC91	2011	Japan	human	urine	ExPEC	B2	O1	H7	95	-	-	-	Urinary tract infection	DRR103321	BGJV01000000
UPEC96	2011	Japan	human	urine	ExPEC	C	O8	H10	88	-	-	-	Urinary tract infection	DRR103322	BGJW01000000
UT: untypeable
NA: not available
ND: not determined
*: the best scoring allele has >=1 mismatch
?: uncertainty in the result because the best scoring allele has some low-depth bases

## Sheet: Supple Table S2
Supplemental table S2. E. coli sequence data obtained from public database
Strain name	Year of Isolation	Country	Host	Source	Pathotype	Phylogroup	O serogroup	H serogroup	ST	stx1 (subtype)	stx2 (subtype)	LEE (subtype)	Symptom	Accession no.
11128	2001	Japan	human	feces	STEC	B1	O111	H8	16	+ (ND)	+ (ND)	+ (theta)	Diarrhoea	AP010960
12009	2001	Japan	human	feces	STEC	B1	O103	H2	17	+ (ND)	+ (ND)	+ (epsilon1)	Bloody diarrhoea	AP010958
100290	UN	The Gambia	human	feces	EPEC	B2	Gp4	H6	1283	-	-	+ (alpha1)	Lethal symptomatic diarrhoeal illness	JHQV00000000
100329	UN	The Gambia	human	feces	EPEC	A	UT	H33	34	-	-	+ (UT)	Non-lethal symptomatic diarrhoeal illness	JHRT00000000
100414	UN	The Gambia	human	feces	EPEC	B2	O33	H6	121*	-	-	+ (beta2)	Lethal symptomatic diarrhoeal illness	JHQX00000000
100854	UN	The Gambia	human	feces	EPEC	A	O70	H40	ND	-	-	+ (theta)	Non-lethal symptomatic diarrhoeal illness	JHRU00000000
102550	UN	The Gambia	human	feces	EPEC	B1	O2var1	UT	ND	-	-	+ (epsilon1)	Lethal symptomatic diarrhoeal illness	JHQY00000000
102929	UN	The Gambia	human	feces	EPEC	B1	O177	H9	381	-	-	+ (zeta)	Non-lethal symptomatic diarrhoeal illness	JHRX00000000
103385	UN	The Gambia	human	feces	EPEC	B2	O55	H51	ND	-	-	+ (mu)	Lethal symptomatic diarrhoeal illness	JHQZ00000000
103573	UN	The Gambia	human	feces	EPEC	B1	UT	H7	328	-	-	+ (beta1)	Lethal symptomatic diarrhoeal illness	JHRA00000000
200146	UN	Mali	human	feces	EPEC	B1	O88	H25	328	-	-	+ (beta1)	Non-lethal symptomatic diarrhoeal illness	JHRZ00000000
203741	UN	Mali	human	feces	EPEC	B2	UT	H6	28	-	-	+ (UT)	Lethal symptomatic diarrhoeal illness	JHRB00000000
302014	UN	Mozambique	human	feces	EPEC	B1	O111	H2	3	-	-	+ (beta1)	Lethal symptomatic diarrhoeal illness	JHRE00000000
302053	UN	Mozambique	human	feces	EPEC	B2	O33	H34	2346	-	-	+ (lambda)	Lethal symptomatic diarrhoeal illness	JHRG00000000
302150	UN	Mozambique	human	feces	EPEC	B2	UT	H6	28	-	-	+ (beta2)	Non-lethal symptomatic diarrhoeal illness	JHSD00000000
302662	UN	Mozambique	human	feces	EPEC	B1	UT	H7	ND	-	-	+ (beta1)	Lethal symptomatic diarrhoeal illness	JHRI00000000
302687	UN	Mozambique	human	feces	EPEC	B1	UT	H7	ND	-	-	+ (UT)	Non-lethal symptomatic diarrhoeal illness	JHSE00000000
302909	UN	Mozambique	human	feces	EPEC	B2	UT	H1	3053	-	-	+ (UT)	Non-lethal symptomatic diarrhoeal illness	JHSF00000000
303289	UN	Mozambique	human	feces	EPEC	B2	UT	H6	1283*	-	-	+ (alpha1)	Lethal symptomatic diarrhoeal illness	JHRJ00000000
400738	UN	Kenya	human	feces	EPEC	B2	O119	H6	28	-	-	+ (beta2)	Non-lethal symptomatic diarrhoeal illness	JHSH00000000
401031	UN	Kenya	human	feces	EPEC	B2	O142	H6	15	-	-	+ (alpha1)	Lethal symptomatic diarrhoeal illness	JHRL00000000
401091	UN	Kenya	human	feces	EPEC	B1	UT	H7	ND	-	-	+ (beta1)	Non-lethal symptomatic diarrhoeal illness	JHSI00000000
401140	UN	Kenya	human	feces	EPEC	A	O111	H27	1788	-	-	+ (epsilon1)	Lethal symptomatic diarrhoeal illness	JHRM00000000
401150	UN	Kenya	human	feces	EPEC	B1	UT	H7	ND	-	-	+ (beta1)	Lethal symptomatic diarrhoeal illness	JHRN00000000
401210	UN	Kenya	human	feces	EPEC	UT	UT	H27	1788	-	-	+ (UT)	Non-lethal symptomatic diarrhoeal illness	JHSJ00000000
401954	UN	Kenya	human	feces	EPEC	B1	O114	H2	3	-	-	+ (beta1)	Lethal symptomatic diarrhoeal illness	JHRP00000000
402290	UN	Kenya	human	feces	EPEC	B1	UT	H7	ND	-	-	+ (beta1)	Lethal symptomatic diarrhoeal illness	JHRQ00000000
702324	UN	Pakistan	human	feces	EPEC	B2	O142	H34	2346	-	-	+ (alpha1)	Lethal symptomatic diarrhoeal illness	JHRR00000000
702423	UN	Pakistan	human	feces	EPEC	B1	O126	H2	6292	-	-	+ (beta1)	Non-lethal symptomatic diarrhoeal illness	JHSO00000000
703533	UN	Pakistan	human	feces	EPEC	B1	UT	H2	3	-	-	+ (UT)	Lethal symptomatic diarrhoeal illness	JHRS00000000
111-1495	UN	USA	human	urine	ExPEC	B1	UT	H14	1610	-	-	-	Urinary tract infection	NZ_LEOM01000000
176-2352	UN	USA	human	urine	ExPEC	B2	O131	H45	491	-	-	-	Urinary tract infection	NZ_LEOH01000000
228-2998	UN	USA	human	urine	ExPEC	B2	Gp12	H7	95	-	-	-	Urinary tract infection	NZ_LEMT01000000
25-541	UN	USA	human	urine	ExPEC	B2	Onovel31	H4	131	-	-	-	Urinary tract infection	NZ_LENK01000000
53-1034	UN	USA	human	urine	ExPEC	B1	Onovel13	H28	2351	-	-	-	Urinary tract infection	NZ_LEME01000000
6-171	UN	USA	human	urine	ExPEC	B2	UT	H5	126	-	-	-	Urinary tract infection	NZ_LENF01000000
67-1294	UN	USA	human	urine	ExPEC	B1	O109	H40	101	-	-	-	Urinary tract infection	NZ_LEMK01000000
73-938	UN	USA	human	urine	ExPEC	D	Gp9	H18	69	-	-	-	Urinary tract infection	NZ_LEOK00000000
76-1333	UN	USA	human	urine	ExPEC	B1	O8_wzm/wzt_Gp6_wzx/wzy	H21_fliC_H53_flkA	345	-	-	-	Urinary tract infection	NZ_LEMN01000000
92-1476	UN	USA	human	urine	ExPEC	B2	Gp12	H31	372	-	-	-	Urinary tract infection	NZ_LENV01000000
94-3024	1994	USA	human	feces	STEC	B1	O104	H21	672	-	+ (ND)	-	Montana milk outbreak	NZ_CP009106
97-3250	1997	USA	human	feces	STEC	B1	O26	H11	21	+ (ND)	+ (ND)	+ (beta1)	HUS	NZ_JHEW00000000
CL-3	1980	Canada	human	feces	STEC	B1	O113	H21	223	-	+ (ND)	-	HUS	AGTH01000000
ECBSI11-SJH	UN	Ireland	human	blood	ExPEC	C	O8	H9	88	-	-	-	Bacteremia	ERS795450
ECBSI12-SJH	UN	Ireland	human	blood	ExPEC	D	O15	H1	393	-	-	-	Bacteremia	ERS795451
ECBSI14-SJH	UN	Ireland	human	blood	ExPEC	F	O7	H45	62	-	-	-	Bacteremia	ERS795453
ECBSI16-SJH	UN	Ireland	human	blood	ExPEC	E	Gp9	H34	130	-	-	-	Bacteremia	ERS795455
ECBSI17-SJH	UN	Ireland	human	blood	ExPEC	B2	O16	H5	131	-	-	-	Bacteremia	ERS795456
ECBSI18-SJH	UN	Ireland	human	blood	ExPEC	B2	O6	H31	127	-	-	-	Bacteremia	ERS795457
ECBSI20-SJH	UN	Ireland	human	blood	ExPEC	B2	O6	H1	73	-	-	-	Bacteremia	ERS795463
ECBSI6-SJH	UN	Ireland	human	blood	ExPEC	D	O102	H6	405	-	-	-	Bacteremia	ERS795465
ECBSI7-SJH	UN	Ireland	human	blood	ExPEC	D	Gp7	H4	405	-	-	-	Bacteremia	ERS795466
ECBSI8-SJH	UN	Ireland	human	blood	ExPEC	B1	O23	H16	453	-	-	-	Bacteremia	ERS795467
FHI101	UN	Norway	human	feces	STEC	A	O80	H2	301	-	+ (ND)	+ (xi)	Gastroenteritis	ERS480224
FHI12	UN	Norway	human	feces	STEC	B1	O103	H25	343	-	+ (ND)	+ (theta)	HUS	ERS480143
FHI23	UN	Norway	human	feces	STEC	B2	O76	H1	2808	+ (ND)	-	-	Gastroenteritis	ERS480153
FHI25	UN	Norway	human	feces	STEC	A	O145	H25	342	-	+ (ND)	+ (beta1)	HUS	ERS480155
FHI28	UN	Norway	human	feces	STEC	B1	O8_wzm/wzt_O40_wzx/wzy	H19	4267	-	+ (ND)	-	Gastroenteritis	ERS480157
FHI29	UN	Norway	human	feces	STEC	A	Gp3	H12	10	+ (ND)	-	-	Gastroenteritis	ERS480158
FHI34	UN	Norway	human	feces	STEC	B1	O104	H7	1817	+ (ND)	-	-	Bloody diarrhoea	ERS480162
FHI40	UN	Norway	human	feces	STEC	E	O154	H31	1892	+ (ND)	-	-	Gastroenteritis	ERS480168
FHI45	UN	Norway	human	feces	STEC	B1	O168	H8	718	+ (ND)	-	-	Gastroenteritis	ERS480172
FHI54	UN	Norway	human	feces	STEC	UT	O166	H28	1819	+ (ND)	-	-	Gastroenteritis	ERS480181
FHI64	UN	Norway	human	feces	STEC	B1	O182	H25	300	+ (ND)	-	+ (zeta/zeta3)	Bloody diarrhoea	ERS480189
FHI72	UN	Norway	human	feces	STEC	B2	Gp8	H7	504	+ (ND)	-	-	Bloody diarrhoea	ERS480197
FHI8	UN	Norway	human	feces	STEC	B1	O70	H11	29	-	+ (ND)	+ (beta1)	HUS	ERS480140
FHI81	2010	Norway	human	feces	STEC	B1	O91	H14	33	+ (ND)	+ (ND)	-	Gastroenteritis	ERS480205
FHI83	UN	Norway	human	feces	STEC	B1	O121	H19	655	-	+ (ND)	+ (epsilon1)	HUS	ERS480207
FHI86	UN	Norway	human	feces	STEC	C	O8	H9	23	-	+ (ND)	-	Gastroenteritis	ERS480210
FHI88	UN	Norway	human	feces	STEC	B1	O111	H21	40	-	+ (ND)	-	Bloody diarrhoea	ERS480212
FHI89	UN	Norway	human	feces	STEC	B1	UT	H11	295	-	+ (ND)	-	Gastroenteritis	ERS480213
FHI98	UN	Norway	human	feces	STEC	B1	O2var1	H29	515	-	+ (ND)	-	Gastroenteritis	ERS480221
FHI99	UN	Norway	human	feces	STEC	A	Gp7	H48	10	-	+ (ND)	-	Gastroenteritis	ERS480222
IH53473	1997	Finland	human	feces	STEC	A	Gp15	H33	330	-	+ (ND)	+ (iota2)	HUS	LFZH00000000
IH57218	2001	Finland	human	feces	STEC	A	Gp7	H27	10	-	+ (ND)	-	Diarrhoea	LFZJ00000000
RM13514	2010	USA	human	feces	STEC	D	O145	H28	32	-	+ (ND)	+ (gamma1)	Lettuce-associated outbreak	CP006027
sakai	1996	Japan	human	feces	STEC	E	O157	H7	11	+ (ND)	+ (ND)	+ (gamma1)	Sakai outbreak	BA000007
St. Olav39	2004	Norway	human	feces	STEC	B1	Gp5	H2	17	+ (ND)	+ (ND)	+ (epsilon1)	Gastroenteritis	JZDU00000000
STEC 1161	2013	Netherlands	human	feces	STEC	B1	O84	H2	6042	+ (ND)	-	+ (zeta/zeta3)	Diarrhoea	LOFV00000000
STEC 1255	2013	Netherlands	human	feces	STEC	A	O5	H9	342	+ (ND)	+ (ND)	+ (beta1)	Bloody diarrhoea	LOGC00000000
STEC 1375	2013	Netherlands	human	feces	STEC	B1	O185	H7	2387	-	+ (ND)	-	Diarrhoea	LOGJ00000000
STEC 1473	2014	Netherlands	human	feces	STEC	B2	O113	H6	121	-	+ (ND)	+ (beta2)	Diarrhoea	LOGM00000000
STEC 1506	2014	Netherlands	human	feces	STEC	B1	O5	H19	447	+ (ND)	+ (ND)	-	Abdominal pain	LPWV00000000
STEC 1528	2014	Netherlands	human	feces	STEC	B2	O75	H7	80	-	+ (ND)	-	Diarrhoea	LOGP00000000
STEC 1634	2014	Netherlands	human	feces	STEC	B1	O8	H8	26	-	+ (ND)	-	Diarrhoea	LOGS00000000
STEC 2211	2013	Netherlands	human	feces	STEC	B1	O108	H25	300	+ (ND)	-	+ (zeta/zeta3)	Bloody diarrhoea	LOGX00000000
STEC 2236	2013	Netherlands	human	feces	STEC	A	O113	H4	10	-	+ (ND)	-	Diarrhoea	LOGY00000000
STEC 2359	2013	Netherlands	human	feces	STEC	B1	O55	H12	101	+ (ND)	-	-	Diarrhoea	LOHB00000000
STEC 2450	2013	Netherlands	human	feces	STEC	B1	O146	H21	442	+ (ND)	+ (ND)	-	Diarrhoea	LPXA00000000
STEC 2499	2013	Netherlands	human	feces	STEC	B1	O181	H49	6043	+ (ND)	+ (ND)	-	Abdominal pain	LOIE00000000
STEC 2573	2013	Netherlands	human	feces	STEC	B1	O112	H19	201	+ (ND)	+ (ND)	-	Bloody diarrhoea	LOIH00000000
STEC 2591	2013	Netherlands	human	feces	STEC	B1	O174	H2	661	+ (ND)	+ (ND)	-	Diarrhoea	LOII00000000
STEC 2595	2013	Netherlands	human	feces	STEC	D	Gp9	H18	69	-	+ (ND)	-	Diarrhoea	LOIJ00000000
STEC 2708	2013	Netherlands	human	feces	STEC	UT	O110	H9	10	+ (ND)	-	-	Diarrhoea	LOIL00000000
STEC 2826	2013	Netherlands	human	feces	STEC	B1	O91	H21	442	-	+ (ND)	-	Diarrhoea	LOJA00000000
STEC 2841	2013	Netherlands	human	feces	STEC	E	UT	H20	6060	+ (ND)	-	-	Diarrhoea	LOIQ00000000
STEC 2894.1	2013	Netherlands	human	feces	STEC	E	Onovel3	H20	6041	+ (ND)	-	-	Diarrhoea	LOIS00000000
STEC 2894.2	2013	Netherlands	human	feces	STEC	A	O177	H25	659	-	+ (ND)	+ (beta1)	Diarrhoea	LOIT00000000
STEC 2954	2013	Netherlands	human	feces	STEC	B1	O174	H8	13	+ (ND)	+ (ND)	-	Diarrhoea	LPXE00000000
STEC 3031	2014	Netherlands	human	feces	STEC	A	O38	H26	548	+ (ND)	+ (ND)	-	Bloody diarrhoea	LOIZ00000000
STEC 309	2013	Netherlands	human	feces	STEC	B1	O128	H2	20	-	+ (ND)	+ (beta1)	Abdominal pain	LOCS00000000
STEC 338	2013	Netherlands	human	feces	STEC	B1	O104	H4	678	-	+ (ND)	-	HUS	JRJF00000000
STEC 545	2013	Netherlands	human	feces	STEC	A	Onovel32	H9	10	-	+ (ND)	-	Diarrhoea	LODB00000000
STEC 66	2013	Netherlands	human	feces	STEC	A	O165	H25	119	+ (ND)	+ (ND)	+ (epsilon1)	Diarrhoea	LNFT00000000
STEC 690	2013	Netherlands	human	feces	STEC	B1	O69	H11	21	+ (ND)	-	+ (beta1)	Diarrhoea	LOFJ00000000
STEC 793	2013	Netherlands	human	feces	STEC	B2	O63	H6	6044	-	+ (ND)	+ (alpha2)	Bloody diarrhoea	LOFQ00000000
UPEC_001	2008	Poland	human	urine	ExPEC	B2	O4	H5	12	-	-	-	Urinary tract infection	NZ_JSVR00000000
UPEC_003	2008	Poland	human	urine	ExPEC	UT	O1	H7	59	-	-	-	Urinary tract infection	NZ_JSVP00000000
UPEC_004	2008	Poland	human	urine	ExPEC	F	O1	H6	648	-	-	-	Urinary tract infection	NZ_JSVO00000000
UPEC_005	2008	Poland	human	urine	ExPEC	B2	Gp7	H1	135	-	-	-	Urinary tract infection	NZ_JSVM00000000
UPEC_007	2008	Poland	human	urine	ExPEC	B1	O146	H21	442	-	-	-	Urinary tract infection	NZ_JSVL00000000
UPEC_014	2009	Poland	human	urine	ExPEC	A	UT	H30	361	-	-	-	Urinary tract infection	NZ_JSVQ00000000
BG1	2009	France	bovine	intestine	commensal	B1	O159	H21	10	-	-	-	-	NZ_MOAH00000000
Ec47VL	2014	Brazil	bovine	feces	commensal	C	O8	H9	95	-	-	-	-	LYPE00000000
FSIS11704423	2017	USA	bovine	feces	commensal	B1	Gp15	H7	34	-	-	-	-	SRS2558742
FSIS11704433	2017	USA	bovine	feces	commensal	B1	O9	H25	6658	-	-	-	-	SRS2558745
FSIS1700393	2017	USA	bovine	feces	commensal	B1	Gp13	H21	10	-	-	-	-	SRS2122156
FSIS1700394	2017	USA	bovine	feces	commensal	A	O108	H40	1193	-	-	+ (epsilon1)	-	SRS2121973
FSIS1701854	2017	USA	bovine	feces	commensal	B1	O8_wzm/wzt_O40_wzx/wzy	H16	48	-	-	-	-	SRS2284377
FSIS1702629	2017	USA	bovine	feces	commensal	B1	O54	H38	14	-	-	-	-	SRS2402065
FSIS1703525	2017	USA	bovine	feces	commensal	B1	O10	H42	131	-	-	-	-	SRS2449882
FSIS1703529	2017	USA	bovine	feces	commensal	B1	O153var2	H21	69?	-	-	-	-	SRS2449883
FSIS1703756	2017	USA	bovine	feces	commensal	B1	O3	H9	131	-	-	-	-	SRS2451743
FSIS1703759	2017	USA	bovine	feces	commensal	B1	O91	H10	362	-	-	-	-	SRS2451761
FSIS1703761	2017	USA	bovine	feces	commensal	B1	O142	H38	6655	-	-	-	-	SRS2451764
FSIS1703762	2017	USA	bovine	feces	commensal	B1	O150	H8	73	-	-	-	-	SRS2451749
K71	2003	Israel	bovine	feces	commensal	B1	O58	H40	73	-	-	-	-	NZ_JTFF00000000
MOD1-EC6565	1990	Canada	bovine	feces	commensal	B1	UT	H21	69	-	+ (stx2a, stxc/d)	-	-	SRS1588521
MOD1-EC6566	1990	Canada	bovine	feces	commensal	A	UT	H27	95	-	-	-	-	SRS1592650
MOD1-EC6568	1990	Canada	bovine	feces	commensal	A	O109	H16	48	-	+ (stx2g)	-	-	SRS1592651
MOD1-EC6569	1990	Canada	bovine	feces	commensal	B1	O113	H21	ND	-	+ (stx2a)	-	-	SRS1592648
MOD1-EC6572	1990	Canada	bovine	feces	commensal	B1	UT	H21	10	-	+ (stx2a)	-	-	SRS1588619
MOD1-EC6573	1990	Canada	bovine	feces	commensal	A	O32	H16	69	-	-	-	-	SRS1592652
MOD1-EC6574	1990	Canada	bovine	feces	commensal	B1	O22	H8	1136	-	-	-	-	SRS1592653
MOD1-EC6576	1990	Canada	bovine	feces	commensal	A	O74	H39	1136	-	-	-	-	SRS1592654
MOD1-EC6577	1990	Canada	bovine	feces	commensal	A	O74	H39	73	-	-	-	-	SRS1588620
MOD1-EC6669	1991	USA	bovine	feces	commensal	D	O11	H15	10	-	-	-	-	SRS1592708
MOD1-EC6679	1992	USA	bovine	feces	commensal	A	O66	H25	117	-	-	-	-	SRS1592717
MOD1-EC6680	1992	USA	bovine	feces	commensal	D	O166	H15	3770	-	-	-	-	SRS1592719
MOD1-EC6683	1992	USA	bovine	feces	commensal	A	O27	H12	117	-	-	-	-	SRS1592721
MOD1-EC6684	1992	USA	bovine	feces	commensal	A	O126	H45	10	-	-	-	-	SRS1592722
MOD1-EC6706	1993	USA	bovine	feces	commensal	B1	Gp15	H7	95	-	-	-	-	SRS1592742
MOD1-EC6709	1993	USA	bovine	feces	commensal	B1	O35	H16	10	-	-	-	-	SRS1592745
MOD1-EC6710	1993	USA	bovine	feces	commensal	A	O145	H25	1485	-	-	+ (beta1)	-	SRS1592746
MOD1-EC6782	1994	USA	bovine	feces	commensal	A	O153var1	H45	549	-	-	-	-	SRS1590064
MOD1-EC6789	1994	USA	bovine	feces	commensal	A	O148	H40	93*	-	-	-	-	SRS1590067
MOD1-EC6793	1994	USA	bovine	feces	commensal	B1	O98	H8	746?	-	-	+ (iota1)	-	SRS1590069
MOD1-EC6799	1995	USA	bovine	feces	commensal	C	O8	H4	405	-	-	-	-	SRS1590074
MOD1-EC6800	1995	USA	bovine	feces	commensal	B1	O113	H21	95	-	-	-	-	SRS1590075
MOD1-EC6802	1995	USA	bovine	feces	commensal	A	O160	H12	538	-	-	-	-	SRS1590076
MOD1-EC6803	1995	USA	bovine	feces	commensal	B1	O182	H25	1136	+ (stx1a)	-	+ (zeta/zeta3)	-	SRS1590077
MOD1-EC6804	1995	USA	bovine	feces	commensal	A	O15	H40	227	-	-	-	-	SRS1590078
MOD1-EC6805	1995	USA	bovine	feces	commensal	A	O49	H10	34	-	-	+ (iota1)	-	SRS1588612
MOD1-EC6806	1995	USA	bovine	feces	commensal	D	Gp9	H18	405	-	-	-	-	SRS1590079
MOD1-EC6807	1995	USA	bovine	feces	commensal	B1	O8_wzm/wzt_Gp6_wzx/wzy	H21_filC_H47_flkA	69	-	-	-	-	SRS1590080
MOD1-EC6809	1995	USA	bovine	feces	commensal	B1	O70	H11	405	-	-	+ (beta1)	-	SRS1589735
MOD1-EC6810	1995	USA	bovine	feces	commensal	B1	O105	H7	69	-	-	-	-	SRS1554255
RiKo2299/09	2009	Germany	bovine	feces	commensal	B1	O8_wzm/wzt_160_wzx/wzy	H8	69	-	-	-	-	JYKB00000000
RiKo2305/09	2009	Germany	bovine	feces	commensal	C	O8	H21	6656	-	-	-	-	JYPB00000000
RiKo2308/09	2009	Germany	bovine	feces	commensal	A	Onovel32	H9	130	-	-	-	-	LCVI00000000
RiKo2331/09	2009	Germany	bovine	feces	commensal	A	UT	H23	648	-	-	-	-	LCVJ00000000
RiKo2340/09	2009	Germany	bovine	feces	commensal	A	Onovel32	H9	457	-	-	-	-	LAGW00000000
RiKo2351/09	2009	Germany	bovine	feces	commensal	C	O21	H4	ND	-	-	-	-	LAUC00000000
W26	UN	South Koria	bovine	feces	commensal	B1	O45	H14	ND	-	-	-	-	AGIA00000000
1-R1	2008	Australia	human	feses	commensal	A	UT	H4	ND	-	-	-	-	MOYZ00000000
1.10-R8	2012	Australia	human	feses	commensal	B2	O1	H7	ND	-	-	-	-	MOZZ00000000
1.2-R2	2008	Australia	human	feses	commensal	A	Gp14	H30	ND	-	-	-	-	MOZE00000000
1.2-R3	2008	Australia	human	feses	commensal	A	O1	H11	ND	-	-	-	-	MOZI00000000
1.4-R4	2008	Australia	human	feses	commensal	A	UT	H4	ND	-	-	-	-	MOZS00000000
1.9-R6	2009	Australia	human	feses	commensal	B2	O75	H5	ND	-	-	-	-	MOYP00000000
1.9-R7	2009	Australia	human	feses	commensal	A	O64	H11	ND	-	-	-	-	MOZH00000000
10.1-R1	2008	Australia	human	feses	commensal	B2	O75	H5	ND	-	-	-	-	MOYQ00000000
11.1-R1	2009	Australia	human	feses	commensal	B2	Onovel31	H4	316	-	-	-	-	MOYT00000000
11.2-R2	2009	Australia	human	feses	commensal	D	Gp9	H18	58	-	-	-	-	MQAF00000000
11.3-R3	2010	Australia	human	feses	commensal	B2	Onovel31	H4	58	-	-	-	-	MOZN00000000
11.4-R4	2011	Australia	human	feses	commensal	D	O15	H1	752	-	-	-	-	MOZJ00000000
13.1-R1	2009	Australia	human	feses	commensal	D	O15	H18	336	-	-	-	-	MOZB00000000
13.1-R2	2009	Australia	human	feses	commensal	B2	O6	H1	154	-	-	-	-	MOYS00000000
13.1-R2a	2008	Australia	human	feses	commensal	B2	O6	H1	164	-	-	-	-	MOZV00000000
14.1-R1	2009	Australia	human	feses	commensal	D	Gp9	H18	58	-	-	-	-	MOZA00000000
14.2-R2	2009	Australia	human	feses	commensal	B2	O1	H7	278	-	-	-	-	MPAE00000000
14.2-R3	2009	Australia	human	feses	commensal	A	O176	H11	641	-	-	-	-	MOZW00000000
14.3-R4	2010	Australia	human	feses	commensal	A	O131	H10	154	-	-	-	-	MQAH00000000
15.1-R1	2009	Australia	human	feses	commensal	A	O132	H2	906	-	-	-	-	MOZP00000000
18.1-R1	2009	Australia	human	feses	commensal	D	Onovel31	H4	ND	-	-	-	-	MDZI00000000
19.1-R1	2009	Australia	human	feses	commensal	B1	O59	H19	648	-	-	-	-	MOYR00000000
19.1-R1a	2009	Australia	human	feses	commensal	B1	O59	H19	44	-	-	-	-	MOZQ00000000
19.1-R3	2009	Australia	human	feses	commensal	B2	Gp7	H1	405	-	-	-	-	MOZD00000000
2.2-R2	2008	Australia	human	feses	commensal	A	Gp7	H48	423	-	-	-	-	MPAG00000000
2.3-R3	2009	Australia	human	feses	commensal	F	O111	H4	405	-	-	-	-	MOZL00000000
2.3-R4	2009	Australia	human	feses	commensal	A	O5	H10	1286	-	-	-	-	MPAF00000000
2.3-R5	2009	Australia	human	feses	commensal	F	O111	H4	205	-	-	-	-	MPAC00000000
21.1-R1	2010	Australia	human	feses	commensal	A	O16	H4	871	-	-	-	-	MOZR00000000
22.1-R1	2010	Australia	human	feses	commensal	B2	Onovel31	H4	46	-	-	-	-	MOZT00000000
24-R3	2013	Australia	human	feses	commensal	A	O132	H2	4012	-	-	-	-	MOYW00000000
24.1-R1	2012	Australia	human	feses	commensal	F	O83	H42	93	-	-	-	-	MOYU00000000
24.1-R2	2012	Australia	human	feses	commensal	D	Gp9	H1	398	-	-	-	-	MOYV00000000
24.16-R4	2013	Australia	human	feses	commensal	A	O7	H4	3889	-	-	-	-	MQAE00000000
24.20-R5	2014	Australia	human	feses	commensal	A	UT	H18	449	-	-	-	-	MQAG00000000
3-R1	2008	Australia	human	feses	commensal	D	O102	H6	542	-	-	-	-	MPAA00000000
3-S1R	2008	Australia	human	feses	commensal	B2	O1	H7	394	-	-	-	-	MPAB00000000
3.3-R2	2009	Australia	human	feses	commensal	B2	Gp10	H4	5247	-	-	-	-	MOZC00000000
3.5-R3	2009	Australia	human	feses	commensal	B1	O59	H19	3489	-	-	-	-	MOZF00000000
3.6-R4	2010	Australia	human	feses	commensal	A	O99	H10	5236	-	-	-	-	MOZU00000000
3.6-R5	2010	Australia	human	feses	commensal	A	O99	H10	939	-	-	-	-	MPAD00000000
4-R1	2008	Australia	human	feses	commensal	D	O102	H6	10	-	-	-	-	MOZG00000000
4-R2	2008	Australia	human	feses	commensal	D	Gp9	H18	354	-	-	-	-	MPAH00000000
4.2-R3	2008	Australia	human	feses	commensal	D	O102	H6	5420	-	-	-	-	MPAI00000000
4.3-R2a	2009	Australia	human	feses	commensal	D	Gp9	H18	196	-	-	-	-	MOZK00000000
4.4-R2b	2009	Australia	human	feses	commensal	D	Gp9	H18	ND	-	-	-	-	MOYY00000000
5.1-R1	2008	Australia	human	feses	commensal	B2	O83	H1	223	-	-	-	-	MOYX00000000
5.2-R2	2008	Australia	human	feses	commensal	E	O176	H34	10	-	-	-	-	MOZM00000000
6.2-R1	2008	Australia	human	feses	commensal	F	O154	H10	329	-	-	-	-	MOZX00000000
9.1-R1	2008	Australia	human	feses	commensal	F	O11	H45	223	-	-	-	-	MOZY00000000
CS01	2013	USA	human	feces	commensal	A	UT	H30	223	-	-	-	-	JNOE00000000
CS02	2013	USA	human	feces	commensal	A	O15	H6	10	-	-	-	-	JNOF00000000
CS03	2013	USA	human	feces	commensal	B1	O8	H49	446	-	-	-	-	JNOG00000000
CS05	2013	USA	human	feces	commensal	B2	O16	H5	10	-	-	-	-	JNOI00000000
CS06	2013	USA	human	feces	commensal	D	O102	H6	10	-	-	-	-	JNOJ00000000
ED1a	2000	France	human	feces	commensal	B2	O81	H27	973	-	-	-	-	CU928162.2
Fec101	2000	Germany	human	feces	commensal	B1	O182	H16	2325	-	-	-	-	MDYZ00000000
Fec67	2000	Germany	human	feces	commensal	B2	Gp7	H6	349	-	-	-	-	MDRZ00000000
IHD1178_10	2012	Cambodia	human	feces	commensal	F	O1	H6	10	-	-	-	-	SRR1788125
IHD1178_14	2012	Cambodia	human	feces	commensal	A	Onovel32	H4	1302	-	-	-	-	SRR1788129
IHD1178_16	2012	Cambodia	human	feces	commensal	D	O102	H6	316	-	-	-	-	SRR1788131
IHD232_14	2012	Cambodia	human	feces	commensal	C	O8	H9	6594	-	-	-	-	SRR1788049
IHD232_15	2012	Cambodia	human	feces	commensal	D	O102	H6	342	-	-	-	-	SRR1788050
IHD232_9	2012	Cambodia	human	feces	commensal	A	O10	H32	2332	-	-	-	-	SRR1788044
IHD244_13	2012	Cambodia	human	feces	commensal	B1	O100	H12	541	-	-	-	-	SRR1788064
IHD244_9	2012	Cambodia	human	feces	commensal	A	O9	H19	6575	-	-	-	-	SRR1788060
IHD357_13	2012	Cambodia	human	feces	commensal	A	O9	H4	88	-	-	-	-	SRR1788080
IHD357_9	2012	Cambodia	human	feces	commensal	A	O8	H4	56	-	-	-	-	SRR1788076
IHD45_10	2012	Cambodia	human	feces	commensal	A	O7	H4	10	-	-	-	-	SRR1788014
IHD45_12	2012	Cambodia	human	feces	commensal	A	O8_wzm/wzt_0179_wzx/wzy	H4	300	-	-	-	-	SRR1788016
IHD45_13	2012	Cambodia	human	feces	commensal	A	Gp10	H2	4093	-	-	-	-	SRR1788017
IHD45_14	2012	Cambodia	human	feces	commensal	D	O15	H18	206	-	-	-	-	SRR1788018
IHD45_15	2012	Cambodia	human	feces	commensal	A	O153var1	H9	69	-	-	-	-	SRR1788019
IHD45_16	2012	Cambodia	human	feces	commensal	D	Gp9	H18	345	-	-	-	-	SRR1788020
IHD45_9	2012	Cambodia	human	feces	commensal	A	O75	H38_fliC_H55_fllA	29	-	-	-	-	SRR1788013
IHD717_11	2012	Cambodia	human	feces	commensal	A	O87	H7	278	-	-	-	-	SRR1788094
IHD717_14	2012	Cambodia	human	feces	commensal	B1	O45	H19	ND	-	-	-	-	SRR1788097
IHD717_9	2012	Cambodia	human	feces	commensal	A	Gp11	H23	448	-	-	-	-	SRR1788092
IHD813_9	2012	Cambodia	human	feces	commensal	A	Onovel32	H9	410	-	-	-	-	SRR1788108
IHD86_12	2012	Cambodia	human	feces	commensal	F	O1	H34	167	-	-	-	-	SRR1788031
IHD86_16	2012	Cambodia	human	feces	commensal	A	O88	H38	1614	-	-	-	-	SRR1788035
IHD86_9	2012	Cambodia	human	feces	commensal	B1	O113	H7	167	-	-	-	-	SRR1788029
Nissle1917	1917	Germany	human	feces	commensal	B2	O6	H1	88	-	-	-	-	CP022686
S250	2006	France	human	feces	commensal	B2	Onovel31	H4	131	-	-	-	-	LXQL00000000
Tob1	2000	Germany	human	feces	commensal	B2	Gp11	H10	2650*?	-	-	-	-	MIIH00000000
HS	1978	USA	human	feces	commensal	A	O9	H4	ND	-	-	-	-	CP000802
UT: untypeable
NA: not available
ND: not determined
*: the best scoring allele has >=1 mismatch
?: uncertainty in the result because the best scoring allele has some low-depth bases

## Sheet: Supple Table S3
Supplemental Table S3. Phylogenetic distributions of bovine and human commensal isolates and clinical isolates to the bovine- and human-associated lineages in three randomization experiments.
Sources of isolates	randomization 1 (%)		randomization 2 (%)		randomization 3 (%)		average (%)
	Bovine-associated lineage	Human-associated- ineage	Bovine-associated lineage	Human-associated- ineage	Bovine-associated lineage	Human-associated- ineage	Bovine-associated lineage	Human-associated- ineage
bovine commensal (randomly selected 300 strains)	94.3333	5.66667	96.3333	3.66667	97	3	95.8889	4.11111
human commensal (randomly selected 300 strains)	27	73	26.6667	73.3333	25.6667	74.3333	26.4444	73.5556
clinical STEC/EPEC (all of the 88 strains)	79.5455	20.4545	79.5455	20.4545	79.5455	20.4545	79.5455	20.4545
clinical ExPEC (all of the 111 strains)	17.3913	82.6087	17.3913	82.6087	17.3913	82.6087	17.3913	82.6087

## Sheet: Supple Table S4
Supplemental table S4. Stx types of the Stx-positive strains
Stx type	No. of strains
stx1a	23
stx1a+stx2a	9
stx1a+stx2a+stx2c/d*	20
stx1a+stx2c/d*	6
stx1c	2
stx1c+stx2c/d*	4
stx1d	3
stx2a	19
stx2a+stx2c/d*	28
stx2a+stx2g	2
stx2b	1
stx2b+stx2c/d*	1
stx2c/d*	24
stx2g	4
Total	146
* It was not possible to distinguish between stx2c and stx2d.

## Sheet: Supple Table S5
Supplemental table S5. Effect of the presence of stx or LEE on total scaffold length and the number of phages and integrases
	Gene	Estimate	SEM	P
Total scaffold length	stx	0.046568	0.004077	< 1E-15
	LEE	0.056318	0.004883	< 1E-15
No. of integrases	stx	0.11758	0.02713	1E-5
	LEE	0.39147	0.02964	< 1.0E-15
No. of phages	stx	0.38604	0.0465	< 1.0E-15
	LEE	1.02002	0.05117	< 1.0E-15
A generalized linear model (GLM) was used to determine statistical significance. All were significant (P<0.05). Correlation between stx and LEE was not significant in all the analyses (P>0.05).

## Sheet: Supple Table S6
Supplemental table S6. List of genes significantly positively or negatively associated with bovine-associated lineages
ID	Annotation	The number of trait-positive isolates this gene was found	The number of trait-negative isolates this gene was found	The number of trait-positive isolates this gene was not found	The number of trait-negative isolates this gene was not found	Bonferroni_p
G00001	Zn-dependent NAD(P)-binding oxidoreductase	646	0	1	290	5.07074e-244
G00002	inactive PncC family protein	646	0	1	290	5.07074e-244
G00003	fimbrial-like adhesin protein	644	0	3	290	7.23053e-240
G00004	D-xylose transporter	647	6	0	284	1.83367e-232
G00005	hypothetical protein	640	1	7	289	4.10794e-230
G00006	transporter	9	288	638	2	1.5623e-224
G00007	hypothetical protein	10	288	637	2	4.64116e-223
G00008	fimbrial-like adhesin protein	637	5	10	285	1.83864e-216
G00009	outer membrane usher protein FimD	637	5	10	285	1.83864e-216
G00010	TonB dependent outer membrane receptor	24	290	623	0	9.61947e-211
G00011	ferric citrate ABC transporter permease	24	290	623	0	9.61947e-211
G00012	molybdenum transport protein	24	290	623	0	9.61947e-211
G00013	methyltransferase	24	290	623	0	9.61947e-211
G00014	ligand-gated channel protein	25	290	622	0	1.21205e-209
G00015	hemin transporter	25	290	622	0	1.21205e-209
G00016	ATP-binding component of hemin transport system	25	290	622	0	1.21205e-209
G00017	hypothetical protein	25	290	622	0	1.21205e-209
G00018	coproporphyrinogen oxidase	25	290	622	0	1.21205e-209
G00019	heme utilization carrier protein	25	290	622	0	1.21205e-209
G00020	hypothetical protein	1	272	646	18	3.70773e-209
G00021	broad specificity sugar efflux system SetA	621	0	26	290	1.47311e-208
G00022	hypothetical protein	621	0	26	290	1.47311e-208
G00023	ABC transporter ATP-binding protein	24	289	623	1	5.54449e-208
G00024	ferric citrate ABC transporter permease	25	289	622	1	6.95276e-207
G00025	ABC transporter substrate-binding protein	25	289	622	1	6.95276e-207
G00026	5'-nucleotidase	9	278	638	12	5.99593e-205
G00027	periplasmic pilin chaperone	628	5	19	285	1.0057e-204
G00028	colanic acid production tyrosine-protein kinase	646	21	1	269	1.35749e-204
G00029	O-antigen capsule outer membrane auxillary protein export channel	645	21	2	269	1.7817e-202
G00030	fimbrial-like adhesin protein	625	5	22	285	3.0454e-201
G00031	O-antigen capsule production periplasmic protein	644	21	3	269	1.56466e-200
G00032	transcriptional regulator	28	287	619	3	5.94349e-199
G00033	aldo/keto reductase	28	287	619	3	5.94349e-199
G00034	aldo/keto reductases	30	287	617	3	6.77768e-197
G00035	O-antigen capsule production lipoprotein	639	21	8	269	3.1193e-192
G00036	O-antigen capsule production periplasmic protein	639	21	8	269	3.1193e-192
G00037	lipoprotein	614	4	33	286	9.18035e-192
G00038	lipoprotein	33	285	614	5	1.01915e-189
G00039	O-antigen capsule forming protein-tyrosine-phosphatase	645	31	2	259	1.91387e-188
G00040	serine protease	31	283	616	7	8.14269e-188
G00041	hypothetical protein	618	9	29	281	3.53435e-186
G00042	LysR family transcriptional regulator	621	11	26	279	8.32832e-186
G00043	adhesin	9	265	638	25	5.15583e-185
G00044	NAD(P)H-dependent oxidoreductase	619	11	28	279	9.99286e-184
G00045	disulfide bond formation protein DsbB	2	255	645	35	3.12955e-183
G00046	arylsulfate sulfotransferase	2	255	645	35	3.12955e-183
G00047	thiol:disulfide interchange protein DsbA	2	255	645	35	3.12955e-183
G00048	hypothetical protein	637	26	10	264	3.35339e-182
G00049	glycoprotein	56	290	591	0	3.40446e-181
G00050	IS150 transposase A	6	258	641	32	4.36761e-180
G00051	hypothetical protein	588	0	59	290	7.35576e-179
G00052	NADH-dependent flavin oxidoreductase	25	274	622	16	9.31798e-179
G00053	capsular polysaccharide export protein	16	266	631	24	3.5408e-177
G00054	transcriptional regulator	632	28	15	262	6.40068e-173
G00055	hypothetical protein	580	0	67	290	6.81937e-173
G00056	periplasmic pilin chaperone	617	17	30	273	4.05325e-172
G00057	outer membrane protein	632	29	15	261	1.38005e-171
G00058	transcriptional regulator	25	269	622	21	2.66245e-171
G00059	O-antigen capsule production threonine-rich inner membrane protein	621	21	26	269	2.92258e-170
G00060	outer membrane protein	615	18	32	272	1.12983e-168
G00061	fimbrial-like adhesin protein	613	17	34	273	2.84568e-168
G00062	hypothetical protein	9	251	638	39	9.01716e-167
G00063	acetolactate synthase	60	285	587	5	9.94145e-167
G00064	capsular polysaccharide transport system permease protein	14	256	633	34	2.34866e-166
G00065	polysaccharide export outer membrane protein	14	256	633	34	2.34866e-166
G00066	permease of ferrichrome ABC transporter	15	256	632	34	4.02782e-165
G00067	ferrichrome-binding protein	15	256	632	34	4.02782e-165
G00068	transcriptional regulator	15	256	632	34	4.02782e-165
G00069	ABC-type iron-siderophore transport system ATP-binding protein	15	256	632	34	4.02782e-165
G00070	ferrichrome iron receptor precursor	15	256	632	34	4.02782e-165
G00071	hydrolase	23	263	624	27	4.21082e-165
G00072	hypothetical protein	641	45	6	245	4.70433e-164
G00073	permease of ferrichrome ABC transporter	15	255	632	35	7.25177e-164
G00074	3-deoxy-manno-octulosonate cytidylyltransferase	14	254	633	36	7.48863e-164
G00075	arabinose-5-phosphate isomerase	14	254	633	36	7.48863e-164
G00076	hypothetical protein	18	256	629	34	1.43092e-161
G00077	periplasmic pilin chaperone	647	58	0	232	1.04189e-160
G00078	fimbrial protein	647	58	0	232	1.04189e-160
G00079	hypothetical protein	562	0	85	290	1.25441e-160
G00080	multidrug-efflux transport protein precursor	25	261	622	29	2.31678e-160
G00081	multidrug efflux system protein	25	261	622	29	2.31678e-160
G00082	outer membrane channel protein	25	261	622	29	2.31678e-160
G00083	NAD(P)-dependent oxidoreductase	604	17	43	273	3.04278e-160
G00084	membrane transport protein	25	260	622	30	4.59579e-159
G00085	fimbrial-like adhesin protein	646	58	1	232	2.22875e-158
G00086	outer membrane usher protein FimD	644	58	3	232	1.72105e-154
G00087	hypothetical protein	551	0	96	290	8.74744e-154
G00088	tyramine oxidase	619	32	28	258	1.66894e-153
G00089	phenylacetaldehyde dehydrogenase	619	32	28	258	1.66894e-153
G00090	periplasmic pilin chaperone	643	58	4	232	9.31885e-153
G00091	transcription regulatory protein	24	254	623	36	1.41431e-152
G00092	hypothetical protein	559	3	88	287	1.35542e-151
G00093	inner membrane protein	90	287	557	3	2.37321e-150
G00094	phenylacetyl-CoA ligase	614	32	33	258	9.18373e-149
G00095	hypothetical protein	4	228	643	62	1.5917e-148
G00096	hypothetical protein	629	46	18	244	2.71103e-147
G00097	2,3-dehydroadipyl-CoA hydratase	611	32	36	258	4.63179e-146
G00098	1,2-phenylacetyl-CoA epoxidase subunit E	610	32	37	258	3.50988e-145
G00099	PTS system fructose-specific IIB component	12	235	635	55	1.69801e-144
G00100	1,2-phenylacetyl-CoA epoxidase subunit B	609	32	38	258	2.5983e-144
G00101	phenylacetate-CoA oxygenase	609	32	38	258	2.5983e-144
G00102	1,2-phenylacetyl-CoA epoxidase subunit A	609	32	38	258	2.5983e-144
G00103	oxepin-CoA hydrolase and 3-oxo-5,6-dehydrosuberyl-CoA semialdehyde dehydrogenase	609	32	38	258	2.5983e-144
G00104	phenylacetate-CoA oxygenase	609	32	38	258	2.5983e-144
G00105	3-oxoadipyl-CoA/3-oxo-5,6-dehydrosuberyl-CoA thiolase	608	32	39	258	1.88033e-143
G00106	3-hydroxyadipyl-CoA dehydrogenase	608	32	39	258	1.88033e-143
G00107	1,2-epoxyphenylacetyl-CoA isomerase	608	32	39	258	1.88033e-143
G00108	hydroxyphenylacetyl-CoA thioesterase	608	32	39	258	1.88033e-143
G00109	enzyme IIA component of PTS	14	236	633	54	4.13422e-143
G00110	fructose-bisphosphate aldolase class II	14	236	633	54	4.13422e-143
G00111	PTS system fructose-specific IIC component	14	236	633	54	4.13422e-143
G00112	fructose-bisphosphate aldolase class II	14	236	633	54	4.13422e-143
G00113	hypothetical protein	14	236	633	54	4.13422e-143
G00114	multidrug resistance efflux pump	11	232	636	58	1.40365e-142
G00115	transcriptional regulator	12	233	635	57	2.3025e-142
G00116	fructokinase	14	235	633	55	4.88249e-142
G00117	transcriptional regulator	14	235	633	55	4.88249e-142
G00118	adhesin	646	74	1	216	6.50518e-142
G00119	hypothetical protein	1	216	646	74	6.50518e-142
G00120	peptidase	646	75	1	215	6.22489e-141
G00121	PTS enzyme IIB component/IIC component	646	75	1	215	6.22489e-141
G00122	multidrug efflux protein	12	231	635	59	2.92677e-140
G00123	PTS system IIA component	646	76	1	214	5.88633e-140
G00124	enzyme IIA component of PTS	646	76	1	214	5.88633e-140
G00125	fimbrial-like adhesin protein	633	58	14	232	7.28017e-139
G00126	sor-operon regulator	107	286	540	4	2.433e-138
G00127	sorbitol-6-phosphate 2-dehydrogenase	107	286	540	4	2.433e-138
G00128	sorbose-permease PTS system IIC component	107	286	540	4	2.433e-138
G00129	sorbose-permease PTS system IIB component	107	286	540	4	2.433e-138
G00130	CcdB-like protein	29	246	618	44	2.70932e-138
G00131	CcdA-like protein	29	246	618	44	2.70932e-138
G00132	hypothetical protein	644	74	3	216	4.17061e-138
G00133	antitoxin for the HicAB toxin-antitoxin system	646	78	1	212	5.08259e-138
G00134	outer membrane protein	647	81	0	209	2.00583e-137
G00135	T3SS secreted effector EspL	643	73	4	217	2.16363e-137
G00136	molecular chaperone DnaJ	619	46	28	244	5.26035e-137
G00137	capsular polysaccharide transport system permease protein	14	230	633	60	8.77163e-137
G00138	periplasmic pilin chaperone	647	82	0	208	1.78323e-136
G00139	sorbose-permease PTS system IIA component	107	285	540	5	1.93129e-136
G00140	L-sorbose 1-phosphate dehydrogenase	107	285	540	5	1.93129e-136
G00141	sorbose PTS component	107	285	540	5	1.93129e-136
G00142	melibiose:sodium symporter	640	72	7	218	8.75334e-134
G00143	cytochrome	549	11	98	279	2.07701e-131
G00144	mRNA interferase toxin of toxin-antitoxin pair YafQ/DinJ	566	18	81	272	2.49275e-131
G00145	type IV secretion protein Rhs	615	48	32	242	3.95266e-131
G00146	penicillin binding protein PBP4B	640	75	7	215	7.15112e-131
G00147	fimbrial-like adhesin protein	1	204	646	86	1.81394e-130
G00148	alpha-mannosidase	621	54	26	236	2.70076e-130
G00149	hypothetical protein	623	56	24	234	3.73089e-130
G00150	hypothetical protein	591	32	56	258	4.03906e-130
G00151	inner membrane protein	507	0	140	290	4.92438e-130
G00152	inner membrane protein	636	71	11	219	2.06627e-129
G00153	2-O-a-mannosyl-D-glycerate specific PTS enzyme IIABC component	622	56	25	234	3.54784e-129
G00154	glutamyl-tRNA amidotransferase	11	218	636	72	1.93486e-128
G00155	hypothetical protein	11	218	636	72	1.93486e-128
G00156	hypothetical protein	11	218	636	72	1.93486e-128
G00157	cysteine hydrolases superfamily protein	11	218	636	72	1.93486e-128
G00158	cytosine permease	11	218	636	72	1.93486e-128
G00159	transcriptional repressor	621	56	26	234	3.25611e-128
G00160	inner membrane protein	513	2	134	288	3.37664e-128
G00161	TusA family sulfurtransferase	635	71	12	219	3.57999e-128
G00162	PTS system IIB component / IIC component	0	199	647	91	3.87702e-128
G00163	transketolase	0	199	647	91	3.87702e-128
G00164	fimbrial-like adhesin protein	642	81	5	209	3.9734e-128
G00165	zinc-binding dehydrogenase	4	207	643	83	7.7785e-128
G00166	hypothetical protein	11	217	636	73	1.78912e-127
G00167	hydrogenase 4 Fe-S subunit	647	92	0	198	3.11426e-127
G00168	transcriptional regulator	0	198	647	92	3.11426e-127
G00169	antitoxin of YafQ-DinJ toxin-antitoxin system	568	22	79	268	3.3989e-127
G00170	phosphosugar isomerase	0	197	647	93	2.47801e-126
G00171	C4-dicarboxylate ABC transporter substrate-binding	5	207	642	83	2.92286e-126
G00172	GntR family transcriptional regulator	5	206	642	84	2.46674e-125
G00173	fructuronate reductase	5	206	642	84	2.46674e-125
G00174	C4-dicarboxylate ABC transporter permease	5	206	642	84	2.46674e-125
G00175	C4-dicarboxylate transport system large permease component	5	206	642	84	2.46674e-125
G00176	hydrogenase 4 Fe-S subunit	646	92	1	198	5.42972e-125
G00177	processing element hydrogenase 4	646	92	1	198	5.42972e-125
G00178	formate transporter	646	92	1	198	5.42972e-125
G00179	hydrogenase 4 membrane subunit	646	92	1	198	5.42972e-125
G00180	fimbrial-like adhesin protein	1	198	646	92	5.42972e-125
G00181	D,D-dipeptide ABC transporter ATPase	647	95	0	195	1.52572e-124
G00182	D,D-dipeptide ABC transporter ATPase	647	95	0	195	1.52572e-124
G00183	hypothetical protein	505	2	142	288	2.64918e-124
G00184	hypothetical protein	500	1	147	289	3.70422e-124
G00185	methylmalonyl-CoA decarboxylase	646	93	1	197	4.29295e-124
G00186	malate/L-lactate dehydrogenase-family protein	5	204	642	86	1.7023e-123
G00187	hydrogenase 4 membrane subunit	645	92	2	198	4.75625e-123
G00188	transcriptional activator HyfR	645	92	2	198	4.75625e-123
G00189	hypothetical protein	9	209	638	81	1.79713e-122
G00190	D,D-dipeptide ABC transporter permease	646	95	1	195	2.60949e-122
G00191	D-ala-D-ala dipeptidase	646	95	1	195	2.60949e-122
G00192	hypothetical protein	1	195	646	95	2.60949e-122
G00193	membrane ATPase/protein kinase	645	93	2	197	3.73666e-122
G00194	hypothetical protein	9	208	638	82	1.51296e-121
G00195	TPR-like repeat protein	539	14	108	276	2.34062e-121
G00196	hydrogenase 4 membrane subunit	644	92	3	198	2.7909e-121
G00197	hydrogenase 4 membrane subunit	644	92	3	198	2.7909e-121
G00198	diguanylate cyclase	647	99	0	191	5.18831e-121
G00199	hypothetical protein	643	91	4	199	1.57573e-120
G00200	hypothetical protein	4	199	643	91	1.57573e-120
G00201	hypothetical protein	645	95	2	195	2.2425e-120
G00202	D,D-dipeptide ABC transporter permease	645	95	2	195	2.2425e-120
G00203	putrescine inducible repressor for the divergent puu operons	647	100	0	190	3.87567e-120
G00204	glutamate--putrescine ligase	647	100	0	190	3.87567e-120
G00205	transporter	647	100	0	190	3.87567e-120
G00206	curcumin/dihydrocurcumin reductase	647	100	0	190	3.87567e-120
G00207	putrescine importer	647	100	0	190	3.87567e-120
G00208	aldehyde dehydrogenase	647	100	0	190	3.87567e-120
G00209	transcriptional regulator MurR	647	100	0	190	3.87567e-120
G00210	gamma-glutamyl-gamma-aminobutyrate hydrolase	647	100	0	190	3.87567e-120
G00211	hypothetical protein	0	190	647	100	3.87567e-120
G00212	hydrogenase 4 membrane subunit	643	92	4	198	1.23412e-119
G00213	transporter	647	101	0	189	2.8703e-119
G00214	putative diogenase beta subunit	647	101	0	189	2.8703e-119
G00215	dioxygenase alpha subunit	647	101	0	189	2.8703e-119
G00216	hca operon transcriptional regulator	647	101	0	189	2.8703e-119
G00217	NADPH-dependent FMN reductase	0	189	647	101	2.8703e-119
G00218	transcriptional regulator	11	208	636	82	5.16156e-119
G00219	transcriptional regulator LYSR-type	604	51	43	239	8.52512e-119
G00220	carbonic anhydrase	646	99	1	191	8.64647e-119
G00221	fimbrial-like adhesin protein	643	93	4	197	9.57384e-119
G00222	hypothetical protein	10	206	637	84	1.98228e-118
G00223	2-keto-3-deoxy-galactonokinase	10	206	637	84	1.98228e-118
G00224	ABC transporter substrate-binding protein	10	206	637	84	1.98228e-118
G00225	C4-dicarboxylate ABC transporter permease	10	206	637	84	1.98228e-118
G00226	type IV secretion protein Rhs	598	47	49	243	2.01137e-118
G00227	autoinducer-2 aldolase	647	102	0	188	2.1077e-118
G00228	transporter	647	102	0	188	2.1077e-118
G00229	membrane protein	512	7	135	283	2.24538e-118
G00230	gamma-glutamylputrescine oxidoreductase	646	100	1	190	6.41675e-118
G00231	methyl-accepting chemotaxis protein IV	646	100	1	190	6.41675e-118
G00232	hypothetical protein	1	190	646	100	6.41675e-118
G00233	4-hydroxythreonine-4-phosphate dehydrogenase 2	1	190	646	100	6.41675e-118
G00234	integral membrane protenin	1	190	646	100	6.41675e-118
G00235	inner membrane protein	1	190	646	100	6.41675e-118
G00236	hypothetical protein	1	190	646	100	6.41675e-118
G00237	hypothetical protein	1	190	646	100	6.41675e-118
G00238	alcohol dehydrogenase	1	190	646	100	6.41675e-118
G00239	hypothetical protein	480	0	167	290	1.32391e-117
G00240	hypothetical protein	0	187	647	103	1.53473e-117
G00241	transcriptional regulator	10	205	637	85	1.60599e-117
G00242	L-rhamnonate transporter	162	289	485	1	2.59148e-117
G00243	3-phenylpropionate dioxygenase small subunit	646	101	1	189	4.72107e-117
G00244	3-phenylpropionate dioxygenase ferredoxin subunit	646	101	1	189	4.72107e-117
G00245	2,3-dihydroxy-2,3-dihydrophenylpropionate dehydrogenase	646	101	1	189	4.72107e-117
G00246	transcriptional regulator	1	189	646	101	4.72107e-117
G00247	cyanate transporter	645	99	2	191	7.24085e-117
G00248	cyanate aminohydrolase	645	99	2	191	7.24085e-117
G00249	transcriptional regulator	614	61	33	229	7.35498e-117
G00250	ATP-dependent helicase	647	104	0	186	1.10825e-116
G00251	outer membrane protein	0	186	647	104	1.10825e-116
G00252	periplasmic pilin chaperone	0	186	647	104	1.10825e-116
G00253	fimbrial-like adhesin protein	0	186	647	104	1.10825e-116
G00254	2-oxoglutarate decarboxylase	2	190	645	100	5.33867e-116
G00255	succinyl-CoA synthetase beta subunit	2	190	645	100	5.33867e-116
G00256	response regulator in two-component system	2	190	645	100	5.33867e-116
G00257	dihydrolipoamide dehydrogenase	2	190	645	100	5.33867e-116
G00258	di-and tricarboxylate transporter	2	190	645	100	5.33867e-116
G00259	4-aminobutyrate aminotransferase	645	100	2	190	5.33867e-116
G00260	lactamase	0	185	647	105	7.93721e-116
G00261	hypothetical protein	632	81	15	209	2.87755e-115
G00262	PTS system arbutin-like IIC component	640	92	7	198	3.34567e-115
G00263	6-phospho-alpha-glucosidase	640	92	7	198	3.34567e-115
G00264	GntR family transcriptional regulator	640	92	7	198	3.34567e-115
G00265	3-phenylpropionate dioxygenase large subunit	645	101	2	189	3.90223e-115
G00266	transcriptional activator of dmlA	645	101	2	189	3.90223e-115
G00267	2-oxoglutarate dehydrogenase E2 component (dihydrolipoamide succinyltransferase)	2	189	645	101	3.90223e-115
G00268	ABC transporter permease	2	189	645	101	3.90223e-115
G00269	D,D-dipeptide ABC transporter permease	2	189	645	101	3.90223e-115
G00270	ABC transporter ATP-binding protein	2	189	645	101	3.90223e-115
G00271	ABC transporter ATP-binding protein	2	189	645	101	3.90223e-115
G00272	ABC-type dipeptide transport system periplasmic component	2	189	645	101	3.90223e-115
G00273	dehydrogenase	2	189	645	101	3.90223e-115
G00274	hypothetical protein	0	184	647	106	5.63841e-115
G00275	hypothetical protein	13	206	634	84	8.26482e-115
G00276	LuxR family transcriptional regulator	632	82	15	208	2.33816e-114
G00277	hypothetical protein	645	102	2	188	2.82796e-114
G00278	succinyl-CoA synthetase alpha subunit	2	188	645	102	2.82796e-114
G00279	hypothetical protein	0	183	647	107	3.97324e-114
G00280	murein hydrolase effector protein LrgB	0	183	647	107	3.97324e-114
G00281	fimbrial adhesin	0	183	647	107	3.97324e-114
G00282	transcriptional regulator	0	183	647	107	3.97324e-114
G00283	2-keto-3-deoxy gluconate aldolase	1	185	646	105	1.27129e-113
G00284	D-malate oxidase	644	101	3	189	2.16109e-113
G00285	outer membrane usher protein FimD	639	93	8	197	5.70315e-113
G00286	hypothetical protein	1	184	646	106	8.97062e-113
G00287	sensory histidine kinase in two-component system	2	186	645	104	1.44808e-112
G00288	type VI secretion system Vgr family protein	588	46	59	244	2.0605e-112
G00289	hypothetical protein	636	90	11	200	8.07089e-112
G00290	autotransporter protein	643	101	4	189	9.02114e-112
G00291	iron transport protein	0	180	647	110	1.32576e-111
G00292	hypothetical protein	641	98	6	192	2.29399e-111
G00293	hydrogen peroxide resistance OB fold protein	642	101	5	189	3.02757e-110
G00294	Hcp1 family type VI secretion system effector	3	185	644	105	5.5201e-110
G00295	toxin HipA	0	178	647	112	6.13531e-110
G00296	hypothetical protein	1	180	646	110	2.05287e-109
G00297	autoinducer-2 degrading protein LsrG	642	102	5	188	2.15156e-109
G00298	autoinducer 2-binding protein	642	102	5	188	2.15156e-109
G00299	phenylpropionate dioxygenase ferredoxin reductase subunit	641	101	6	189	8.50916e-109
G00300	hypothetical protein	1	179	646	111	1.3923e-108
G00301	hypothetical protein	3	183	644	107	2.6545e-108
G00302	porin thermoregulatory transcriptional activator	635	93	12	197	5.17716e-108
G00303	hypothetical protein	635	93	12	197	5.17716e-108
G00304	arylsulfatase	9	192	638	98	2.38046e-107
G00305	autoinducer 2 import system permease protein	640	102	7	188	1.44515e-106
G00306	inner membrane protein	609	68	38	222	4.3439e-106
G00307	type-1 fimbrial protein subunit A	633	93	14	197	9.60242e-106
G00308	lactose/glucose efflux system	627	86	20	204	1.40171e-105
G00309	transcriptional regulator	506	14	141	276	5.44296e-105
G00310	fructoselysine transporter	506	14	141	276	5.44296e-105
G00311	fructoselysine-6-P-deglycase	506	14	141	276	5.44296e-105
G00312	fructoselysine 3-epimerase	506	14	141	276	5.44296e-105
G00313	fructoselysine 6-kinase	505	14	142	276	1.55929e-104
G00314	fimbrial usher protein	625	85	22	205	1.5995e-104
G00315	hypothetical protein	1	174	646	116	1.78335e-104
G00316	transcriptional activator of cyn operon	636	99	11	191	4.68959e-104
G00317	hypothetical protein	486	9	161	281	2.46876e-103
G00318	aminobenzoyl-glutamate utilization protein A	25	205	622	85	9.50874e-102
G00319	MFS transporter	25	205	622	85	9.50874e-102
G00320	fimbrial family protein	619	82	28	208	1.02722e-101
G00321	hypothetical protein	636	102	11	188	1.53981e-101
G00322	hypothetical protein	478	8	169	282	1.8574e-101
G00323	moco-containing subunit of PaoABC aldehyde oxidoreductase	606	71	41	219	4.81819e-101
G00324	hypothetical protein	0	167	647	123	5.23704e-101
G00325	hypothetical protein	620	84	27	206	7.66904e-101
G00326	lipoprotein	628	93	19	197	1.55899e-100
G00327	iron ABC transporter ATP-binding component	62	234	585	56	1.74681e-100
G00328	aminobenzoyl-glutamate transport protein	632	98	15	192	2.05315e-100
G00329	moco insertion factor for PaoABC aldehyde oxidoreductase	605	71	42	219	2.68171e-100
G00330	hypothetical protein	625	90	22	200	3.34499e-100
G00331	iron ABC transporter permease component	61	233	586	57	3.58721e-100
G00332	iron ABC transporter substrate binding component	62	233	585	57	1.55625e-99
G00333	outer membrane protein	0	165	647	125	2.01106e-99
G00334	aminobenzoyl-glutamate utilization protein A	630	97	17	193	3.60701e-99
G00335	hypothetical protein	530	28	117	262	5.65128e-99
G00336	iron ABC transporter permease component	60	231	587	59	6.28603e-99
G00337	autoinducer 2 import ATP-binding protein	631	99	16	191	1.57447e-98
G00338	xanthine dehydrogenase	606	74	41	216	2.31537e-98
G00339	fimbrial protein	623	90	24	200	2.31592e-98
G00340	aminobenzoyl-glutamate utilization protein B	630	98	17	192	2.4631e-98
G00341	transcriptional regulator of abgABT operon	629	97	18	193	3.66709e-98
G00342	hypothetical protein	609	77	38	213	5.59551e-98
G00343	post-segregational killing toxin	539	33	108	257	6.81425e-98
G00344	plasmid maintenance protein	539	33	108	257	6.81425e-98
G00345	lsr operon transcriptional repressor	629	98	18	192	2.48887e-97
G00346	ribosome association toxin A-like protein	1	165	646	125	2.80108e-97
G00347	2-hydroxyacid dehydrogenase	1	165	646	125	2.80108e-97
G00348	hypothetical protein	468	8	179	282	4.14635e-97
G00349	inner membrane protein	2	167	645	123	5.25964e-97
G00350	hypothetical protein	3	169	644	121	6.62988e-97
G00351	hypothetical protein	642	118	5	172	3.01635e-96
G00352	hypothetical protein	486	15	161	275	6.90449e-95
G00353	inner membrane protein	643	122	4	168	1.48037e-94
G00354	arsenical resistance operon transcriptional repressor	629	102	18	188	4.82055e-94
G00355	arylsulfatase	629	102	18	188	4.82055e-94
G00356	fimbrial chaperone protein precursor	0	158	647	132	5.737e-94
G00357	PTS glucose transporter subunit IIBC	54	221	593	69	1.00566e-93
G00358	Auf fimbriae major subunit precursor AufA	0	157	647	133	3.36456e-93
G00359	hypothetical protein	482	15	165	275	4.0596e-93
G00360	outer membrane usher protein	542	39	105	251	4.1699e-93
G00361	minor pilin protein	542	39	105	251	4.1699e-93
G00362	dehydrogenase	54	220	593	70	7.65894e-93
G00363	inner membrane protein	625	99	22	191	1.06531e-92
G00364	hypothetical protein	614	88	33	202	1.86175e-92
G00365	transcriptional repressor	644	127	3	163	3.29747e-92
G00366	oxidoreductase	644	127	3	163	3.29747e-92
G00367	transcriptional regulator	0	155	647	135	1.13592e-91
G00368	fimbrial subunit	537	38	110	252	1.16285e-91
G00369	membrane protein	5	166	642	124	1.56161e-91
G00370	hypothetical protein	430	3	217	287	3.4672e-91
G00371	hypothetical protein	17	183	630	107	5.31543e-91
G00372	hypothetical protein	0	154	647	136	6.53989e-91
G00373	fimbrial adhesin	0	154	647	136	6.53989e-91
G00374	hypothetical protein	543	42	104	248	1.34579e-90
G00375	fimbrial protein	0	153	647	137	3.74253e-90
G00376	membrane protein	409	0	238	290	4.25043e-90
G00377	hypothetical protein	623	100	24	190	4.25796e-90
G00378	response regulator	612	89	35	201	4.50174e-90
G00379	membrane protein	645	132	2	158	5.04555e-90
G00380	isomerase	53	216	594	74	5.06607e-90
G00381	hypothetical protein	4	162	643	128	6.76923e-90
G00382	plasmid stabilization system protein	502	25	145	265	1.6112e-89
G00383	transcriptional regulator	0	152	647	138	2.1289e-89
G00384	enoyl-CoA hydratase	0	152	647	138	2.1289e-89
G00385	acetyl-CoA-transferase	0	152	647	138	2.1289e-89
G00386	oxidoreductase	0	152	647	138	2.1289e-89
G00387	serine protease EspP	5	163	642	127	3.23432e-89
G00388	toxin-plasmid maintenance system killer protein	19	183	628	107	4.61895e-89
G00389	transcriptional regulator	637	119	10	171	4.88204e-89
G00390	transcriptional regulator	44	207	603	83	1.76577e-88
G00391	sugar kinases	44	207	603	83	1.76577e-88
G00392	fructokinase	44	207	603	83	1.76577e-88
G00393	alpha-amylase	604	84	43	206	2.3871e-88
G00394	HicA-like protein	493	23	154	267	5.22058e-88
G00395	hypothetical protein	44	206	603	84	1.19159e-87
G00396	sugar uptake ABC transporter ATP-binding protein	44	206	603	84	1.19159e-87
G00397	tagatose-bisphosphate aldolase	44	206	603	84	1.19159e-87
G00398	sugar uptake ABC transporter periplasmicsolute-binding protein precursor	44	206	603	84	1.19159e-87
G00399	hypothetical protein	640	126	7	164	2.66776e-87
G00400	carbohydrate ABC transport system permease	44	205	603	85	7.95147e-87
G00401	hypothetical protein	146	263	501	27	8.3529e-87
G00402	mhp operon transcriptional activator	646	139	1	151	1.50835e-86
G00403	3-(3-hydroxyphenyl)propionate hydroxylase	646	139	1	151	1.50835e-86
G00404	4-hyroxy-2-oxovalerate/4-hydroxy-2-oxopentanoic acid aldolase	646	139	1	151	1.50835e-86
G00405	2,3-dihydroxyphenylpropionate 1,2-dioxygenase	646	139	1	151	1.50835e-86
G00406	acetaldehyde-CoA dehydrogenase II	646	139	1	151	1.50835e-86
G00407	2-keto-4-pentenoate hydratase	646	139	1	151	1.50835e-86
G00408	type VI secretion system Vgr family protein	16	176	631	114	1.7394e-86
G00409	toxin-antitoxin system antitoxin component	467	16	180	274	6.23932e-86
G00410	acetyltransferase	467	16	180	274	6.23932e-86
G00411	transcriptional regulator	505	30	142	260	2.11156e-85
G00412	hypothetical protein	466	16	181	274	2.75541e-85
G00413	type VI secretion system effector Hcp1 family protein	538	45	109	245	2.89412e-85
G00414	inner membrane division septum protein	622	105	25	185	2.92918e-85
G00415	hypothetical protein	19	178	628	112	3.81818e-85
G00416	transcriptional regulator	16	174	631	116	6.10561e-85
G00417	alkylhydroperoxidase	16	174	631	116	6.10561e-85
G00418	2-hydroxy-6-ketonona-2,4-dienedioic acid hydrolase	645	139	2	151	9.50918e-85
G00419	fimbrial protein	524	39	123	251	1.41939e-84
G00420	type IV secretion protein Rhs	512	34	135	256	2.87941e-84
G00421	cystathionine beta-lyase	49	205	598	85	1.82943e-83
G00422	colicin immunity protein	3	151	644	139	4.02166e-83
G00423	regulator of the 4HPA-hydroxylase operon	539	48	108	242	6.25213e-83
G00424	L-rhamnonate transporter	539	48	108	242	6.25213e-83
G00425	lyase	535	46	112	244	6.5164e-83
G00426	hypothetical protein	2	148	645	142	1.58332e-82
G00427	type VI secretion protein	5	154	642	136	2.01053e-82
G00428	type VI secretion system protein ImpH	5	154	642	136	2.01053e-82
G00429	sugar phosphate isomerase	631	120	16	170	6.86052e-82
G00430	hypothetical protein	530	45	117	245	1.50918e-81
G00431	3-hydroxyphenylpropionic transporter	646	146	1	144	2.24163e-81
G00432	hypothetical protein	1	143	646	147	1.20095e-80
G00433	CRISPR-associated protein Cas1	581	76	66	214	2.05419e-80
G00434	type VI secretion system protein ImpB	5	151	642	139	3.29766e-80
G00435	hypothetical protein	5	151	642	139	3.29766e-80
G00436	type VI secretion protein	5	151	642	139	3.29766e-80
G00437	hypothetical protein	595	87	52	203	6.14796e-80
G00438	multidrug efflux system protein	646	148	1	142	6.3983e-80
G00439	AidA-I family adhesin	437	12	210	278	1.0457e-79
G00440	hypothetical protein	631	123	16	167	1.23076e-79
G00441	type VI secretion system protein ImpJ	5	150	642	140	1.78312e-79
G00442	DNA repair protein	493	31	154	259	2.53405e-79
G00443	transcriptional activator for tynA and feaB	622	113	25	177	4.15656e-79
G00444	integrase	94	230	553	60	5.30884e-79
G00445	autotransporter	109	238	538	52	7.68768e-79
G00446	conjugative transfer protein	5	149	642	141	9.58354e-79
G00447	2-keto-3-deoxy-L-rhamnonate aldolase	545	56	102	234	1.34369e-78
G00448	MFS transporter	627	120	20	170	3.72383e-78
G00449	transcriptional regulator	31	182	616	108	3.98327e-78
G00450	MFS transporter	96	230	551	60	5.02409e-78
G00451	ABC transporter ATP-binding protein	96	230	551	60	5.02409e-78
G00452	transcriptional regulator	96	230	551	60	5.02409e-78
G00453	thioesterase	96	230	551	60	5.02409e-78
G00454	salicylate synthetase	96	230	551	60	5.02409e-78
G00455	siderophore biosynthetic protein	96	230	551	60	5.02409e-78
G00456	2,3-dihydroxybenzoate-AMP ligase	96	230	551	60	5.02409e-78
G00457	ligand-gated channel protein	96	230	551	60	5.02409e-78
G00458	4-hydroxyphenylacetate 3-monooxygenase	545	57	102	233	9.89342e-78
G00459	5-carboxymethyl-2-hydroxymuconate isomerase	545	57	102	233	9.89342e-78
G00460	4-hydroxyphenylacetic hydroxylase	545	57	102	233	9.89342e-78
G00461	2-hydroxyhepta-2,4-diene-1,7-dioate isomerase	545	57	102	233	9.89342e-78
G00462	5-carboxy-2-hydroxymuconate semialdehyde dehydrogenase	545	57	102	233	9.89342e-78
G00463	hypothetical protein	0	136	647	154	1.17715e-77
G00464	type III secretion protein EpaO	576	76	71	214	1.29265e-77
G00465	hypothetical protein	496	34	151	256	1.76838e-77
G00466	hypothetical protein	31	181	616	109	2.26485e-77
G00467	homoprotocatechuate dyoxygenase	544	57	103	233	2.92341e-77
G00468	2-keto-4-pentenoate hydratase	544	57	103	233	2.92341e-77
G00469	homoprotocatechuate degradative operon repressor	544	57	103	233	2.92341e-77
G00470	Hsp70 family chaperone Hsc62	630	125	17	165	3.37688e-77
G00471	siderophore biosynthetic protein	96	229	551	61	3.55977e-77
G00472	oxidoreductase	96	229	551	61	3.55977e-77
G00473	type VI secretion system effector Hcp1 family protein	11	156	636	134	1.2471e-76
G00474	ABC transporter substrate-binding protein	161	259	486	31	1.9281e-76
G00475	4-oxalocrotonate tautomerase	600	96	47	194	4.18984e-76
G00476	sensory histidine kinase in two-component regulatory system with AtoC	262	287	385	3	6.42445e-76
G00477	acetyl-CoA acetyltransferase	262	287	385	3	6.42445e-76
G00478	short chain fatty acid transporter	262	287	385	3	6.42445e-76
G00479	transcriptional regulator for the rhm operon	161	258	486	32	1.37256e-75
G00480	acetate CoA-transferase subunit beta	263	287	384	3	1.59734e-75
G00481	phosphoenolpyruvate-protein phosphoryltransferase PptE	0	133	647	157	1.60554e-75
G00482	transporter subunit	96	227	551	63	1.70427e-75
G00483	hypothetical protein	588	88	59	202	6.41191e-75
G00484	hypothetical protein	9	150	638	140	1.65509e-74
G00485	J domain-containing HscC co-chaperone	627	125	20	165	1.79215e-74
G00486	hypothetical protein	591	91	56	199	2.23738e-74
G00487	stationary phase growth adaptation protein	550	64	97	226	3.43939e-74
G00488	fimbrial protein	585	87	62	203	5.7805e-74
G00489	type III secretion protein EprJ	575	80	72	210	6.81134e-74
G00490	acetoacetyl-CoA transferase beta subunit	263	286	384	4	8.27691e-74
G00491	hypothetical protein	2	135	645	155	3.7048e-73
G00492	transcriptional regulator	573	80	74	210	7.82023e-73
G00493	transposase	97	224	550	66	1.48808e-72
G00494	hypothetical protein	566	76	81	214	2.34486e-72
G00495	hypothetical protein	570	79	77	211	4.73482e-72
G00496	5'-nucleotidase	0	128	647	162	5.24168e-72
G00497	protease	578	85	69	205	1.24339e-71
G00498	hypothetical protein	477	33	170	257	3.14085e-71
G00499	hypothetical protein	25	166	622	124	5.13782e-71
G00500	hypothetical lipoprotein	25	166	622	124	5.13782e-71
G00501	hypothetical protein	25	166	622	124	5.13782e-71
G00502	reductase	299	290	348	0	1.16084e-70
G00503	5'-nucleotidase	0	126	647	164	1.28809e-70
G00504	hydrolase	355	1	292	289	2.23619e-70
G00505	hypothetical protein	644	157	3	133	3.44641e-70
G00506	type III secretion protein EpaR	555	72	92	218	4.02722e-70
G00507	acetoacetate metabolism regulatory protein AtoC	264	283	383	7	6.12124e-69
G00508	hypothetical protein	458	29	189	261	2.77285e-68
G00509	mRNA interferase toxin	636	146	11	144	4.36874e-68
G00510	hypothetical protein	619	125	28	165	5.56676e-68
G00511	transmembrane transport protein	0	122	647	168	7.341e-68
G00512	iron/siderophore ABC transporter substrate binding component	0	122	647	168	7.341e-68
G00513	iron/siderophore ABC transporter ATP-binding component	0	122	647	168	7.341e-68
G00514	antitoxin of toxin-antitoxin system	636	147	11	143	2.16241e-67
G00515	thioredoxin	11	143	636	147	2.16241e-67
G00516	hemolysin E	647	169	0	121	3.54453e-67
G00517	hypothetical protein	12	144	635	146	4.62659e-67
G00518	enterotoxin TieB protein	10	141	637	149	4.63872e-67
G00519	hypothetical protein	497	46	150	244	6.18227e-67
G00520	integrase	43	178	604	112	7.24216e-67
G00521	helix-turn-helix transcriptional regulator	561	80	86	210	7.99328e-67
G00522	type III secretion protein SctU	554	76	93	214	1.45376e-66
G00523	hypothetical protein	30	165	617	125	1.6795e-66
G00524	2'-5' RNA ligase	30	165	617	125	1.6795e-66
G00525	hypothetical protein	0	120	647	170	1.70346e-66
G00526	outer membrane receptor	10	140	637	150	2.27313e-66
G00527	hypothetical protein	7	135	640	155	2.70912e-66
G00528	transcriptional regulator	555	77	92	213	2.87496e-66
G00529	phage excisionase	41	175	606	115	5.09207e-66
G00530	ABC transporter ATP-binding protein	11	141	636	149	5.2036e-66
G00531	ABC transporter permease	11	141	636	149	5.2036e-66
G00532	type III secretion protein EpaQ	559	80	88	210	7.08805e-66
G00533	fimbrial-like adhesin protein	1	122	646	168	7.18328e-66
G00534	hypothetical protein	11	140	636	150	2.53e-65
G00535	ABC transporter permease	11	140	636	150	2.53e-65
G00536	hypothetical protein	11	140	636	150	2.53e-65
G00537	hypothetical protein	11	140	636	150	2.53e-65
G00538	iron/siderophore ABC transporter permease component	0	118	647	172	3.88012e-65
G00539	aldolase	68	195	579	95	9.62427e-65
G00540	phosphotransferase system enzyme IIA	68	195	579	95	9.62427e-65
G00541	phosphotransferase system enzyme IIC	68	195	579	95	9.62427e-65
G00542	GntR family regulatory protein	68	195	579	95	9.62427e-65
G00543	L-fuculokinase	68	195	579	95	9.62427e-65
G00544	NADH:ubiquinone oxidoreductase subunit C	11	139	636	151	1.22288e-64
G00545	DNA repair protein	496	48	151	242	1.32238e-64
G00546	T3SS secreted effector EspX	546	74	101	216	1.79571e-64
G00547	hypothetical protein	0	117	647	173	1.83913e-64
G00548	iron-regulated protein	10	137	637	153	2.58306e-64
G00549	TonB-dependent siderophore receptor	2	122	645	168	3.54196e-64
G00550	L-rhamnonate dehydratase	162	246	485	44	4.00792e-64
G00551	phosphotransferase system HPr enzyme	68	194	579	96	5.02214e-64
G00552	fimbrial protein	0	116	647	174	8.67773e-64
G00553	energy transducer TonB	10	136	637	154	1.2368e-63
G00554	type VI secretion system protein ImpB	486	45	161	245	1.30991e-63
G00555	fimbrial protein	0	115	647	175	4.07606e-63
G00556	hypothetical protein	539	72	108	218	6.15192e-63
G00557	chaperone	512	58	135	232	8.96882e-63
G00558	outer membrane usher protein FimD	512	58	135	232	8.96882e-63
G00559	hypothetical protein	407	18	240	272	1.19024e-62
G00560	thymol sensitivity protein	642	164	5	126	1.24741e-62
G00561	hypothetical protein	538	72	109	218	1.58312e-62
G00562	hypothetical protein	346	4	301	286	1.61724e-62
G00563	type III secretion protein EprI	547	78	100	212	6.22996e-62
G00564	phosphatase inner membrane protein	646	174	1	116	8.01956e-62
G00565	fimbrial protein	501	54	146	236	8.42887e-62
G00566	fimbrial chaperone precursor	0	113	647	177	8.87322e-62
G00567	fimbrial protein	0	113	647	177	8.87322e-62
G00568	type 1 fimbrial protein	509	58	138	232	1.21771e-61
G00569	SycD-like chaperone family TPR-repeat-containing protein	543	76	104	214	1.47335e-61
G00570	hypothetical protein	556	84	91	206	1.49129e-61
G00571	hypothetical protein	647	178	0	112	4.11259e-61
G00572	phosphotransferase system enzyme IIB	66	188	581	102	7.90264e-61
G00573	esterase	645	173	2	117	8.07275e-61
G00574	immunity protein for RhsE	313	0	334	290	9.91126e-61
G00575	transposase	528	69	119	221	1.28292e-60
G00576	hypothetical protein	450	34	197	256	1.3014e-60
G00577	hypothetical protein	607	124	40	166	1.91885e-60
G00578	hypothetical protein	10	131	637	159	2.85917e-60
G00579	multidrug ABC transporter permease/ATPase	640	164	7	126	3.32069e-60
G00580	hypothetical protein	524	68	123	222	8.48638e-60
G00581	hypothetical protein	0	110	647	180	8.71917e-60
G00582	T3SS secreted effector EspR	563	91	84	199	9.18437e-60
G00583	hypothetical protein	475	45	172	245	9.90942e-60
G00584	maltoporin	7	125	640	165	1.53513e-59
G00585	L-galactonate transporter	629	149	18	141	1.68027e-59
G00586	cation/proton antiporter	18	141	629	149	1.68027e-59
G00587	NadR-like protein	18	141	629	149	1.68027e-59
G00588	sucrose-6-phosphate hydrolase	6	123	641	167	2.18762e-59
G00589	fructokinase	6	123	641	167	2.18762e-59
G00590	fimbrial protein	3	117	644	173	2.552e-59
G00591	probable colicin immunity protein	3	117	644	173	2.552e-59
G00592	type III secretion protein EprH	527	70	120	220	2.58241e-59
G00593	transposase	647	181	0	109	3.98866e-59
G00594	dihydroxyacetone kinase subunit DhaL	0	109	647	181	3.98866e-59
G00595	3-hydroxyisobutyrate dehydrogenase GhbD	0	109	647	181	3.98866e-59
G00596	dihydroxyacetone kinase	0	109	647	181	3.98866e-59
G00597	dihydrolipoamide dehydrogenase	0	109	647	181	3.98866e-59
G00598	transporter IbgT	0	109	647	181	3.98866e-59
G00599	glycerate kinase GclK	0	109	647	181	3.98866e-59
G00600	carnitine transporter CniT	0	109	647	181	3.98866e-59
G00601	glycerol dehydrogenase CglD	0	109	647	181	3.98866e-59
G00602	MFS transporter	0	109	647	181	3.98866e-59
G00603	hypothetical protein	0	109	647	181	3.98866e-59
G00604	nicotinamide mononucleotide transporter	18	140	629	150	7.74162e-59
G00605	C4-dicarboxylate-binding periplasmic protein	18	140	629	150	7.74162e-59
G00606	C4-dicarboxylate ABC transporter permease	18	140	629	150	7.74162e-59
G00607	C4-dicarboxylate ABC transporter	18	140	629	150	7.74162e-59
G00608	transcriptional regulator	488	52	159	238	1.11971e-58
G00609	esterase	1	111	646	179	1.669e-58
G00610	PTS system cellobiose/arbutin/salicin-specific IIBC component	647	182	0	108	1.81681e-58
G00611	asc operon transcriptional repressor	647	182	0	108	1.81681e-58
G00612	transcriptional regulator	0	108	647	182	1.81681e-58
G00613	transcriptional activator for dhaKLM operon	0	108	647	182	1.81681e-58
G00614	glyoxylate carboligase	0	108	647	182	1.81681e-58
G00615	invasion protein IbeA	0	108	647	182	1.81681e-58
G00616	cytoplasmic protein	10	128	637	162	2.78987e-58
G00617	cryptic 6-phospho-beta-glucosidase	647	183	0	107	8.24019e-58
G00618	hypothetical protein	0	107	647	183	8.24019e-58
G00619	hydroxypyruvate isomerase	0	107	647	183	8.24019e-58
G00620	fimbrial-like adhesin protein	301	0	346	290	1.46144e-57
G00621	hypothetical protein	645	178	2	112	1.6366e-57
G00622	regulatory protein	6	120	641	170	2.08673e-57
G00623	hypothetical protein	25	146	622	144	2.72744e-57
G00624	hypothetical protein	541	81	106	209	3.18399e-57
G00625	hypothetical protein	0	106	647	184	3.72152e-57
G00626	3-oxoacyl-ACP synthase	0	106	647	184	3.72152e-57
G00627	alkylglycerol monooxygenase	0	106	647	184	3.72152e-57
G00628	hypothetical protein	0	106	647	184	3.72152e-57
G00629	ornithine carbamoyltransferase	54	173	593	117	5.59721e-57
G00630	arginine deiminase	54	173	593	117	5.59721e-57
G00631	hypothetical protein	332	5	315	285	6.49495e-57
G00632	C4-dicarboxylate ABC transporter substrate-binding	368	13	279	277	8.04967e-57
G00633	hypothetical protein	6	119	641	171	9.43884e-57
G00634	hypothetical protein	13	130	634	160	1.13318e-56
G00635	coenzyme F390 synthetase	0	105	647	185	1.67368e-56
G00636	hypothetical protein	0	105	647	185	1.67368e-56
G00637	carbamate kinase	54	172	593	118	2.57267e-56
G00638	type VI secretion system protein ImpH	71	185	576	105	2.70534e-56
G00639	antiterminator	47	166	600	124	2.97827e-56
G00640	type VI secretion-associated protein	74	187	573	103	3.35637e-56
G00641	fimbrial-like adhesin protein	92	199	555	91	3.4481e-56
G00642	penicillin G acylase precursor	377	16	270	274	5.05919e-56
G00643	linoleoyl-CoA desaturase	0	104	647	186	7.49556e-56
G00644	hypothetical protein	10	124	637	166	1.16116e-55
G00645	type VI secretion protein	73	185	574	105	2.44669e-55
G00646	peptidoglycan-binding like protein precursor	524	74	123	216	2.46482e-55
G00647	transposase	16	132	631	158	2.69241e-55
G00648	type VI secretion system protein ImpJ	466	47	181	243	4.16526e-55
G00649	suppressor protein	10	123	637	167	5.17463e-55
G00650	hypothetical protein	54	170	593	120	5.3001e-55
G00651	C4-dicarboxylate transport system large permease component	361	13	286	277	7.40121e-55
G00652	C4-dicarboxylate ABC transporter permease	361	13	286	277	7.40121e-55
G00653	CRISPR-associated protein Cas7/Cse4/CasC	517	71	130	219	7.88323e-55
G00654	T3SS structure protein EscR	528	77	119	213	8.11717e-55
G00655	SopA-central-domain-like hexapeptide repeat protein	574	106	73	184	1.12677e-54
G00656	CRISPR-associated protein Cas6/Cse3/CasE	512	69	135	221	1.64706e-54
G00657	hypothetical protein	529	78	118	212	1.79648e-54
G00658	secreted copper-sensitivity suppressor C	10	122	637	168	2.29378e-54
G00659	hexuronate transporter	81	189	566	101	2.655e-54
G00660	DNA-damage-inducible protein DinD	645	183	2	107	2.96169e-54
G00661	hypothetical protein	511	69	136	221	4.99341e-54
G00662	sucrose operon repressor	11	123	636	167	5.00525e-54
G00663	hexapeptide repeat acetyltransferase	613	140	34	150	1.02946e-53
G00664	CRISPR adaptation ssRNA endonuclease	521	75	126	215	1.37342e-53
G00665	transcriptional regulator	519	74	128	216	1.86314e-53
G00666	PTS system sucrose-specific IIBC component	11	122	636	168	2.19947e-53
G00667	hypothetical protein	0	100	647	190	2.89317e-53
G00668	hypothetical protein	0	100	647	190	2.89317e-53
G00669	outer membrane protein	0	100	647	190	2.89317e-53
G00670	PIG-L family deacetylase	0	100	647	190	2.89317e-53
G00671	L-idonate and D-gluconate transporter	153	228	494	62	3.77964e-53
G00672	5-keto-D-gluconate-5-reductase	153	228	494	62	3.77964e-53
G00673	transcriptional repressor	153	228	494	62	3.77964e-53
G00674	type VI secretion protein	75	183	572	107	4.37249e-53
G00675	type VI secretion-associated protein	75	183	572	107	4.37249e-53
G00676	hypothetical protein	81	187	566	103	5.53891e-53
G00677	toxin RelE	6	113	641	177	7.28524e-53
G00678	general secretion pathway protein GspD	128	215	519	75	7.97238e-53
G00679	stress-induced protein	83	188	564	102	9.4256e-53
G00680	hypothetical protein	8	116	639	174	1.4347e-52
G00681	lipopolysaccharide transport system ATP-binding protein	7	114	640	176	2.25545e-52
G00682	transcriptional regulator	15	126	632	164	2.65396e-52
G00683	thermosensitive gluconokinase	154	227	493	63	4.85105e-52
G00684	outer membrane lipoprotein	82	186	565	104	6.89156e-52
G00685	pap operon regulatory protein PapI	15	125	632	165	1.14607e-51
G00686	transposase	506	70	141	220	1.22213e-51
G00687	CRISPR-associated protein CasA/Cse1	506	70	141	220	1.22213e-51
G00688	antitoxin of the YafO-YafN toxin-antitoxin system	104	200	543	90	1.29256e-51
G00689	minor fimbrial subunit	277	0	370	290	2.27451e-51
G00690	L-idonate 5-dehydrogenase	152	225	495	65	3.36178e-51
G00691	general secretion pathway protein GspF	133	215	514	75	5.08936e-51
G00692	general secretion pathway protein GspJ	133	215	514	75	5.08936e-51
G00693	general secretion pathway protein GspI	133	215	514	75	5.08936e-51
G00694	general secretion pathway protein GspB	133	215	514	75	5.08936e-51
G00695	general secretion pathway protein GspH	133	215	514	75	5.08936e-51
G00696	hypothetical protein	297	3	350	287	8.63099e-51
G00697	hypothetical protein	0	96	647	194	1.04655e-50
G00698	hypothetical protein	14	122	633	168	1.23351e-50
G00699	general secretion pathway protein GspC	125	210	522	80	1.59071e-50
G00700	general secretion pathway protein GspE	134	215	513	75	1.63397e-50
G00701	type VI secretion protein ImpK	84	185	563	105	2.2521e-50
G00702	general secretion pathway protein GspA	135	215	512	75	2.73457e-50
G00703	transposase	3	103	644	187	3.03322e-50
G00704	general secretion pathway protein GspG	133	214	514	76	4.16271e-50
G00705	hypothetical protein	1	98	646	192	4.24739e-50
G00706	hypothetical protein	8	112	639	178	4.99645e-50
G00707	type VI secretion protein	82	183	565	107	5.83862e-50
G00708	hypothetical protein	37	147	610	143	5.89206e-50
G00709	general secretion pathway protein GspK	133	213	514	77	1.4229e-49
G00710	leader peptidase HopD	510	75	137	215	1.45892e-49
G00711	general secretion pathway protein GspL	134	213	513	77	2.61337e-49
G00712	mRNA interferase toxin of the YafO-YafN toxin-antitoxin system	104	196	543	94	2.97924e-49
G00713	type VI secretion system protein ImpB	91	187	556	103	1.29218e-48
G00714	general secretion pathway protein GspM	136	213	511	77	1.35683e-48
G00715	hypothetical protein	2	98	645	192	1.64206e-48
G00716	inner membrane protein	527	86	120	204	2.82964e-48
G00717	hypothetical protein	508	76	139	214	3.14683e-48
G00718	type 4 prepilin-like proteins leader peptide processing enzyme	137	213	510	77	4.52007e-48
G00719	periplasmic endochitinase	137	212	510	78	1.57202e-47
G00720	aldolase	324	279	323	11	5.2277e-47
G00721	flagellar filament capping protein	275	2	372	288	9.52576e-47
G00722	hypothetical protein	23	127	624	163	1.05375e-46
G00723	sugar kinase	327	279	320	11	3.24844e-46
G00724	MFS sugar transporter	327	279	320	11	3.24844e-46
G00725	Zn-dependent NAD(P)-binding oxidoreductase	328	279	319	11	7.5314e-46
G00726	MFS sugar transporter	328	279	319	11	7.5314e-46
G00727	metallo-beta-lactamase superfamily protein	1	91	646	199	1.06651e-45
G00728	diguanylate cyclase	0	88	647	202	1.1345e-45
G00729	D-allose ABC transporter ATPase	172	225	475	65	7.01649e-45
G00730	D-allose kinase	172	225	475	65	7.01649e-45
G00731	D-allose ABC transporter permease	172	225	475	65	7.01649e-45
G00732	major pilin protein PapA	15	114	632	176	7.7307e-45
G00733	Zn-dependent NAD(P)-binding oxidoreductase	328	278	319	12	1.21051e-44
G00734	methylglyoxal reductase	328	278	319	12	1.21051e-44
G00735	hypothetical protein	250	0	397	290	1.53212e-44
G00736	glycosyl hydrolase	0	86	647	204	1.98165e-44
G00737	2,3-dihydroxypropane-1-sulphonate exporter	0	86	647	204	1.98165e-44
G00738	D-allose ABC transporter periplasmic binding protein	174	225	473	65	2.86992e-44
G00739	ribose 5-phosphate isomerase B/allose 6-phosphate isomerase	174	225	473	65	2.86992e-44
G00740	hypothetical protein	13	110	634	180	4.43602e-44
G00741	swarming motility protein	620	163	27	127	5.38432e-44
G00742	hypothetical protein	48	147	599	143	7.51289e-44
G00743	adhesin	9	103	638	187	1.89386e-43
G00744	hypothetical protein	5	96	642	194	2.26102e-43
G00745	hypothetical protein	0	84	647	206	3.41031e-43
G00746	hypothetical protein	0	84	647	206	3.41031e-43
G00747	hypothetical protein	7	99	640	191	5.12807e-43
G00748	hypothetical protein	311	12	336	278	6.46499e-43
G00749	D-allose-inducible als operon transcriptional repressor	172	222	475	68	6.69491e-43
G00750	hypothetical protein	0	83	647	207	1.40696e-42
G00751	dihydrodipicolinate synthetase	0	83	647	207	1.40696e-42
G00752	hypothetical protein	0	83	647	207	1.40696e-42
G00753	hypothetical protein	0	83	647	207	1.40696e-42
G00754	C4-dicarboxylate ABC transporter permease	0	83	647	207	1.40696e-42
G00755	ribokinase	0	83	647	207	1.40696e-42
G00756	regulatory peptide	646	205	1	85	5.3985e-42
G00757	fimbrial-like adhesin protein	0	82	647	208	5.78342e-42
G00758	hypothetical protein	353	24	294	266	8.18546e-42
G00759	transcriptional regulator	324	274	323	16	1.091e-41
G00760	type VI secretion protein	111	188	536	102	1.18528e-41
G00761	integrase	16	110	631	180	1.22694e-41
G00762	hypothetical protein	0	81	647	209	2.36871e-41
G00763	transcriptional regulator	11	102	636	188	5.28417e-41
G00764	hypothetical protein	11	102	636	188	5.28417e-41
G00765	hypothetical protein	0	80	647	210	9.6666e-41
G00766	hypothetical protein	10	100	637	190	1.04797e-40
G00767	hypothetical protein	306	13	341	277	1.25459e-40
G00768	hypothetical protein	43	137	604	153	1.3405e-40
G00769	type VI secretion system protein ImpC	113	187	534	103	2.2552e-40
G00770	hypothetical protein	3	87	644	203	2.48504e-40
G00771	transposase	102	180	545	110	3.32872e-40
G00772	transcriptional regulator	646	208	1	82	3.64653e-40
G00773	hypothetical protein	1	82	646	208	3.64653e-40
G00774	acetyltransferase	1	82	646	208	3.64653e-40
G00775	type VI secretion protein	0	79	647	211	3.93078e-40
G00776	hypothetical protein	0	79	647	211	3.93078e-40
G00777	hypothetical protein	252	3	395	287	6.38198e-40
G00778	type III secretion apparatus protein OrgA/MxiK	482	76	165	214	8.93154e-40
G00779	outer membrane usher protein FimD	0	78	647	212	1.59271e-39
G00780	fimbrial protein	0	78	647	212	1.59271e-39
G00781	transposase	150	206	497	84	1.68214e-39
G00782	transposase	58	147	589	143	4.91455e-39
G00783	outer membrane protein	0	77	647	213	6.43065e-39
G00784	fimbrial protein	0	77	647	213	6.43065e-39
G00785	hypothetical protein	0	77	647	213	6.43065e-39
G00786	fimbrial-like adhesin protein	0	77	647	213	6.43065e-39
G00787	type I fimbrial chaperone	0	77	647	213	6.43065e-39
G00788	hypothetical protein	240	2	407	288	1.26814e-38
G00789	type VI secretion system effector Hcp1 family protein	21	111	626	179	1.37175e-38
G00790	hypothetical protein	518	97	129	193	2.06978e-38
G00791	RNA-splicing ligase	647	214	0	76	2.58728e-38
G00792	thioesterase	11	97	636	193	4.78462e-38
G00793	fimbrial-like adhesin protein	220	0	427	290	8.73037e-38
G00794	fimbrial-like adhesin protein	220	0	427	290	8.73037e-38
G00795	2-carboxybenzaldehyde reductase	0	75	647	215	1.03732e-37
G00796	4-hydroxybenzoate decarboxylase	512	96	135	194	3.44397e-37
G00797	hypothetical protein	0	74	647	216	4.14448e-37
G00798	transposase	9	92	638	198	6.82915e-37
G00799	phenylacrylic acid decarboxylase	510	96	137	194	1.4557e-36
G00800	hypothetical protein	0	73	647	217	1.65015e-36
G00801	Amidohydrolase	0	73	647	217	1.65015e-36
G00802	potassium transporter	0	73	647	217	1.65015e-36
G00803	2-carboxybenzaldehyde reductase	0	73	647	217	1.65015e-36
G00804	hypothetical membrane protein	37	124	610	166	2.12605e-36
G00805	site-specific recombinase	532	109	115	181	4.0081e-36
G00806	hypothetical protein	0	72	647	218	6.54762e-36
G00807	YcfA-like protein	0	72	647	218	6.54762e-36
G00808	antitoxin for the HicAB toxin-antitoxin system	0	72	647	218	6.54762e-36
G00809	transcriptional regulator	0	72	647	218	6.54762e-36
G00810	heat shock protein Hsp31	0	72	647	218	6.54762e-36
G00811	ribose 5-phosphate isomerase	441	64	206	226	9.31834e-36
G00812	NAD-dependent dehydratase	1	74	646	216	2.34074e-35
G00813	Carboxymuconolactone decarboxylase family	1	74	646	216	2.34074e-35
G00814	autoinducer-2 (AI-2) modifying protein LsrG	1	74	646	216	2.34074e-35
G00815	hypothetical protein	0	71	647	219	2.58915e-35
G00816	replication protein	13	95	634	195	3.07299e-35
G00817	hypothetical protein	71	150	576	140	4.10414e-35
G00818	autotransporter protein	6	84	641	206	4.11348e-35
G00819	hypothetical protein	643	210	4	80	6.14388e-35
G00820	hypothetical protein	514	101	133	189	6.7076e-35
G00821	hypothetical protein	6	83	641	207	1.5734e-34
G00822	transcriptional regulator	512	101	135	189	2.79568e-34
G00823	hypothetical protein	0	69	647	221	4.00757e-34
G00824	transcriptional regulator	511	101	136	189	4.44385e-34
G00825	conjugal transfer protein	11	90	636	200	5.35109e-34
G00826	type 1 fimbriae Regulatory protein fimB	3	76	644	214	8.7848e-34
G00827	H-NS family DNA-binding protein	25	107	622	183	9.24362e-34
G00828	hypothetical protein	330	27	317	263	1.01758e-33
G00829	hydrolase	364	38	283	252	1.12588e-33
G00830	hypothetical protein	510	101	137	189	1.13787e-33
G00831	hypothetical protein	0	68	647	222	1.56873e-33
G00832	hypothetical protein	201	0	446	290	1.7951e-33
G00833	sugar transporter subunit	200	0	447	290	2.08247e-33
G00834	esterase	200	0	447	290	2.08247e-33
G00835	hypothetical protein	274	13	373	277	2.95588e-33
G00836	maltose transporter subunit	199	0	448	290	3.89836e-33
G00837	CDP-diglyceride synthase	612	174	35	116	4.57114e-33
G00838	inner membrane protein	612	174	35	116	4.57114e-33
G00839	hypothetical protein	0	67	647	223	6.12015e-33
G00840	hypothetical protein	0	67	647	223	6.12015e-33
G00841	autotransporter	163	201	484	89	7.28028e-33
G00842	glycosidase	197	0	450	290	9.27882e-33
G00843	hypothetical protein	3	74	644	216	1.29327e-32
G00844	hypothetical protein	8	83	639	207	1.32478e-32
G00845	conjugal transfer protein	36	116	611	174	1.50698e-32
G00846	alpha-D-mannosidase	196	0	451	290	1.72923e-32
G00847	zinc-dependent metallopeptidase	0	66	647	224	2.37976e-32
G00848	D-serine deaminase activator	161	199	486	91	3.18356e-32
G00849	hypothetical protein	195	0	452	290	3.52508e-32
G00850	glucosamine acetyltransferase	195	0	452	290	3.52508e-32
G00851	hypothetical protein	194	0	453	290	4.09799e-32
G00852	hypothetical protein	68	142	579	148	4.215e-32
G00853	pilus assembly protein PilV	26	105	621	185	4.52294e-32
G00854	hypothetical protein	8	82	639	208	4.92304e-32
G00855	acetyltransferase	318	26	329	264	5.80311e-32
G00856	sucrose-6-phosphate hydrolase	486	92	161	198	9.06425e-32
G00857	sucrose operon repressor	486	92	161	198	9.06425e-32
G00858	hypothetical protein	0	65	647	225	9.22288e-32
G00859	integrase	158	196	489	94	1.55643e-31
G00860	conjugal transfer protein TrbA	47	124	600	166	1.68284e-31
G00861	hypothetical protein	191	0	456	290	1.79423e-31
G00862	sugar transporter subunit	191	0	456	290	1.79423e-31
G00863	endo-alpha-sialidase	4	74	643	216	1.89707e-31
G00864	exported protein	10	84	637	206	1.9859e-31
G00865	fructokinase	485	92	162	198	2.36786e-31
G00866	copy number control protein CopB	16	92	631	198	2.55247e-31
G00867	hypothetical protein	1	67	646	223	3.11066e-31
G00868	sucrose transport protein	484	92	163	198	3.11912e-31
G00869	hypothetical protein	0	64	647	226	3.56264e-31
G00870	lipopolysaccharide transport system ATP-binding protein	6	77	641	213	4.48966e-31
G00871	N-acetyl neuramic acid synthetase NeuB	5	75	642	215	6.05013e-31
G00872	integrase	260	12	387	278	6.32147e-31
G00873	IS609 transposase	1	66	646	224	1.19051e-30
G00874	histidine kinase-like protein	186	0	461	290	2.83489e-30
G00875	transcriptional regulator	186	0	461	290	2.83489e-30
G00876	hypothetical protein	161	195	486	95	3.62012e-30
G00877	phage excisionase	470	87	177	203	3.9531e-30
G00878	adhesin	17	91	630	199	4.40023e-30
G00879	hypothetical protein	0	62	647	228	5.26418e-30
G00880	type 1 fimbriae Regulatory protein fimB	2	67	645	223	8.01857e-30
G00881	hypothetical protein	4	71	643	219	9.96918e-30
G00882	hypothetical protein	3	69	644	221	1.00334e-29
G00883	hypothetical protein	165	196	482	94	1.43048e-29
G00884	cell invasion type III effector protein	17	90	630	200	1.54017e-29
G00885	transcriptional regulator	17	90	630	200	1.54017e-29
G00886	hypothetical protein	243	10	404	280	2.1563e-29
G00887	hypothetical protein	19	92	628	198	2.60216e-29
G00888	type IV pilin-like protein	32	106	615	184	2.61491e-29
G00889	hypothetical protein	182	0	465	290	2.62186e-29
G00890	hypothetical protein	182	0	465	290	2.62186e-29
G00891	hypothetical protein	136	180	511	110	2.84415e-29
G00892	replication protein	87	150	560	140	3.08808e-29
G00893	metal-dependent hydrolase	180	0	467	290	5.02962e-29
G00894	SycD-like chaperone family TPR-repeat-containing protein	17	89	630	201	5.3613e-29
G00895	hypothetical protein	24	97	623	193	6.0903e-29
G00896	IS609 transposase	1	63	646	227	6.53439e-29
G00897	hypothetical protein	254	13	393	277	6.69999e-29
G00898	hypothetical protein	0	60	647	230	7.67841e-29
G00899	hypothetical protein	0	60	647	230	7.67841e-29
G00900	invasin	0	60	647	230	7.67841e-29
G00901	hypothetical protein	0	60	647	230	7.67841e-29
G00902	hypothetical protein	6	73	641	217	8.26643e-29
G00903	hypothetical protein	225	7	422	283	8.72899e-29
G00904	hypothetical protein	443	77	204	213	9.18675e-29
G00905	outer membrane usher protein FimD	278	19	369	271	9.31437e-29
G00906	fimbrial chaperone protein precursor	278	19	369	271	9.31437e-29
G00907	fimbrial major protein precursor	278	19	369	271	9.31437e-29
G00908	hypothetical protein	3	67	644	223	1.39748e-28
G00909	fimbrial adhesin protein	277	19	370	271	1.93934e-28
G00910	hypothetical protein	7	74	640	216	1.96432e-28
G00911	hypothetical protein	177	0	470	290	2.08991e-28
G00912	hypothetical protein	454	288	193	2	2.32834e-28
G00913	hypothetical protein	9	77	638	213	2.34123e-28
G00914	hypothetical protein	29	101	618	189	2.85398e-28
G00915	phage tail sheath protein	0	59	647	231	2.91846e-28
G00916	fimbrial protein	0	59	647	231	2.91846e-28
G00917	outer membrane usher protein	0	59	647	231	2.91846e-28
G00918	hypothetical protein	6	72	641	218	3.01143e-28
G00919	hypothetical protein	16	86	631	204	4.75866e-28
G00920	TetR family transcriptional regulator	3	66	644	224	5.18469e-28
G00921	type III cell invasion protein SipB	17	87	630	203	6.38962e-28
G00922	phage tail fiber assembly protein	600	173	47	117	6.69699e-28
G00923	fimbrial protein	0	58	647	232	1.10574e-27
G00924	hypothetical protein	0	58	647	232	1.10574e-27
G00925	type VI secretion system protein	2	63	645	227	1.58016e-27
G00926	hypothetical protein	173	0	474	290	1.80047e-27
G00927	hypothetical lipoprotein	13	81	634	209	1.91961e-27
G00928	Von Willebrand factor domain lipoprotein	127	171	520	119	2.37491e-27
G00929	H-NS-like DNA-binding protein	25	95	622	195	2.53819e-27
G00930	integrase	0	57	647	233	4.1762e-27
G00931	hypothetical protein	0	57	647	233	4.1762e-27
G00932	hypothetical protein	0	57	647	233	4.1762e-27
G00933	hypothetical protein	16	84	631	206	5.60662e-27
G00934	toxin of the RelE-RelB toxin-antitoxin system	2	62	645	228	5.86549e-27
G00935	membrane protein	3	64	644	226	7.05247e-27
G00936	T3SS secreted effector IpaH	24	93	623	197	7.67214e-27
G00937	ATP-dependent DNA helicase	114	162	533	128	1.01072e-26
G00938	DNA processing chain A	114	162	533	128	1.01072e-26
G00939	zinc-dependent metallopeptidase	9	74	638	216	1.04735e-26
G00940	antitoxin of the RelE-RelB toxin-antitoxin syste	252	15	395	275	1.1873e-26
G00941	type VI secretion system protein	1	59	646	231	1.29805e-26
G00942	hemin receptor	108	158	539	132	1.40327e-26
G00943	hypothetical protein	0	56	647	234	1.57232e-26
G00944	hypothetical protein	41	109	606	181	1.61253e-26
G00945	hypothetical protein	481	100	166	190	2.25361e-26
G00946	hypothetical protein	78	138	569	152	2.41634e-26
G00947	toxin of the RelE-RelB toxin-antitoxin system	251	15	396	275	2.5147e-26
G00948	hypothetical protein	25	93	622	197	2.76168e-26
G00949	hypothetical protein	26	94	621	196	2.95823e-26
G00950	IS600 transposase	166	0	481	290	3.13269e-26
G00951	fimbrial protein	7	70	640	220	3.24563e-26
G00952	transposase	72	133	575	157	4.14279e-26
G00953	hypothetical phage protein	12	77	635	213	5.15613e-26
G00954	stable heat shock chaperone	578	159	69	131	5.25094e-26
G00955	toxic peptide regulated by antisense sRNA symR	197	204	450	86	7.68315e-26
G00956	hypothetical protein	489	105	158	185	8.14506e-26
G00957	hypothetical protein	260	18	387	272	8.6644e-26
G00958	murein peptide degradation regulator	643	226	4	64	8.92365e-26
G00959	transcription regulator	26	93	621	197	9.63619e-26
G00960	cob(I)alamin adenosyltransferase	26	93	621	197	9.63619e-26
G00961	transposase	44	110	603	180	1.05862e-25
G00962	outer membrane porin protein	55	119	592	171	1.92733e-25
G00963	enzyme IIC component of PTS	0	54	647	236	2.20796e-25
G00964	dihydrodipicolinate synthase family protein	0	54	647	236	2.20796e-25
G00965	enzyme IIB component of PTS	0	54	647	236	2.20796e-25
G00966	sialic acid transporter	8	70	639	220	2.36687e-25
G00967	hypothetical protein	107	155	540	135	2.55553e-25
G00968	hypothetical protein	2	59	645	231	2.93375e-25
G00969	acyl-CoA synthetase	27	93	620	197	3.26381e-25
G00970	3-methylaspartate ammonia-lyase	27	93	620	197	3.26381e-25
G00971	fumarate hydratase	27	93	620	197	3.26381e-25
G00972	3-methylaspartate ammonia-lyase	27	93	620	197	3.26381e-25
G00973	glutamate mutase S	27	93	620	197	3.26381e-25
G00974	glutamate mutase L	27	93	620	197	3.26381e-25
G00975	transport protein	27	93	620	197	3.26381e-25
G00976	glutamate mutase E	27	93	620	197	3.26381e-25
G00977	ABC transporter	108	155	539	135	3.94834e-25
G00978	transposase	244	15	403	275	4.50958e-25
G00979	plasmid stabilization system	12	75	635	215	6.05436e-25
G00980	outer membrane protein	0	53	647	237	8.23559e-25
G00981	Phosphoglycerate dehydrogenase	0	53	647	237	8.23559e-25
G00982	PTS fructose transporter subunit IID	0	53	647	237	8.23559e-25
G00983	hypothetical protein	0	53	647	237	8.23559e-25
G00984	PTS mannose transporter subunit IIA	0	53	647	237	8.23559e-25
G00985	hypothetical protein	159	0	488	290	9.10789e-25
G00986	xylanase	619	197	28	93	1.07447e-24
G00987	hypothetical protein	29	94	618	196	1.08694e-24
G00988	plasmid stabilisation system protein	14	77	633	213	1.31259e-24
G00989	transcriptional regulator	9	70	638	220	1.55337e-24
G00990	NADP Isocitrate dehydrogenase	35	99	612	191	2.7721e-24
G00991	N-acetylmannosamine kinase	8	68	639	222	2.87711e-24
G00992	N-acetylneuraminic acid outer membrane channel protein NanC	8	68	639	222	2.87711e-24
G00993	hypothetical protein	0	52	647	238	3.0624e-24
G00994	glycerol kinase	0	52	647	238	3.0624e-24
G00995	glyoxylate/hydroxypyruvate reductase B	0	52	647	238	3.0624e-24
G00996	demethylmenaquinone methyltransferase	0	52	647	238	3.0624e-24
G00997	oxidoreductase	0	52	647	238	3.0624e-24
G00998	ribose ABC transporter permease component	0	52	647	238	3.0624e-24
G00999	ribose ABC transporter substrate binding component	0	52	647	238	3.0624e-24
G01000	transketolase	0	52	647	238	3.0624e-24
G01001	fructokinase	0	52	647	238	3.0624e-24
G01002	GntR family transcriptional regulator	0	52	647	238	3.0624e-24
G01003	ribose ABC transporter ATP-binding component	0	52	647	238	3.0624e-24
G01004	transcriptional regulator	0	52	647	238	3.0624e-24
G01005	transketolase	0	52	647	238	3.0624e-24
G01006	hypothetical protein	26	90	621	200	3.21001e-24
G01007	hypothetical protein	11	72	636	218	4.46961e-24
G01008	hypothetical protein	11	72	636	218	4.46961e-24
G01009	hypothetical protein	15	77	632	213	6.0518e-24
G01010	phage regulatory protein CII	421	77	226	213	8.16777e-24
G01011	peptidase S9	8	67	639	223	9.95866e-24
G01012	hypothetical protein	8	67	639	223	9.95866e-24
G01013	sialic acid-inducible nan operon repressor	8	67	639	223	9.95866e-24
G01014	hypothetical protein	26	89	621	201	1.02016e-23
G01015	6-phosphogluconolactonase	621	201	26	89	1.02016e-23
G01016	carbohydrate-specific outer membrane porin	620	200	27	90	1.0564e-23
G01017	membrane protein	618	198	29	92	1.08327e-23
G01018	membrane protein	115	156	532	134	1.25285e-23
G01019	hypothetical protein	3	58	644	232	1.61441e-23
G01020	hypothetical protein	3	58	644	232	1.61441e-23
G01021	hypothetical protein	3	58	644	232	1.61441e-23
G01022	hypothetical protein	3	58	644	232	1.61441e-23
G01023	hypothetical protein	373	58	274	232	1.65548e-23
G01024	ribokinase	117	157	530	133	1.69634e-23
G01025	integrase	484	108	163	182	2.71577e-23
G01026	N-acetylneuraminate lyase	8	66	639	224	3.43032e-23
G01027	hypothetical protein	0	50	647	240	4.19575e-23
G01028	oxidoreductase	0	50	647	240	4.19575e-23
G01029	hypothetical protein	0	50	647	240	4.19575e-23
G01030	hypothetical protein	0	50	647	240	4.19575e-23
G01031	MATE family efflux transporter	11	70	636	220	5.10998e-23
G01032	hypothetical protein	11	70	636	220	5.10998e-23
G01033	polyketide synthase	11	70	636	220	5.10998e-23
G01034	amidase	11	70	636	220	5.10998e-23
G01035	polyketide synthase	11	70	636	220	5.10998e-23
G01036	surfactin family lipopeptide synthetase A	11	70	636	220	5.10998e-23
G01037	malonyl-CoA transacylase	11	70	636	220	5.10998e-23
G01038	acyl-CoA dehydrogenase	11	70	636	220	5.10998e-23
G01039	polyketide synthase	11	70	636	220	5.10998e-23
G01040	polyketide synthase	11	70	636	220	5.10998e-23
G01041	peptide synthetase	11	70	636	220	5.10998e-23
G01042	3-hydroxyacyl-CoA dehydrogenase	11	70	636	220	5.10998e-23
G01043	peptide synthetase	11	70	636	220	5.10998e-23
G01044	type I-F CRISPR-associated protein Csy1	7	64	640	226	5.99586e-23
G01045	hypothetical protein	7	64	640	226	5.99586e-23
G01046	fimbrial adapter PapF precursor	12	71	635	219	7.83582e-23
G01047	LacI family transcriptional repressor	641	228	6	62	9.68606e-23
G01048	phage antirepressor	149	0	498	290	1.00319e-22
G01049	hypothetical protein	307	36	340	254	1.02575e-22
G01050	hypothetical protein	28	89	619	201	1.05351e-22
G01051	PTS system beta-glucoside-specific IIABC component	619	201	28	89	1.05351e-22
G01052	hypothetical protein	104	147	543	143	1.2989e-22
G01053	UDP-N-acetylglucosamine 2-epimerase	5	60	642	230	1.42181e-22
G01054	L-rhamnonate transporter	0	49	647	241	1.54599e-22
G01055	hypothetical protein	14	73	633	217	1.60489e-22
G01056	cytoplasmic protein	117	155	530	135	1.79767e-22
G01057	hypothetical protein	4	58	643	232	1.8511e-22
G01058	repressor protein	4	58	643	232	1.8511e-22
G01059	hypothetical protein	148	0	499	290	1.9866e-22
G01060	IS100 transposase	239	216	408	74	2.23874e-22
G01061	hydrolase	199	198	448	92	2.51428e-22
G01062	9-O-acetyl-N-acetylneuraminic acid deacetylase	163	2	484	288	2.59179e-22
G01063	DNA-binding protein	613	196	34	94	2.64776e-22
G01064	MolR family transcriptional regulator	30	90	617	200	3.19382e-22
G01065	cryptic 6-phospho-beta-glucosidase	618	201	29	89	3.24942e-22
G01066	hypothetical protein	28	88	619	202	3.26298e-22
G01067	Polyketide cyclase / dehydrase and lipid transport	8	64	639	226	4.01073e-22
G01068	D-beta-hydroxybutyrate dehydrogenase	8	64	639	226	4.01073e-22
G01069	methylglyoxal reductase	8	64	639	226	4.01073e-22
G01070	transcriptional activator of xapAB	8	64	639	226	4.01073e-22
G01071	type I-F CRISPR-associated helicase Cas3	8	64	639	226	4.01073e-22
G01072	peptidase S9	8	64	639	226	4.01073e-22
G01073	CRISPR-associated protein Cas1	8	64	639	226	4.01073e-22
G01074	CRISPR-associated protein Csy3	8	64	639	226	4.01073e-22
G01075	hypothetical protein	8	64	639	226	4.01073e-22
G01076	hypothetical protein	47	105	600	185	4.7125e-22
G01077	phage endonuclease RUS	314	244	333	46	5.57589e-22
G01078	transcriptional regulator	20	79	627	211	6.03937e-22
G01079	transporter	502	290	145	0	7.41619e-22
G01080	hypothetical protein	24	83	623	207	8.95251e-22
G01081	transcriptional antiterminator	617	201	30	89	9.76691e-22
G01082	antibiotic efflux protein	27	86	620	204	9.97984e-22
G01083	transcriptional regulator	28	87	619	203	1.00419e-21
G01084	hypothetical protein	10	66	637	224	1.20384e-21
G01085	transcriptional response regulator	10	66	637	224	1.20384e-21
G01086	hypothetical protein	10	66	637	224	1.20384e-21
G01087	hypothetical protein	8	63	639	227	1.3613e-21
G01088	membrane protein	285	31	362	259	1.41544e-21
G01089	hypothetical protein	143	0	504	290	1.45198e-21
G01090	galactoside O-acetyltransferase	475	286	172	4	1.50989e-21
G01091	hypothetical protein	1	50	646	240	1.5722e-21
G01092	hypothetical protein	1	50	646	240	1.5722e-21
G01093	IS609 transposase	628	213	19	77	1.65028e-21
G01094	hypothetical protein	159	2	488	288	1.80001e-21
G01095	hypothetical protein	11	67	636	223	1.89889e-21
G01096	addiction module toxin RelE	20	78	627	212	1.91027e-21
G01097	outer membrane protein	0	47	647	243	2.08006e-21
G01098	hypothetical protein	4	56	643	234	2.28253e-21
G01099	type VI secretion protein	2	52	645	238	2.37399e-21
G01100	hypothetical protein	2	52	645	238	2.37399e-21
G01101	transposase	290	33	357	257	2.8039e-21
G01102	transposase	222	206	425	84	3.61487e-21
G01103	outer membrane protein Lom	150	1	497	289	3.88685e-21
G01104	hypothetical protein	6	59	641	231	3.97859e-21
G01105	peptidase	13	69	634	221	4.06126e-21
G01106	hypothetical protein	1	49	646	241	5.67401e-21
G01107	type I site-specific deoxyribonuclease	45	101	602	189	5.70758e-21
G01108	reverse transcriptase-like protein	89	134	558	156	6.21853e-21
G01109	4'-phosphopantetheinyl transferase	11	66	636	224	6.26948e-21
G01110	ATP-binding protein	0	46	647	244	7.59562e-21
G01111	hypothetical protein	2	51	645	239	8.45833e-21
G01112	IS26 transposase	96	138	551	152	8.7099e-21
G01113	antitoxin of the SohA(PrlF)-YhaV toxin-antitoxin system	644	237	3	53	9.12421e-21
G01114	hypothetical protein	3	53	644	237	9.12421e-21
G01115	toxin RelE	28	85	619	205	9.32906e-21
G01116	hemolysin D	168	4	479	286	1.00948e-20
G01117	toxin of the ChpB-ChpS toxin-antitoxin system	420	83	227	207	1.03388e-20
G01118	frameshift suppressor	46	101	601	189	1.34207e-20
G01119	hypothetical protein	161	3	486	287	1.71207e-20
G01120	L-fuculose-1-phosphate aldolase	35	91	612	199	1.96192e-20
G01121	TetR family transcriptional regulator	322	244	325	46	1.99056e-20
G01122	hypothetical protein	1	48	646	242	2.04076e-20
G01123	flavoprotein	510	290	137	0	2.06339e-20
G01124	membrane fusion protein of a transport system	25	81	622	209	2.73503e-20
G01125	hypothetical protein	25	81	622	209	2.73503e-20
G01126	outer membrane transport protein	25	81	622	209	2.73503e-20
G01127	ABC transporter ATP-binding protein	25	81	622	209	2.73503e-20
G01128	hypothetical protein	25	81	622	209	2.73503e-20
G01129	hypothetical protein	0	45	647	245	2.76543e-20
G01130	hypothetical protein	0	45	647	245	2.76543e-20
G01131	hypothetical protein	0	45	647	245	2.76543e-20
G01132	hypothetical protein	0	45	647	245	2.76543e-20
G01133	phage head protein	7	59	640	231	2.77481e-20
G01134	hypothetical protein	28	84	619	206	2.81597e-20
G01135	hemolysin B	145	1	502	289	2.96646e-20
G01136	hypothetical protein	2	50	645	240	3.00233e-20
G01137	hypothetical protein	2	50	645	240	3.00233e-20
G01138	hypothetical protein	3	52	644	238	3.20171e-20
G01139	epimerase	40	95	607	195	3.30281e-20
G01140	transcriptional regulator	40	95	607	195	3.30281e-20
G01141	hypothetical phage protein	40	95	607	195	3.30281e-20
G01142	GNAT family N-acetyltransferase	40	95	607	195	3.30281e-20
G01143	endoglucanase with Zn-dependent exopeptidase domain	40	95	607	195	3.30281e-20
G01144	transcriptional regulator	40	95	607	195	3.30281e-20
G01145	FAD-dependent oxidoreductase	511	290	136	0	3.76219e-20
G01146	FAD-linked oxidoreductase	511	290	136	0	3.76219e-20
G01147	antiterminator regulatory protein	511	290	136	0	3.76219e-20
G01148	antitoxin of the ChpBS toxin-antitoxin system	420	84	227	206	4.14703e-20
G01149	multidrug DMT transporter permease	38	93	609	197	4.22982e-20
G01150	NADH-binding oxidoreductase	637	227	10	63	4.37781e-20
G01151	hypothetical protein	37	92	610	198	4.72994e-20
G01152	hypothetical protein	8	60	639	230	5.16565e-20
G01153	Nitroreductase family	8	60	639	230	5.16565e-20
G01154	hypothetical protein	576	171	71	119	6.58668e-20
G01155	conjugal transfer protein TraD	25	80	622	210	8.29629e-20
G01156	hypothetical membrane protein	25	80	622	210	8.29629e-20
G01157	integrase	326	244	321	46	8.94824e-20
G01158	fimbrial adapter PapK precursor	12	65	635	225	9.81489e-20
G01159	antitoxin of the RelE-RelB toxin-antitoxin syste	12	65	635	225	9.81489e-20
G01160	minor pilin protein PapH	12	65	635	225	9.81489e-20
G01161	fimbrial protein PapJ	12	65	635	225	9.81489e-20
G01162	outer membrane protein	12	65	635	225	9.81489e-20
G01163	hemolysin A	143	1	504	289	1.04245e-19
G01164	transcriptional regulator	39	93	608	197	1.08623e-19
G01165	serine/threonine kinase	156	3	491	287	1.26509e-19
G01166	hypothetical protein	156	3	491	287	1.26509e-19
G01167	sugar transporter subunit	637	228	10	62	1.43506e-19
G01168	glycosyl hydrolase	637	228	10	62	1.43506e-19
G01169	TIM alpha/beta barrel enzyme	637	228	10	62	1.43506e-19
G01170	phosphotransferase enzyme IIA component	40	94	607	196	1.59865e-19
G01171	PTS system EIIC permease component	40	94	607	196	1.59865e-19
G01172	enzyme IIB component of PTS	40	94	607	196	1.59865e-19
G01173	nucleoside triphosphatase	40	94	607	196	1.59865e-19
G01174	lipopolysaccharide 1,2-N- acetylglucosamine transferase WaaD	287	35	360	255	1.60058e-19
G01175	hypothetical protein	8	59	639	231	1.71839e-19
G01176	hypothetical protein	8	59	639	231	1.71839e-19
G01177	superinfection exclusion protein	43	96	604	194	1.84029e-19
G01178	protein kinase	32	86	615	204	2.1294e-19
G01179	hypothetical protein	193	10	454	280	2.16974e-19
G01180	beta-phosphoglucomutase	636	227	11	63	2.18427e-19
G01181	hypothetical protein	23	77	624	213	2.31161e-19
G01182	shikimate 5-dehydrogenase	5	54	642	236	2.40469e-19
G01183	hypothetical protein	623	212	24	78	2.42364e-19
G01184	hypothetical protein	201	192	446	98	2.83247e-19
G01185	fimbrial protein PapG	9	60	638	230	2.93035e-19
G01186	phage late gene regulator	9	60	638	230	2.93035e-19
G01187	phage baseplate assembly protein	9	60	638	230	2.93035e-19
G01188	phage baseplate assembly protein	9	60	638	230	2.93035e-19
G01189	hypothetical protein	7	57	640	233	3.1229e-19
G01190	hypothetical protein	251	214	396	76	3.33285e-19
G01191	LysR family transcriptional regulator	647	247	0	43	3.63345e-19
G01192	hypothetical protein	0	43	647	247	3.63345e-19
G01193	relaxase	2	48	645	242	3.74015e-19
G01194	transporter	40	93	607	197	3.74693e-19
G01195	lyase/synthase	40	93	607	197	3.74693e-19
G01196	hemolysin C	139	1	508	289	4.12662e-19
G01197	hypothetical protein	13	65	634	225	4.37355e-19
G01198	AAA-like domain	153	3	494	287	4.65897e-19
G01199	hypothetical protein	43	95	604	195	5.13483e-19
G01200	phage tail protein	8	58	639	232	5.68709e-19
G01201	hypothetical protein	8	58	639	232	5.68709e-19
G01202	hypothetical protein	201	191	446	99	6.6099e-19
G01203	hypothetical protein	26	79	621	211	7.57694e-19
G01204	maturase-related protein	26	79	621	211	7.57694e-19
G01205	transcriptional regulator	26	79	621	211	7.57694e-19
G01206	dehydratase	40	92	607	198	9.38216e-19
G01207	phage head protein	9	59	638	231	9.597e-19
G01208	hypothetical protein	9	59	638	231	9.597e-19
G01209	hypothetical protein	9	59	638	231	9.597e-19
G01210	phage prohead protease	9	59	638	231	9.597e-19
G01211	hypothetical protein	9	59	638	231	9.597e-19
G01212	hypothetical protein	9	59	638	231	9.597e-19
G01213	hypothetical protein	9	59	638	231	9.597e-19
G01214	hypothetical protein	9	59	638	231	9.597e-19
G01215	phage tail protein	9	59	638	231	9.597e-19
G01216	alpha amylase catalytic domain family protein	635	227	12	63	1.01214e-18
G01217	sugar ABC transporter permease	635	227	12	63	1.01214e-18
G01218	hypothetical protein	7	56	640	234	1.03987e-18
G01219	hypothetical protein	72	117	575	173	1.09293e-18
G01220	hypothetical protein	0	42	647	248	1.31126e-18
G01221	glycosyltransferase	2	47	645	243	1.3126e-18
G01222	flavoprotein	510	289	137	1	1.35191e-18
G01223	hypothetical protein	137	1	510	289	1.35191e-18
G01224	hypothetical protein	210	15	437	275	1.35295e-18
G01225	Zn-dependent NAD(P)-binding oxidoreductase	634	226	13	64	1.38893e-18
G01226	hypothetical protein	166	173	481	117	1.4156e-18
G01227	type III secretion system lipoprotein precursor EprK	383	72	264	218	1.44275e-18
G01228	enzyme IIB component of PTS	188	10	459	280	1.50968e-18
G01229	transferase	34	86	613	204	1.54151e-18
G01230	conjugal transfer protein TrbF	64	111	583	179	1.61916e-18
G01231	hypothetical protein	21	73	626	217	1.84472e-18
G01232	hypothetical protein	8	57	639	233	1.87246e-18
G01233	Hcp1 family type VI secretion system effector	491	123	156	167	2.42175e-18
G01234	hypothetical protein	5	52	642	238	2.76237e-18
G01235	hypothetical protein	5	52	642	238	2.76237e-18
G01236	enzyme IIB component of PTS	187	10	460	280	2.83732e-18
G01237	enzyme IIC component of PTS	187	10	460	280	2.83732e-18
G01238	transcriptional regulator	187	10	460	280	2.83732e-18
G01239	transferase	187	10	460	280	2.83732e-18
G01240	PTS fructose transporter subunit IID	187	10	460	280	2.83732e-18
G01241	4-hydroxy-2-ketovalerate aldolase	186	10	461	280	3.06578e-18
G01242	hypothetical protein	9	58	638	232	3.12632e-18
G01243	phage baseplate assembly protein	9	58	638	232	3.12632e-18
G01244	hypothetical protein	9	58	638	232	3.12632e-18
G01245	phage portal protein	9	58	638	232	3.12632e-18
G01246	phage DNA packaging protein	9	58	638	232	3.12632e-18
G01247	hypothetical protein	9	58	638	232	3.12632e-18
G01248	phage tarminase large subunit	9	58	638	232	3.12632e-18
G01249	hypothetical protein	1	44	646	246	3.30064e-18
G01250	membrane protein	223	19	424	271	4.30624e-18
G01251	fimbrial protein	647	249	0	41	4.71845e-18
G01252	hypothetical protein	0	41	647	249	4.71845e-18
G01253	CoA-dependent proprionaldehyde dehydrogenase	0	41	647	249	4.71845e-18
G01254	hypothetical protein	0	41	647	249	4.71845e-18
G01255	S-adenosylmethionine synthetase (Methionine adenosyltransferase)	0	41	647	249	4.71845e-18
G01256	pyruvate formate lyase activating enzyme	0	41	647	249	4.71845e-18
G01257	glycine radical domain-containing pyruvate formate-lyase	0	41	647	249	4.71845e-18
G01258	propanediol utilization protein PduB	0	41	647	249	4.71845e-18
G01259	Modification methylase VspI	0	41	647	249	4.71845e-18
G01260	histidine kinase	0	41	647	249	4.71845e-18
G01261	permease	0	41	647	249	4.71845e-18
G01262	DNA-binding response regulator	0	41	647	249	4.71845e-18
G01263	general stress protein	0	41	647	249	4.71845e-18
G01264	hypothetical protein	10	59	637	231	4.89302e-18
G01265	hypothetical protein	10	59	637	231	4.89302e-18
G01266	hypothetical protein	10	59	637	231	4.89302e-18
G01267	hypothetical protein	31	82	616	208	5.56754e-18
G01268	inner membrane protein	182	180	465	110	5.7155e-18
G01269	hypothetical protein	6	53	641	237	5.90888e-18
G01270	hypothetical protein	147	3	500	287	6.17776e-18
G01271	phage tail protein	9	57	638	233	1.01296e-17
G01272	LacI family transcriptional regulator	13	62	634	228	1.37653e-17
G01273	hypothetical protein	19	69	628	221	1.38534e-17
G01274	NAD(P)-dependent oxidoreductase	209	192	438	98	1.51123e-17
G01275	hypothetical protein	10	58	637	232	1.56927e-17
G01276	hypothetical protein	10	58	637	232	1.56927e-17
G01277	hypothetical protein	10	58	637	232	1.56927e-17
G01278	hypothetical protein	10	58	637	232	1.56927e-17
G01279	hypothetical protein	10	58	637	232	1.56927e-17
G01280	phage antitermination protein Q	10	58	637	232	1.56927e-17
G01281	hypothetical protein	10	58	637	232	1.56927e-17
G01282	hypothetical protein	10	58	637	232	1.56927e-17
G01283	C4-dicarboxylate ABC transporter permease	0	40	647	250	1.69298e-17
G01284	C4-dicarboxylate-binding periplasmic protein	0	40	647	250	1.69298e-17
G01285	gluconate 5-dehydrogenase	0	40	647	250	1.69298e-17
G01286	demethylmenaquinone methyltransferase	0	40	647	250	1.69298e-17
G01287	type IV secretion protein Rhs	0	40	647	250	1.69298e-17
G01288	C4-dicarboxylate ABC transporter	0	40	647	250	1.69298e-17
G01289	hydrolase	0	40	647	250	1.69298e-17
G01290	truncated altronate dehydratase	0	40	647	250	1.69298e-17
G01291	alcohol dehydrogenase	0	40	647	250	1.69298e-17
G01292	transcriptional regulator	0	40	647	250	1.69298e-17
G01293	hypothetical protein	0	40	647	250	1.69298e-17
G01294	hypothetical protein	0	40	647	250	1.69298e-17
G01295	conjugal transfer protein TraR	78	118	569	172	1.91555e-17
G01296	type III secretion protein EivG	25	75	622	215	1.93261e-17
G01297	hypothetical protein	255	212	392	78	2.20207e-17
G01298	hypothetical protein	144	3	503	287	2.22497e-17
G01299	hypothetical protein	144	3	503	287	2.22497e-17
G01300	mRNA interferase toxin of the HicAB toxin-antitoxin system	386	76	261	214	2.58989e-17
G01301	outer membrane protease VII	176	9	471	281	2.95948e-17
G01302	hypothetical protein	5	50	642	240	3.11436e-17
G01303	hypothetical protein	642	240	5	50	3.11436e-17
G01304	PIG-L family deacetylase	613	207	34	83	3.55671e-17
G01305	mobilization protein	57	102	590	188	3.89759e-17
G01306	translation initiation factor subunit protein	33	82	614	208	3.89899e-17
G01307	O-antigen ligase	264	32	383	258	4.14461e-17
G01308	hypothetical protein	10	57	637	233	5.0048e-17
G01309	MFS sugar transporter	511	288	136	2	5.50212e-17
G01310	ferredoxin	511	288	136	2	5.50212e-17
G01311	hypothetical protein	0	39	647	251	6.05695e-17
G01312	hypothetical protein	0	39	647	251	6.05695e-17
G01313	hypothetical protein	0	39	647	251	6.05695e-17
G01314	hypothetical protein	0	39	647	251	6.05695e-17
G01315	hypothetical protein	0	39	647	251	6.05695e-17
G01316	hypothetical protein	0	39	647	251	6.05695e-17
G01317	hypothetical protein	0	39	647	251	6.05695e-17
G01318	integrase	0	39	647	251	6.05695e-17
G01319	hypothetical protein	0	39	647	251	6.05695e-17
G01320	hypothetical protein	0	39	647	251	6.05695e-17
G01321	toxin of the SohB(PrlF)-YhaV toxin-antitoxin system	639	236	8	54	6.47564e-17
G01322	phage baseplate protein	8	54	639	236	6.47564e-17
G01323	hypothetical protein	201	186	446	104	8.85034e-17
G01324	DNA primase	163	7	484	283	1.06277e-16
G01325	propionate kinase/acetate kinase C	1	41	646	249	1.44413e-16
G01326	hypothetical protein	1	41	646	249	1.44413e-16
G01327	propanediol utilization protein PduN	1	41	646	249	1.44413e-16
G01328	hypothetical protein	1	41	646	249	1.44413e-16
G01329	propanediol utilization protein	1	41	646	249	1.44413e-16
G01330	propanol dehydrogenase	1	41	646	249	1.44413e-16
G01331	hypothetical protein	1	41	646	249	1.44413e-16
G01332	type I restriction endonuclease	4	47	643	243	1.49469e-16
G01333	hypothetical protein	10	56	637	234	1.58715e-16
G01334	hypothetical protein	125	1	522	289	2.1597e-16
G01335	exported protein	0	38	647	252	2.16079e-16
G01336	hypothetical protein	0	38	647	252	2.16079e-16
G01337	hypothetical protein	0	38	647	252	2.16079e-16
G01338	hypothetical protein	0	38	647	252	2.16079e-16
G01339	hypothetical protein	0	38	647	252	2.16079e-16
G01340	hypothetical protein	0	38	647	252	2.16079e-16
G01341	hypothetical protein	0	38	647	252	2.16079e-16
G01342	glycosyl transferase	0	38	647	252	2.16079e-16
G01343	hypothetical protein	37	84	610	206	2.18585e-16
G01344	molecular chaperone	40	87	607	203	2.36344e-16
G01345	adhesin	16	63	631	227	2.51552e-16
G01346	RNA-binding protein	134	150	513	140	2.92815e-16
G01347	hypothetical phage protein	373	73	274	217	3.41349e-16
G01348	N-acylneuraminate cytidylyltransferase	5	48	642	242	3.44478e-16
G01349	hypothetical protein	131	2	516	288	3.69679e-16
G01350	S- and N-oxide reductase subunit A	640	239	7	51	3.94305e-16
G01351	hypothetical protein	7	51	640	239	3.94305e-16
G01352	transcriptional activator of the bfp operon PerA	13	59	634	231	4.10765e-16
G01353	anti-repressor protein	27	74	620	216	4.51423e-16
G01354	hypothetical protein	165	8	482	282	4.79695e-16
G01355	transport protein	643	244	4	46	5.01146e-16
G01356	lipoprotein	1	40	646	250	5.05383e-16
G01357	hypothetical protein	1	40	646	250	5.05383e-16
G01358	ethanolamine utilization protein EutJ	1	40	646	250	5.05383e-16
G01359	Shiga toxin 2 subunit B	115	0	532	290	5.59847e-16
G01360	flagellar protein FliD	94	125	553	165	5.84609e-16
G01361	hypothetical protein	3	44	644	246	6.34281e-16
G01362	phage baseplate component	6	49	641	241	6.97414e-16
G01363	oxidoreductase membrane subunit	647	253	0	37	7.68662e-16
G01364	periplasmic pilin chaperone	0	37	647	253	7.68662e-16
G01365	fimbrial protein	0	37	647	253	7.68662e-16
G01366	colicin immunity protein	122	142	525	148	7.81963e-16
G01367	phage murein endopeptidase	123	1	524	289	7.97684e-16
G01368	Shiga toxin 2 subunit A	113	0	534	290	9.775e-16
G01369	transport protein	25	71	622	219	1.34231e-15
G01370	phosphotransferase system enzyme IIC	25	71	622	219	1.34231e-15
G01371	phosphosugar isomerase	25	71	622	219	1.34231e-15
G01372	hypothetical protein	172	10	475	280	1.4393e-15
G01373	hypothetical protein	172	10	475	280	1.4393e-15
G01374	phage injection protein	37	82	610	208	1.5342e-15
G01375	transcriptional regulator/aminotransferase	582	186	65	104	1.73439e-15
G01376	hypothetical protein	1	39	646	251	1.76252e-15
G01377	outer membrane protease VII	347	243	300	47	1.85395e-15
G01378	sugar-binding protein	485	127	162	163	2.07535e-15
G01379	S- and N-oxide reductase subunit A	639	239	8	51	2.13344e-15
G01380	hypothetical protein	8	51	639	239	2.13344e-15
G01381	conjugal transfer protein	35	80	612	210	2.17697e-15
G01382	hypothetical protein	127	2	520	288	2.29721e-15
G01383	diguanylate cyclase	647	254	0	36	2.72663e-15
G01384	hypothetical protein	0	36	647	254	2.72663e-15
G01385	hypothetical protein	0	36	647	254	2.72663e-15
G01386	hypothetical protein	28	73	619	217	3.43662e-15
G01387	ATP-binding component of sugar ABC transporter	493	132	154	158	3.72249e-15
G01388	ribose 5-phosphate isomerase B/allose 6-phosphate isomerase	25	70	622	220	3.80924e-15
G01389	transcriptional repressor of the aga regulon	25	70	622	220	3.80924e-15
G01390	3-oxoacyl-[acyl-carrier-protein] reductase	25	70	622	220	3.80924e-15
G01391	galactitol-specific enzyme IIA component of PTS	25	70	622	220	3.80924e-15
G01392	enzyme IIB component of PTS	25	70	622	220	3.80924e-15
G01393	regulatory protein	7	49	640	241	4.08693e-15
G01394	regulatory protein	7	49	640	241	4.08693e-15
G01395	transporter protein	7	49	640	241	4.08693e-15
G01396	permease	483	127	164	163	5.01804e-15
G01397	permease	483	127	164	163	5.01804e-15
G01398	hypothetical protein	1	38	646	252	6.12545e-15
G01399	hypothetical protein	1	38	646	252	6.12545e-15
G01400	ABC transporter ATPase	11	54	636	236	6.81389e-15
G01401	methyltransferase	3	42	644	248	7.21195e-15
G01402	transposase	185	14	462	276	7.44481e-15
G01403	hypothetical protein	90	120	557	170	7.89785e-15
G01404	hypothetical protein	530	289	117	1	9.01513e-15
G01405	fimbrial-like adhesin protein	313	53	334	237	9.37438e-15
G01406	hypothetical protein	0	35	647	255	9.64479e-15
G01407	transposase	0	35	647	255	9.64479e-15
G01408	hypothetical protein	0	35	647	255	9.64479e-15
G01409	hypothetical protein	0	35	647	255	9.64479e-15
G01410	hypothetical protein	482	127	165	163	9.88545e-15
G01411	hexuronate transporter	20	64	627	226	9.93839e-15
G01412	glucosidase	20	64	627	226	9.93839e-15
G01413	galactitol-specific enzyme IIA component of PTS	26	70	621	220	1.0451e-14
G01414	D-ribulose-5-phosphate 3-epimerase	25	69	622	221	1.07347e-14
G01415	type III secreted effector SopA	22	66	625	224	1.07354e-14
G01416	hypothetical protein	5	45	642	245	1.22147e-14
G01417	Unsaturated rhamnogalacturonyl hydrolase YesR	4	43	643	247	1.83672e-14
G01418	Oligogalacturonate-specific porin KdgM precursor	4	43	643	247	1.83672e-14
G01419	C4-dicarboxylate ABC transporter substrate-binding	4	43	643	247	1.83672e-14
G01420	dTDP-4-deoxyrhamnose-3,5-epimerase	152	155	495	135	2.10694e-14
G01421	ATP-dependent DNA helicase	646	253	1	37	2.12142e-14
G01422	phosphoglycerate activator protein	8	49	639	241	2.13231e-14
G01423	hypothetical protein	8	49	639	241	2.13231e-14
G01424	MbeB-like, N-term conserved region	17	60	630	230	2.24964e-14
G01425	relaxase	3	41	644	249	2.41585e-14
G01426	major facilitator family transporter	3	41	644	249	2.41585e-14
G01427	ATP-binding protein	3	41	644	249	2.41585e-14
G01428	lipoprotein	29	72	618	218	2.47736e-14
G01429	exonuclease	580	187	67	103	2.59547e-14
G01430	PTS system EIIC permease component	27	70	620	220	2.78885e-14
G01431	fimbrial protein	41	83	606	207	2.90498e-14
G01432	hypothetical protein	0	34	647	256	3.40205e-14
G01433	hypothetical protein	0	34	647	256	3.40205e-14
G01434	hypothetical protein	0	34	647	256	3.40205e-14
G01435	hypothetical protein	0	34	647	256	3.40205e-14
G01436	hypothetical protein	504	284	143	6	5.58648e-14
G01437	C4-dicarboxylate transport system large permease component	4	42	643	248	6.04311e-14
G01438	C4-dicarboxylate ABC transporter permease	4	42	643	248	6.04311e-14
G01439	fimbrial chaperone	39	80	608	210	6.05386e-14
G01440	glycosyl transferase family protein	6	45	641	245	7.58009e-14
G01441	methyltransferase	3	40	644	250	8.05642e-14
G01442	SDR family oxidoreductase	500	283	147	7	8.25934e-14
G01443	hypothetical protein	12	53	635	237	8.30547e-14
G01444	haemolysin expression modulating protein	88	116	559	174	8.48652e-14
G01445	hypothetical protein	130	141	517	149	8.73477e-14
G01446	phage replication protein	355	242	292	48	9.16961e-14
G01447	hypothetical protein	119	2	528	288	9.53086e-14
G01448	PagC-like membrane protein	111	1	536	289	1.0108e-13
G01449	hypothetical protein	0	33	647	257	1.19667e-13
G01450	hypothetical protein	139	146	508	144	1.21161e-13
G01451	cytoplasmic membrane lipoprotein-28	642	247	5	43	1.28546e-13
G01452	Pentapeptide repeats (8 copies)	10	50	637	240	1.42777e-13
G01453	sor-operon regulator	29	70	618	220	1.83641e-13
G01454	integrase	28	69	619	221	1.9736e-13
G01455	phage head DNA stabilization protein	27	68	620	222	2.10008e-13
G01456	transposase	43	82	604	208	2.1002e-13
G01457	hypothetical protein	215	184	432	106	2.25399e-13
G01458	integrase	128	4	519	286	2.39926e-13
G01459	outer membrane protein	100	0	547	290	2.45456e-13
G01460	EamA-like transporter family	9	48	638	242	3.09566e-13
G01461	phage regulatory protein	115	2	532	288	3.11241e-13
G01462	siderophore biosynthesis protein	68	101	579	189	3.25109e-13
G01463	siderophore biosynthesis protein	68	101	579	189	3.25109e-13
G01464	fimbrial-like adhesin protein	316	58	331	232	3.89449e-13
G01465	fimbrial-like adhesin protein	316	58	331	232	3.89449e-13
G01466	Modification methylase FokI	0	32	647	258	4.19763e-13
G01467	hypothetical protein	15	55	632	235	4.3322e-13
G01468	hypothetical protein	10	49	637	241	4.34285e-13
G01469	transposase	186	17	461	273	4.7431e-13
G01470	hypothetical protein	81	109	566	181	5.53168e-13
G01471	IS609 transposase	30	70	617	220	6.31936e-13
G01472	fructuronate transporter	599	205	48	85	6.38886e-13
G01473	phage tail fiber protein	4	40	643	250	6.44622e-13
G01474	hypothetical protein	4	40	643	250	6.44622e-13
G01475	hypothetical phage protein	8	46	639	244	6.45148e-13
G01476	carbohydrate-specific outer membrane porin	511	148	136	142	6.63421e-13
G01477	TetR family transcriptional regulator	165	12	482	278	7.18295e-13
G01478	outer membrane pore protein	126	4	521	286	7.37146e-13
G01479	hypothetical protein	212	181	435	109	7.4815e-13
G01480	permease	212	181	435	109	7.4815e-13
G01481	N-acetylneuraminic acid mutarotase	6	43	641	247	7.65081e-13
G01482	hypothetical protein	235	31	412	259	8.01368e-13
G01483	hypothetical protein	1	34	646	256	8.62794e-13
G01484	hypothetical protein	1	34	646	256	8.62794e-13
G01485	Reverse transcriptase (RNA-dependent DNA polymerase)	1	34	646	256	8.62794e-13
G01486	antirestriction protein	2	36	645	254	1.0092e-12
G01487	hypothetical protein	2	36	645	254	1.0092e-12
G01488	integrase	2	36	645	254	1.0092e-12
G01489	hypothetical protein	2	36	645	254	1.0092e-12
G01490	relaxase	2	36	645	254	1.0092e-12
G01491	transposase	257	201	390	89	1.07984e-12
G01492	hypothetical protein	105	1	542	289	1.12635e-12
G01493	hypothetical protein	5	41	642	249	1.32478e-12
G01494	hypothetical protein	5	41	642	249	1.32478e-12
G01495	siderophore biosynthesis protein	68	99	579	191	1.3593e-12
G01496	ferric siderophore receptor	68	99	579	191	1.3593e-12
G01497	UDP-D-galactose:(glucosyl)lipopolysaccharide- alpha-1,3-D-galactosyltransferase	217	26	430	264	1.4144e-12
G01498	hypothetical protein	172	14	475	276	1.45651e-12
G01499	general stress protein	647	259	0	31	1.46836e-12
G01500	hypothetical protein	0	31	647	259	1.46836e-12
G01501	transcriptional repressor	0	31	647	259	1.46836e-12
G01502	transmembrane protein	0	31	647	259	1.46836e-12
G01503	type VI secretion system protein	0	31	647	259	1.46836e-12
G01504	hypothetical protein	591	200	56	90	1.52222e-12
G01505	hypothetical protein	25	64	622	226	1.71372e-12
G01506	hypothetical protein	278	46	369	244	1.9692e-12
G01507	purine-nucleoside phosphorylase	369	244	278	46	1.9692e-12
G01508	lipopolysaccharide core biosynthesis protein WaaY	235	32	412	258	2.03241e-12
G01509	membranetransport protein	69	99	578	191	2.12191e-12
G01510	6-phospho-beta-glucosidase A	512	150	135	140	2.12916e-12
G01511	transcriptional regulator	212	180	435	110	2.31124e-12
G01512	hypothetical protein	94	0	553	290	2.82176e-12
G01513	hypothetical protein	95	0	552	290	2.90855e-12
G01514	hypothetical protein	1	33	646	257	2.94602e-12
G01515	siderophore biosynthesis protein	68	98	579	192	2.95295e-12
G01516	hypothetical protein	153	10	494	280	3.2769e-12
G01517	hypothetical protein	2	35	645	255	3.3767e-12
G01518	dTDP-glucose 4,6-dehydratase	269	205	378	85	3.50055e-12
G01519	hypothetical protein	217	27	430	263	3.62498e-12
G01520	transcriptional activator of xapAB	371	244	276	46	3.65187e-12
G01521	hypothetical protein	156	11	491	279	3.71818e-12
G01522	hypothetical protein	102	1	545	289	3.75158e-12
G01523	phage tail fiber protein	115	3	532	287	4.2958e-12
G01524	Rz-like protein	409	99	238	191	4.96305e-12
G01525	hypothetical protein	23	61	624	229	4.97799e-12
G01526	ferric enterochelin esterase	20	58	627	232	5.03391e-12
G01527	ABC transporter ATP-binding protein	20	58	627	232	5.03391e-12
G01528	phage tail fiber assembly protein	21	59	626	231	5.08929e-12
G01529	AraC family transcriptional regulator	0	30	647	260	5.12232e-12
G01530	hypothetical protein	0	30	647	260	5.12232e-12
G01531	L	0	30	647	260	5.12232e-12
G01532	hypothetical protein	0	30	647	260	5.12232e-12
G01533	hypothetical protein	0	30	647	260	5.12232e-12
G01534	hypothetical protein	0	30	647	260	5.12232e-12
G01535	beta-carotene 15,15'-monooxygenase	0	30	647	260	5.12232e-12
G01536	hypothetical protein	0	30	647	260	5.12232e-12
G01537	manganese transport protein	0	30	647	260	5.12232e-12
G01538	hypothetical protein	0	30	647	260	5.12232e-12
G01539	chaperone	0	30	647	260	5.12232e-12
G01540	hypothetical protein	0	30	647	260	5.12232e-12
G01541	hypothetical protein	0	30	647	260	5.12232e-12
G01542	hypothetical protein	245	36	402	254	5.97362e-12
G01543	PTS system cellobiose-specific IIC component	507	148	140	142	6.01964e-12
G01544	hypothetical protein	310	221	337	69	6.35795e-12
G01545	hypothetical protein	66	96	581	194	6.41229e-12
G01546	phage minor tail protein	101	1	546	289	6.77991e-12
G01547	hypothetical protein	297	54	350	236	7.25074e-12
G01548	outer membrane protein	370	243	277	47	7.45159e-12
G01549	hypothetical protein	149	146	498	144	9.0388e-12
G01550	GntR family transcriptional regulator	509	150	138	140	9.35445e-12
G01551	hypothetical protein	3	36	644	254	9.51534e-12
G01552	regulatory protein	250	38	397	252	9.75953e-12
G01553	hypothetical protein	1	32	646	258	1.00228e-11
G01554	transcriptional regulator	1	32	646	258	1.00228e-11
G01555	hypothetical protein	1	32	646	258	1.00228e-11
G01556	hypothetical protein	244	36	403	254	1.02364e-11
G01557	phage tail component	36	72	611	218	1.06588e-11
G01558	transmembrane protein	29	66	618	224	1.07065e-11
G01559	hypothetical protein	10	46	637	244	1.17618e-11
G01560	phage holin protein	181	18	466	272	1.3209e-11
G01561	dTDP-rhamnosyl transferase	5	39	642	251	1.33604e-11
G01562	RpoS stabilzer during Mg starvation	28	65	619	225	1.35044e-11
G01563	PTS system cellobiose-specific IIA component	504	148	143	142	1.64234e-11
G01564	hypothetical protein	0	29	647	261	1.78202e-11
G01565	hypothetical protein	0	29	647	261	1.78202e-11
G01566	hypothetical protein	0	29	647	261	1.78202e-11
G01567	hypothetical protein	0	29	647	261	1.78202e-11
G01568	hypothetical protein	0	29	647	261	1.78202e-11
G01569	fimbrial-like adhesin protein	0	29	647	261	1.78202e-11
G01570	fimbrial-like adhesin protein	0	29	647	261	1.78202e-11
G01571	outer membrane protein	0	29	647	261	1.78202e-11
G01572	fimbrial-like adhesin protein	0	29	647	261	1.78202e-11
G01573	fimbrial protein PapE	8	43	639	247	1.84859e-11
G01574	hypothetical protein	12	48	635	242	1.87963e-11
G01575	UvrD/REP helicase-like protein	105	2	542	288	1.96309e-11
G01576	hypothetical protein	106	2	541	288	2.02893e-11
G01577	hypothetical protein	9	44	638	246	2.60859e-11
G01578	lipopolysaccharide core biosynthesis protein WaaY	302	216	345	74	2.86717e-11
G01579	replication protein	247	38	400	252	2.91228e-11
G01580	hypothetical protein	26	62	621	228	3.08806e-11
G01581	DNA adenine methylase	240	36	407	254	3.19009e-11
G01582	transcriptional regulator	240	36	407	254	3.19009e-11
G01583	plasmid stabilization protein ParE	1	31	646	259	3.39749e-11
G01584	hypothetical protein	1	31	646	259	3.39749e-11
G01585	histidine kinase	1	31	646	259	3.39749e-11
G01586	DNA methylase	1	31	646	259	3.39749e-11
G01587	adhesin	104	2	543	288	3.44085e-11
G01588	AraC-family transcriptional regulator	104	2	543	288	3.44085e-11
G01589	DNA-binding protein	10	45	637	245	3.48593e-11
G01590	hypothetical protein	22	58	625	232	3.72151e-11
G01591	Salmochelin siderophore protein IroE	22	58	625	232	3.72151e-11
G01592	transcriptional regulator	2	33	645	257	3.73192e-11
G01593	hypothetical protein	7	41	640	249	3.76541e-11
G01594	hypothetical protein	7	41	640	249	3.76541e-11
G01595	hypothetical protein	21	57	626	233	3.78085e-11
G01596	glucosyl-transferase	20	56	627	234	3.78643e-11
G01597	hypothetical protein	272	47	375	243	4.01497e-11
G01598	integrase	175	17	472	273	4.08471e-11
G01599	hypothetical protein	96	1	551	289	4.14093e-11
G01600	phage minor tail protein	121	5	526	285	4.16145e-11
G01601	phage minor tail protein	121	5	526	285	4.16145e-11
G01602	hypothetical protein	121	5	526	285	4.16145e-11
G01603	lipoprotein	591	204	56	86	5.40137e-11
G01604	hypothetical protein	88	0	559	290	5.87739e-11
G01605	hypothetical protein	0	28	647	262	6.18265e-11
G01606	hypothetical protein	0	28	647	262	6.18265e-11
G01607	dual role activator/repressor for lldPRD operon	0	28	647	262	6.18265e-11
G01608	integrase	0	28	647	262	6.18265e-11
G01609	reverse transcriptase	0	28	647	262	6.18265e-11
G01610	periplasmic pilin chaperone	0	28	647	262	6.18265e-11
G01611	outer membrane usher protein FimD	0	28	647	262	6.18265e-11
G01612	F1C minor fimbrial subunit F precursor	0	28	647	262	6.18265e-11
G01613	S fimbriae minor subunit SfaD	0	28	647	262	6.18265e-11
G01614	lipoprotein	522	284	125	6	6.39663e-11
G01615	hypothetical protein	103	2	544	288	6.40272e-11
G01616	EptAB family phosphoethanolamine transferase	544	288	103	2	6.40272e-11
G01617	hypothetical protein	4	36	643	254	6.8992e-11
G01618	hypothetical protein	6	39	641	251	7.27814e-11
G01619	hypothetical protein	14	49	633	241	7.38473e-11
G01620	hypothetical protein	46	78	601	212	7.4628e-11
G01621	hypothetical protein	9	43	638	247	7.77643e-11
G01622	phage major tail protein	109	3	538	287	7.98112e-11
G01623	hypothetical protein	10	44	637	246	1.02616e-10
G01624	hypothetical protein	101	2	546	288	1.10696e-10
G01625	transposase	134	8	513	282	1.12756e-10
G01626	hypothetical protein	1	30	646	260	1.14741e-10
G01627	hypothetical protein	1	30	646	260	1.14741e-10
G01628	conjugal transfer protein TraS	194	166	453	124	1.22151e-10
G01629	xanthosine transporter	366	239	281	51	1.22752e-10
G01630	hypothetical protein	2	32	645	258	1.23252e-10
G01631	phage tail sheath protein	38	71	609	219	1.26812e-10
G01632	hypothetical protein	5	37	642	253	1.31739e-10
G01633	phage holin protein	48	79	599	211	1.32677e-10
G01634	DNA breaking-rejoining protein	119	5	528	285	1.35278e-10
G01635	membrane protein	119	5	528	285	1.35278e-10
G01636	phage terminase small subunit	119	5	528	285	1.35278e-10
G01637	transcriptional regulator	93	1	554	289	1.37161e-10
G01638	hypothetical protein	8	41	639	249	1.67687e-10
G01639	transposase	146	11	501	279	1.85765e-10
G01640	hypothetical protein	429	113	218	177	1.87946e-10
G01641	hypothetical protein	288	54	359	236	1.903e-10
G01642	tellurium resistance protein TerF	99	2	548	288	2.09902e-10
G01643	Type I restriction enzyme R protein N terminus (HSDR_N)	0	27	647	263	2.13925e-10
G01644	hypothetical protein	0	27	647	263	2.13925e-10
G01645	hypothetical protein	0	27	647	263	2.13925e-10
G01646	hypothetical protein	4	35	643	255	2.18966e-10
G01647	two-component system OmpR family response regulator	4	35	643	255	2.18966e-10
G01648	hypothetical protein	4	35	643	255	2.18966e-10
G01649	hypothetical protein	45	76	602	214	2.21105e-10
G01650	phage terminase large subunit	117	5	530	285	2.2783e-10
G01651	hypothetical protein	50	80	597	210	2.48302e-10
G01652	phage endopeptidase Rz	50	80	597	210	2.48302e-10
G01653	hypothetical protein	50	80	597	210	2.48302e-10
G01654	hypothetical protein	50	80	597	210	2.48302e-10
G01655	hypothetical protein	16	50	631	240	2.48319e-10
G01656	ferrienterobactin outer membrane transporter	23	57	624	233	2.54524e-10
G01657	Zn-dependent NAD(P)-binding oxidoreductase	637	247	10	43	2.99981e-10
G01658	transcriptional regulator	83	0	564	290	3.15279e-10
G01659	integrase	145	11	502	279	3.28854e-10
G01660	hypothetical protein	7	39	640	251	3.47285e-10
G01661	hypothetical protein	153	13	494	277	3.76562e-10
G01662	propanediol utilization protein PduA	159	147	488	143	3.78066e-10
G01663	hypothetical protein	51	80	596	210	3.8684e-10
G01664	hypothetical protein	51	80	596	210	3.8684e-10
G01665	phage tarminase small subunit	51	80	596	210	3.8684e-10
G01666	hypothetical protein	51	80	596	210	3.8684e-10
G01667	phage head-tail connector protein	51	80	596	210	3.8684e-10
G01668	phage DNA packaging protein	51	80	596	210	3.8684e-10
G01669	hypothetical protein	51	80	596	210	3.8684e-10
G01670	T3SS secretion switching protein SepL	91	1	556	289	4.16544e-10
G01671	hypothetical protein	29	62	618	228	4.17872e-10
G01672	hypothetical protein	104	3	543	287	4.24607e-10
G01673	phage antiterminator	254	43	393	247	4.31344e-10
G01674	phage replication protein	368	238	279	52	4.48878e-10
G01675	hypothetical protein	449	124	198	166	4.95045e-10
G01676	MbeD/MobD like	52	81	595	209	4.9555e-10
G01677	hypothetical protein	8	40	639	250	5.00052e-10
G01678	hypothetical protein	13	46	634	244	5.18538e-10
G01679	membrane protein	50	79	597	211	5.24126e-10
G01680	PTS system glucose-specific IIBC components	14	47	633	243	5.83003e-10
G01681	N-acetylmannosamine-6-phosphate 2-epimerase	14	47	633	243	5.83003e-10
G01682	transcription regulator	120	6	527	284	6.01232e-10
G01683	hypothetical protein	120	6	527	284	6.01232e-10
G01684	hypothetical protein	33	65	614	225	6.5209e-10
G01685	hypothetical protein	33	65	614	225	6.5209e-10
G01686	multidrug resistance protein	350	231	297	59	6.56228e-10
G01687	hypothetical protein	550	179	97	111	6.57158e-10
G01688	cytochrome o ubiquinol oxidase	155	14	492	276	6.57853e-10
G01689	replication protein	9	41	638	249	6.77131e-10
G01690	anaerobic C4-dicarboxylate transporter	0	26	647	264	7.38202e-10
G01691	anaerobic C4-dicarboxylate transporter DcuB	0	26	647	264	7.38202e-10
G01692	phage DNA primase	252	43	395	247	7.45637e-10
G01693	addiction module toxin RelE	89	1	558	289	7.54817e-10
G01694	tellurium resistance protein TerW	103	3	544	287	7.69589e-10
G01695	ATP synthase	103	3	544	287	7.69589e-10
G01696	tellurium resistance protein TerC	103	3	544	287	7.69589e-10
G01697	tellurium resistance protein TerB	103	3	544	287	7.69589e-10
G01698	hypothetical protein	103	3	544	287	7.69589e-10
G01699	hypothetical protein	103	3	544	287	7.69589e-10
G01700	tellurium resistance protein TerA	103	3	544	287	7.69589e-10
G01701	tellurium resistance protein TerE	103	3	544	287	7.69589e-10
G01702	tellurium resistance protein TerD	103	3	544	287	7.69589e-10
G01703	hypothetical protein	376	91	271	199	7.77929e-10
G01704	hypothetical protein	102	3	545	287	7.89996e-10
G01705	hypothetical protein	51	79	596	211	8.65689e-10
G01706	hypothetical protein	51	79	596	211	8.65689e-10
G01707	hypothetical protein	137	10	510	280	8.84555e-10
G01708	phage excisionase	137	10	510	280	8.84555e-10
G01709	phosphotriesterase	191	162	456	128	9.52707e-10
G01710	hypothetical protein	52	80	595	210	9.65451e-10
G01711	AlpA family transcriptional regulator	52	80	595	210	9.65451e-10
G01712	transcriptional repressor	52	80	595	210	9.65451e-10
G01713	phage tail assembly protein	233	37	414	253	9.86826e-10
G01714	hypothetical protein	169	18	478	272	1.01235e-09
G01715	hypothetical protein	80	0	567	290	1.02719e-09
G01716	ribonucleoside hydrolase 2	3	32	644	258	1.03987e-09
G01717	transcriptional repressor	3	32	644	258	1.03987e-09
G01718	transport protein	3	32	644	258	1.03987e-09
G01719	IS1400 transposase	62	87	585	203	1.07978e-09
G01720	T3SS structure protein EscR	95	2	552	288	1.13486e-09
G01721	peptidase T	1	28	646	262	1.294e-09
G01722	hypothetical protein	1	28	646	262	1.294e-09
G01723	hypothetical protein	1	28	646	262	1.294e-09
G01724	hypothetical protein	1	28	646	262	1.294e-09
G01725	transporter	1	28	646	262	1.294e-09
G01726	histidine kinase	1	28	646	262	1.294e-09
G01727	hypothetical protein	1	28	646	262	1.294e-09
G01728	type VI secretion system protein	1	28	646	262	1.294e-09
G01729	transcriptional regulator	88	1	559	289	1.32084e-09
G01730	tellurium resistance protein TerZ	101	3	546	287	1.33484e-09
G01731	phage replication protein	53	80	594	210	1.41584e-09
G01732	hypothetical protein	53	80	594	210	1.41584e-09
G01733	phage endolysin	53	80	594	210	1.41584e-09
G01734	integrase	53	80	594	210	1.41584e-09
G01735	hypothetical protein	53	80	594	210	1.41584e-09
G01736	hypothetical protein	26	58	621	232	1.54431e-09
G01737	hypothetical protein	186	23	461	267	1.61103e-09
G01738	transcriptional regulator	14	46	633	244	1.61959e-09
G01739	hypothetical phage protein	34	65	613	225	1.73289e-09
G01740	hypothetical phage protein	34	65	613	225	1.73289e-09
G01741	hypothetical phage protein	34	65	613	225	1.73289e-09
G01742	IS2 transposase	322	219	325	71	1.9183e-09
G01743	T3SS secreted effector	20	52	627	238	1.95331e-09
G01744	hypothetical protein	335	224	312	66	2.15431e-09
G01745	hypothetical protein	4	33	643	257	2.16877e-09
G01746	hypothetical protein	4	33	643	257	2.16877e-09
G01747	hypothetical protein	4	33	643	257	2.16877e-09
G01748	hypothetical protein	4	33	643	257	2.16877e-09
G01749	hypothetical protein	4	33	643	257	2.16877e-09
G01750	transcriptional activator	133	130	514	160	2.19205e-09
G01751	hypothetical protein	100	3	547	287	2.3744e-09
G01752	hypothetical protein	175	20	472	270	2.39945e-09
G01753	type III secretion protein EivE	24	56	623	234	2.40348e-09
G01754	hypothetical protein	86	1	561	289	2.44632e-09
G01755	hypothetical protein	87	1	560	289	2.45361e-09
G01756	type I site-specific deoxyribonuclease	0	25	647	265	2.54053e-09
G01757	hypothetical protein	0	25	647	265	2.54053e-09
G01758	type I restriction-modification enzyme M subunit	0	25	647	265	2.54053e-09
G01759	F1C fimbrial adhesin precursor	0	25	647	265	2.54053e-09
G01760	hypothetical protein	0	25	647	265	2.54053e-09
G01761	hypothetical protein	30	61	617	229	2.69726e-09
G01762	hypothetical protein	230	37	417	253	2.7339e-09
G01763	putative Peptidoglycan domain	224	35	423	255	2.77297e-09
G01764	hypothetical protein	245	42	402	248	2.85937e-09
G01765	type III secretion protein	51	78	596	212	2.86321e-09
G01766	hypothetical protein	53	79	594	211	3.07737e-09
G01767	lipopolysaccharide 1,2-glucosyltransferase WaaR	180	22	467	268	3.29205e-09
G01768	5-keto-D-gluconate-5-reductase	3	31	644	259	3.31903e-09
G01769	Mg(2 ) transport ATPase	3	31	644	259	3.31903e-09
G01770	hypothetical protein	352	230	295	60	3.33588e-09
G01771	fimbrial-like adhesin protein	78	0	569	290	3.49803e-09
G01772	hypothetical protein	34	64	613	226	3.87918e-09
G01773	hypothetical protein	5	34	642	256	3.90154e-09
G01774	transporter	5	34	642	256	3.90154e-09
G01775	hypothetical protein	98	3	549	287	4.17566e-09
G01776	T3SS chaperone CesT	98	3	549	287	4.17566e-09
G01777	T3SS secreted effector NleH	85	1	562	289	4.18952e-09
G01778	phage regulatory protein	1	27	646	263	4.32057e-09
G01779	regulatory protein	1	27	646	263	4.32057e-09
G01780	isoaspartyl peptidase	1	27	646	263	4.32057e-09
G01781	type I restriction enzyme S subunit	1	27	646	263	4.32057e-09
G01782	peptidase	1	27	646	263	4.32057e-09
G01783	hypothetical protein	119	7	528	283	4.33766e-09
G01784	hypothetical protein	120	7	527	283	4.44092e-09
G01785	ypothetical protein	354	84	293	206	5.69273e-09
G01786	hypothetical protein	76	0	571	290	5.83648e-09
G01787	hypothetical protein	4	32	643	258	6.76619e-09
G01788	hypothetical protein	4	32	643	258	6.76619e-09
G01789	DNA transfer protein	4	32	643	258	6.76619e-09
G01790	integrase	4	32	643	258	6.76619e-09
G01791	phage DNA repair protein	4	32	643	258	6.76619e-09
G01792	hypothetical protein	4	32	643	258	6.76619e-09
G01793	hypothetical protein	4	32	643	258	6.76619e-09
G01794	hypothetical protein	171	20	476	270	6.78156e-09
G01795	phage terminase large subunit	227	37	420	253	7.47835e-09
G01796	transcriptional regulator PchE	29	59	618	231	7.77707e-09
G01797	hypothetical protein	83	1	564	289	7.91577e-09
G01798	hypothetical protein	0	24	647	266	8.71993e-09
G01799	hypothetical protein	0	24	647	266	8.71993e-09
G01800	hypothetical protein	0	24	647	266	8.71993e-09
G01801	hypothetical protein	0	24	647	266	8.71993e-09
G01802	hypothetical protein	0	24	647	266	8.71993e-09
G01803	type I restriction-modification enzyme M subunit	0	24	647	266	8.71993e-09
G01804	hypothetical protein	0	24	647	266	8.71993e-09
G01805	hypothetical protein	0	24	647	266	8.71993e-09
G01806	cystathione beta-lyase	7	36	640	254	9.25637e-09
G01807	hypothetical protein	7	36	640	254	9.25637e-09
G01808	DeoR family transcriptional regulator	621	234	26	56	9.28329e-09
G01809	transporter	621	234	26	56	9.28329e-09
G01810	hypothetical protein	229	38	418	252	9.65104e-09
G01811	DNA-binding protein	210	32	437	258	1.04065e-08
G01812	hypothetical protein	3	30	644	260	1.05363e-08
G01813	hypothetical phage protein	38	66	609	224	1.0999e-08
G01814	T3SS secreted effector NleB	74	0	573	290	1.10002e-08
G01815	hypothetical protein	74	0	573	290	1.10002e-08
G01816	regulator Mpc	90	2	557	288	1.12162e-08
G01817	AidA-I family adhesin	107	5	540	285	1.15748e-08
G01818	hypothetical protein	5	33	642	257	1.19214e-08
G01819	phage portal protein	226	37	421	253	1.21356e-08
G01820	hypothetical protein	166	19	481	271	1.23725e-08
G01821	transcriptional regulator	116	7	531	283	1.30072e-08
G01822	endonuclease	82	1	565	289	1.32888e-08
G01823	hypothetical protein	82	1	565	289	1.32888e-08
G01824	GTP-binding protein	82	1	565	289	1.32888e-08
G01825	hypothetical protein	96	3	551	287	1.34592e-08
G01826	PTS system cellobiose-specific IIB component	484	146	163	144	1.41889e-08
G01827	hemolysin C	134	11	513	279	1.4218e-08
G01828	hypothetical phage protein	1	26	646	264	1.43694e-08
G01829	hypothetical protein	1	26	646	264	1.43694e-08
G01830	hypothetical protein	27	57	620	233	1.46134e-08
G01831	fimbrial protein	582	204	65	86	1.62235e-08
G01832	hypothetical protein	9	38	638	252	1.64942e-08
G01833	hypothetical protein	73	0	574	290	1.86591e-08
G01834	hypothetical protein	73	0	574	290	1.86591e-08
G01835	T3SS secreted effector EspL	73	0	574	290	1.86591e-08
G01836	T3SS translocator EspA	88	2	559	288	1.93164e-08
G01837	GNAT family N-acetyltransferase	48	73	599	217	2.07651e-08
G01838	hypothetical protein	4	31	643	259	2.09825e-08
G01839	positive regulator of P2 growth	211	33	436	257	2.17859e-08
G01840	T3SS component	94	3	553	287	2.23106e-08
G01841	dehydrogenase	621	235	26	55	2.2863e-08
G01842	hypothetical protein	621	235	26	55	2.2863e-08
G01843	hypothetical protein	202	163	445	127	2.31009e-08
G01844	transcriptional activator	81	1	566	289	2.34847e-08
G01845	phage ecombination protein Bet	358	230	289	60	2.46642e-08
G01846	hypothetical protein	221	172	426	118	2.58734e-08
G01847	hypothetical protein	102	109	545	181	2.66489e-08
G01848	hypothetical protein	140	13	507	277	2.77218e-08
G01849	IS609 transposase	497	154	150	136	2.8031e-08
G01850	hypothetical protein	397	105	250	185	2.88757e-08
G01851	conjugal transfer protein TrbF	191	27	456	263	2.90161e-08
G01852	hypothetical protein	0	23	647	267	2.98503e-08
G01853	phage DNA replication protein	0	23	647	267	2.98503e-08
G01854	hypothetical protein	0	23	647	267	2.98503e-08
G01855	3-oxoacyl-(acyl carrier protein) synthase	0	23	647	267	2.98503e-08
G01856	hypothetical protein	0	23	647	267	2.98503e-08
G01857	hypothetical protein	0	23	647	267	2.98503e-08
G01858	integrase	0	23	647	267	2.98503e-08
G01859	hypothetical protein	0	23	647	267	2.98503e-08
G01860	transcriptional regulator	0	23	647	267	2.98503e-08
G01861	hypothetical protein	0	23	647	267	2.98503e-08
G01862	magnesium/nickel/cobalt transporter CorA	0	23	647	267	2.98503e-08
G01863	phage P2 GpU family protein	27	56	620	234	2.98755e-08
G01864	phage morphogeneis protein	27	56	620	234	2.98755e-08
G01865	partitioning protein ParA	103	109	544	181	3.2467e-08
G01866	phage DNA-binding protein	3	29	644	261	3.32614e-08
G01867	hypothetical protein	3	29	644	261	3.32614e-08
G01868	hypothetical protein	3	29	644	261	3.32614e-08
G01869	hypothetical protein	3	29	644	261	3.32614e-08
G01870	Cupin domain	3	29	644	261	3.32614e-08
G01871	diguanylate phosphodiesterase	3	29	644	261	3.32614e-08
G01872	hypothetical protein	222	37	425	253	3.42455e-08
G01873	phage DNA-binding protein	20	49	627	241	3.45336e-08
G01874	phage antirepressor	41	67	606	223	3.50646e-08
G01875	ABC transporter ATPase component	19	48	628	242	3.57019e-08
G01876	hypothetical protein	5	32	642	258	3.61897e-08
G01877	hypothetical protein	5	32	642	258	3.61897e-08
G01878	T3SS component	98	4	549	286	3.88295e-08
G01879	T3SS component	93	3	554	287	4.03637e-08
G01880	outer membrane protein OmpA	80	1	567	289	4.40415e-08
G01881	hypothetical protein	80	1	567	289	4.40415e-08
G01882	phage scaffold protein	40	66	607	224	4.47812e-08
G01883	phage head DNA stabilization protein	40	66	607	224	4.47812e-08
G01884	phage portal protein	40	66	607	224	4.47812e-08
G01885	hypothetical protein	2	27	645	263	4.51792e-08
G01886	lipoprotein	2	27	645	263	4.51792e-08
G01887	transposase	76	92	571	198	4.58729e-08
G01888	transcriptional regulator	297	205	350	85	4.61096e-08
G01889	lipopolysaccharide biosynthesis O-acetyl transferase	1	25	646	265	4.75987e-08
G01890	hypothetical protein	1	25	646	265	4.75987e-08
G01891	hypothetical protein	28	56	619	234	5.07389e-08
G01892	hypothetical protein	28	56	619	234	5.07389e-08
G01893	phage DNA packaging protein	87	99	560	191	5.29533e-08
G01894	hypothetical protein	6	33	641	257	5.60308e-08
G01895	integrase	209	33	438	257	5.61559e-08
G01896	hypothetical protein	70	0	577	290	5.99115e-08
G01897	lipid A myristoyl transferase MsbB2	70	0	577	290	5.99115e-08
G01898	hypothetical protein	102	5	545	285	6.04938e-08
G01899	hypothetical protein	364	231	283	59	6.06872e-08
G01900	endonuclease	25	53	622	237	6.30216e-08
G01901	Type IV pilus biogenesis	71	0	576	290	6.39546e-08
G01902	outer membrane protein	71	0	576	290	6.39546e-08
G01903	hypothetical protein	71	0	576	290	6.39546e-08
G01904	RpoS stabilzer during Mg starvation	71	0	576	290	6.39546e-08
G01905	LPS -1,7-N-acetylglucosamine transferase Ecf2	71	0	576	290	6.39546e-08
G01906	polysaccharide deacetylase Ecf1	71	0	576	290	6.39546e-08
G01907	Type IV leader peptidase family	71	0	576	290	6.39546e-08
G01908	outer membrane porin protein	86	2	561	288	6.41506e-08
G01909	hypothetical protein	4	30	643	260	6.46656e-08
G01910	hypothetical protein	232	41	415	249	7.53188e-08
G01911	hypothetical protein	172	146	475	144	7.67251e-08
G01912	integrase	7	34	640	256	7.97413e-08
G01913	conjugal transfer protein TraH	266	191	381	99	8.6365e-08
G01914	endopeptidase	36	62	611	228	8.84223e-08
G01915	plasmid stable inheritance protein StbB	103	108	544	182	9.56924e-08
G01916	hypothetical protein	40	65	607	225	9.87195e-08
G01917	phage minor tail protein	29	56	618	234	9.9203e-08
G01918	hypothetical protein	29	56	618	234	9.9203e-08
G01919	hypothetical protein	29	56	618	234	9.9203e-08
G01920	hypothetical protein	29	56	618	234	9.9203e-08
G01921	phage baseplate assembly protein	29	56	618	234	9.9203e-08
G01922	hypothetical protein	29	56	618	234	9.9203e-08
G01923	phage head morphogenesis protein	29	56	618	234	9.9203e-08
G01924	hypothetical protein	29	56	618	234	9.9203e-08
G01925	hypothetical protein	29	56	618	234	9.9203e-08
G01926	integrase	29	56	618	234	9.9203e-08
G01927	hypothetical protein	29	56	618	234	9.9203e-08
G01928	hypothetical protein	0	22	647	268	1.01914e-07
G01929	hypothetical protein	0	22	647	268	1.01914e-07
G01930	Sulfatase	0	22	647	268	1.01914e-07
G01931	hypothetical protein	0	22	647	268	1.01914e-07
G01932	hypothetical protein	0	22	647	268	1.01914e-07
G01933	glucitol/sorbitol-specific enzyme IIC component of PTS	0	22	647	268	1.01914e-07
G01934	NADH-binding oxidoreductase	0	22	647	268	1.01914e-07
G01935	3-keto-L-gulonate 6-phosphate decarboxylase	0	22	647	268	1.01914e-07
G01936	phosphosugar isomerase	0	22	647	268	1.01914e-07
G01937	glucose-6-phosphate isomerase	0	22	647	268	1.01914e-07
G01938	PTS system IIB component / IIC component	0	22	647	268	1.01914e-07
G01939	hypothetical protein	0	22	647	268	1.01914e-07
G01940	hypothetical protein	0	22	647	268	1.01914e-07
G01941	hypothetical protein	0	22	647	268	1.01914e-07
G01942	hypothetical protein	0	22	647	268	1.01914e-07
G01943	hypothetical protein	0	22	647	268	1.01914e-07
G01944	hypothetical protein	0	22	647	268	1.01914e-07
G01945	hypothetical protein	0	22	647	268	1.01914e-07
G01946	hypothetical protein	0	22	647	268	1.01914e-07
G01947	hypothetical protein	0	22	647	268	1.01914e-07
G01948	RNA-directed DNA polymerase	0	22	647	268	1.01914e-07
G01949	hypothetical protein	0	22	647	268	1.01914e-07
G01950	coproporphyrinogen III oxidase	0	22	647	268	1.01914e-07
G01951	hypothetical protein	0	22	647	268	1.01914e-07
G01952	pyridoxal phosphate phosphatase	0	22	647	268	1.01914e-07
G01953	glucitol/sorbitol-specific enzyme IIB component of PTS	0	22	647	268	1.01914e-07
G01954	hypothetical protein	0	22	647	268	1.01914e-07
G01955	positive regulator GrlA	84	2	563	288	1.042e-07
G01956	Oligogalacturonate lyase	3	28	644	262	1.04399e-07
G01957	2,3-dihydroxypropane-1-sulphonate exporter	3	28	644	262	1.04399e-07
G01958	type I restriction enzyme R subunit	3	28	644	262	1.04399e-07
G01959	membrane protein	124	10	523	280	1.06717e-07
G01960	T3SS secreted effector EspG	95	4	552	286	1.17201e-07
G01961	phage regulatory protein	28	55	619	235	1.17397e-07
G01962	hypothetical protein	28	55	619	235	1.17397e-07
G01963	phage major capsid protein	215	36	432	254	1.18208e-07
G01964	hypothetical protein	89	3	558	287	1.23857e-07
G01965	regulator for DicB	144	15	503	275	1.24002e-07
G01966	hypothetical protein	173	146	474	144	1.28136e-07
G01967	hypothetical phage protein	43	67	604	223	1.30663e-07
G01968	phage host-nuclease inhibitor protein Gam	358	228	289	62	1.30909e-07
G01969	hypothetical protein	55	76	592	214	1.31124e-07
G01970	type III secretion apparatus protein EivI	55	76	592	214	1.31124e-07
G01971	hypothetical protein	77	1	570	289	1.32946e-07
G01972	T3SS secreted effector OspB	76	1	571	289	1.33494e-07
G01973	hypothetical protein	218	37	429	253	1.41584e-07
G01974	hypothetical protein	250	48	397	242	1.5575e-07
G01975	hypothetical protein	1	24	646	266	1.57026e-07
G01976	PLP-dependent transferase	1	24	646	266	1.57026e-07
G01977	phage DNA replication protein	6	32	641	258	1.6562e-07
G01978	T3SS intimin	99	5	548	285	1.80542e-07
G01979	T3SS structure protein SepQ	99	5	548	285	1.80542e-07
G01980	T3SS structure protein EscD	99	5	548	285	1.80542e-07
G01981	T3SS structure protein EscC	99	5	548	285	1.80542e-07
G01982	T3SS structure protein EscV	99	5	548	285	1.80542e-07
G01983	T3SS structure protein EscJ	99	5	548	285	1.80542e-07
G01984	T3SS structure protein EscS	99	5	548	285	1.80542e-07
G01985	T3SS secretion switching protein SepD	99	5	548	285	1.80542e-07
G01986	T3SS structure protein EscN	99	5	548	285	1.80542e-07
G01987	alcohol dehydrogenase	580	290	67	0	1.93058e-07
G01988	hypothetical protein	68	0	579	290	1.93349e-07
G01989	hypothetical protein	192	155	455	135	1.97687e-07
G01990	T3SS chaperone CesD	94	4	553	286	2.00794e-07
G01991	T3SS component	88	3	559	287	2.0587e-07
G01992	hypothetical protein	75	1	572	289	2.25685e-07
G01993	phage tail tube protein	217	37	430	253	2.29928e-07
G01994	hypothetical protein	7	33	640	257	2.31451e-07
G01995	hypothetical protein	7	33	640	257	2.31451e-07
G01996	iron-regulated outer membrane virulence protein	14	41	633	249	2.37585e-07
G01997	DNA-damage-inducible protein	210	35	437	255	2.39207e-07
G01998	hypothetical protein	322	76	325	214	2.43857e-07
[truncated: 881 more rows]

## Sheet: Supple Table S7
Supplemental table S7. Query sequences of the virulence genes used for homology search.
gene	pathotype	product	strain_name
pchA	STEC	regulater	O157 O157 Sakai	ATGCTACATGATCACGTGGCAGAATGTCTGGAGAAAAAAGGACTGTACCGGAGAGCAGCTGAACGATGGGCAAAAGTGATGGTACAGCTAAGTGATGACCAGAAAAGAAAAGTGGCGGCACAGAAACGAGCAGAGTGTTTGCGTAAGGCGCGCCGGACTCCGGTTTCACCGGTGAACCTGACCGAAATAAAACAAGCGGTCAACAGACTACATTCTGAGTTGGGAATGGGATTTGAAGAGCGGCGGGTATTCCGACGATATAAAGGGACAGGAGAACAGAATACGTCCGGAAACGCGCGGTCAAAAAAATGCTAA
pchA	STEC	regulater	O26 11368	ATGCTACATGATCACGTGGCAGAATGTCTGGAGAAAAAAGGACTGTACCGGAGAGCAGCTGAACGATGGGCAAAAGTGATGGTACAGCTAAGTGATGACCAGAAAAGAAAAGTGGCGGCACAGAAACGAGCAGAGTGTTTGCGTAAGGCGCGCCGGACTCCGGTTTCACCGGTGAACCTGACCGAAATAAAACAAGCGGTCAACAGACTACATTCTGAGTTGGGAATGGGATTTGAAGAGCGGCGGGTATTCCGACGATATAAAGGGACAGGAGAACAGAATACGTCCGGAAACGCGCGGTCAAAAAAATGCTAA
pchA	STEC	regulater	O103 12009	ATGCTACATGATCACGTGGCAGAATGTCTGGAGAAAAAAGGACTGTACCGGAGAGCAGCTGAACGATGGGCAAAAGTGATGGTACAGCTAAGTGATGACCAGAAAAGAAAAGTGGCGGCACAGAAACGAGCAGAGTGTTTGCGTAAGGCGCGCCGGACTCCGGTTTCACCGGTGAACCTGACCGAAATAAAACAAGCGGTCAACAGACTACATTCTGAGTTGGGAATGGGATTTGAAGAGCGGCGGGTATTCCGACGATATAAAGGGACAGGAGAACAGAATACGTCCGGAAACGCGCGGTCAAAAAAATGCTAA
pchA	STEC	regulater	O111 11128	ATGCTACATGATCACGTGGCAGAATGTCTGGAGAAAAAAGGACTGTACCGGAGAGCAGCTGAACGATGGGCAAAAGTGATGGTACAGCTAAGTGATGACCAGAAAAGAAAAGTGGCGGCACAGAAACGAGCAGAGTGTTTGCGTAAGGCGCGCCGGACTCCGGTTTCACCGGTGAACCTGACCGAAATAAAACAAGCGGTCAACAGACTACATTCTGAGTTGGGAATGGGATTTGAAGAGCGGCGGGTATTCCGACGATATAAAGGGACAGGAGAACAGAATACGTCCGGAAACGCGCGGTCAAAAAAATGCTAA
ehxA	STEC	enterohemolysin	O157 Sakai	ATGACAGTAAATAAAATAAAGAACATTTTCAATAATGCGACATTGACTACAAAATCAGCATTTAATACAGCATCATCAAGCGTACGTTCCGCTGGAAAAAAACTCATATTATTAATACCTGATAATTATGAAGCTCAGGGCGTGGGTATTAATGAGTTGGTCAAAGCTGCTGATGAGCTTGGAATAGAAATACACCGTACTGAACGAGATGATACAGCGATTGCAAACCAGTTTTTTGGTGCAGCAGAAAAAGTTGTAGGATTAACTGAACGTGGTGTTGCAATATTCGCACCACAACTTGACAAACTTCTGCAGAAGTATCAGAAAGTTGGGAGTAAAATAGGAGGAACCGCTGAAAATGTAGGTAATAATCTGGGAAAAGCCGGAACAGTTCTCTCA…
ehxA	STEC	enterohemolysin	O26 11368	ATGACAGTAAATAAAATAAAGAACATTTTCAATAATGCGACATTGACTACAAAATCAGCATTTAATACAGCATCATCAAGCGTACGTTCCGCTGGAAAAAAACTCATATTATTAATACCTGATAATTATGAAGCTCAGGGCGTGGGTATTAATGAGTTGGTCAAAGCTGCTGATGAGCTTGGAATAGAAATACACCGTACTGAACGAGATGATACAGCGATTGCAAACCAGTTTTTTGGTGCAGCAGAAAAAGTTGTAGGATTAACTGAACGTGGTGTTGCAATATTCGCACCACAACTTGACAAACTTCTGCAGAAGTATCAGAAAGTTGGGAGTAAAATAGGAGGAACCGCTGAAAATGTAGGTAATAATCTGGGAAAAGCCGGAACAGTTCTCTCA…
ehxA	STEC	enterohemolysin	O103 12009	ATGACAGTAAATAAAATAAAGAACATTTTCAATAATGCGACATTGACTACAAAATCAGCATTTAATACAGCATCATCAAGCGTACGTTCCGCTGGCAAAAAACTCATATTATTAATACCTGATAATTATGAAGCTCAGGGCGTGGGTATTAATGAGTTGGTCAAAGCTGCTGATGAGCTTGGAATAGAAATACACCGTACTGAACGAGATGATACAGCGATTGCAAACCAGTTTTTTGGTGCAGCAGAAAAAGTTGTAGGATTAACTGAACGTGGTGTTGCAATATTCGCACCACAACTTGACAAACTTCTGCAGAAGTATCAGAAAGTTGGGAGTAAAATAGGAGGAACCGCTGAAAATGTAGGTAATAATCTGGGAAAAGCCGGAACAGTTCTCTCA…
ehxA	STEC	enterohemolysin	O111 11128	ATGACAGTAAATAAAATAAAGAACATTTTCAATAATGCGACATTGACTACAAAATCAGCATTTAATACAGCATCATCAAGCGTACGTTCCGCTGGCAAAAAACTCATATTATTAATACCTGATAATTATGAAGCTCAGGGCGTGGGTATTAATGAGTTGGTCAAAGCTGCTGATGAGCTTGGAATAGAAATACACCGTACTGAACGAGATGATACAGCGATTGCAAACCAGTTTTTTGGTGCAGCAGAAAAAGTTGTAGGATTAACTGAACGTGGTGTTGCAATATTCGCACCACAACTTGACAAACTTCTGCAGAAGTATCAGAAAGTTGGGAGTAAAATAGGAAGAACCGCTGAAAATGTAGGTAATAATCTGGGAAAAGCCGGAACAGTTCTCTCA…
espP	STEC	serine protease	O157 Sakai	ATGAATAAAATATACTCTCTTAAATACAGCCATATTACAGGAGGGTTAATCGCTGTTTCTGAATTATCCGGCAGAGTATCATCAAGAGCAACTGGTAAGAAAAAACACAAACGCATACTTGCATTATGTTTTTTAGGCTTATTACAATCCTCATATTCTTTTGCGTCACAGATGGATATTTCAAATTTCTACATCCGTGACTATATGGATTTTGCACAGAACAAGGGCATATTTCAGGCTGGCGCAACAAATATTGAAATAGTGAAGAAAGATGGCTCCACCCTGAAACTACCGGAAGTACCATTTCCTGACTTCTCACCGGTTGCAAACAAAGGGTCAACCACATCTATTGGTGGTGCATACAGTATCACAGCCACACACAATACGAAAAACCACCAC…
efa1	STEC	adhesin	O157 Sakai	ATGATTCATCCTGGCTCTTCTTTAGATAAAGCAATTAACAATACAAGAGTTAAAAATGTTAGTACTGATGTTAAACATGGCCAAATTCAAGAGAGAAAAAGGAACTTTATCTATAAAAAAAATGATGATATCTCATCCAGATTTAAACTTTACAGTTCGCTCGTAAAGCAGAAAAATGCGACAGAAGATGTTGTTTTAATAGGCAAAATGATTTTAGATGAAGTTAGAAGTTACAGAACTATACATAATGATCGAAATATCGTAAGTAACTCAGGAAACTGGAAAACATCTTTTTTATGTAATCTTGCTAGACTACTATATAGCATATTTAATGGTAGTAACTATTTTTGTTCCCGAGAGGGTGAAAATAATTCATCCCCCAGTTCTACTCTACTTACT…
efa1	STEC	adhesin	O26 11368	ATGATTCATCCAGGTTCTTTTTTAGATAAGACAATTAACAATACAAGAGGTAAAAATGTTAATGCTAATATCAAACATAGTCAAATTCAAGAGATAAAAAGGAATTTCACCTATAAAAAAAATGATGACATCTCATCCAGATTTAAATTTTACAGCTCGCTAGTAAAGCAGAAAAACTCAACAGAAGATGTTGTTTTGATAGGAAAAATGATTTCAGATGAAGTTAGAAATTACAGCACCATACATAATGATAGAAATATCATAATTAACTCTGGAAATTGGAAAACATCTTTTTTATGTAATCTTGCCAGACTACTATATAGCATGTTTAATGGTAGCGTCTATTTTCCTTCCCGTGATGATGAAAATAGCTCATCCCCCAGCCCAACTCTACCTACT…
stcE	STEC	zinc metalloprotease	O157 Sakai	ATGAAATTAAAGTATCTGTCATGTACGATCCTTGCCCCTCTGGCGATTGGGGTATTTTCTGCAACAGCTGCTGATAATAATTCAGCCATTTATTTCAATACCTCCCAGCCTATAAATGATCTGCAGGGTTCGTTGGCCGCAGAGGTGAAATTTGCACAAAGCCAGATTTTACCCGCCCATCCTAAAGAAGGGGATAGTCAACCACATCTGACCAGCCTGCGGAAAAGTCTGCTGCTTGTCCGTCCGGTGAAAGCTGATGATAAAACACCTGTTCAGGTGGAAGCCCGCGATGATAATAATAAAATTCTCGGTACGTTAACCCTTTATCCTCCTTCATCACTACCGGATACAATCTACCATCTGGATGGTGTTCCGGAAGGTGGTATCGATTTCACACCT…
stcE	STEC	zinc metalloprotease	O103 12009	ATGAAATTAAAGTATCTGTCATGCATGATCCTTGCCTCTCTGGCGATGGGAGCATTTGCTGCAACTGCTGCTGATAATAATTCAGCCATTTATTTCAATACCACCCAGCCCGTAAATGATCTGCAGGGGGGACTGGCCGCTGAGGTGAAATTTGCACAGAGCCAGATTTTATCTGCCCATCCTAAAGAAGGGGAAAGTCAACAACATCTGACCAGCCTGCGGAAAAGTTTGCTGTTGGTCCGTCTGGTGAAGGCTGATGATAAAACACCTGTTCAGGTGGAAGCCCGAGATGCTAATGATAAAATTCTCGGTACGTTAACCCTTTCGCCTCCCTCCTCACTACCGGATACCGTCTACCACCTAGATGGTGTTCCTGCTGATGGTATCGATTTTACTCCT…
etpD	STEC	type-II effector	O157 Sakai	TTGTTCAGGAAATGGTTGAATGGGCGTTTGCCGGTACTTGTGTTCACTACAGTAATTTTGGGGGCCATTCCAGGGTGGGGGGCTGAATTTTCGGCCAACTTTAAAGATACGGATATTCAGGAGTTCATAAATACTGTCAGTAAAAATTTACACAAAACGGTAATAATTAATCCTGACGTGCAGGGAACCATCACTGTACGCAGCTACGATATGCTGAACGAGGAACAATATTATCAGTTCTTTCTCAGTGTGCTGGACGTTTATGGTTTTGCTGTGGTCGATATGCACAACGGTATACTGAAAGTAGTGCGCTCAAAAGATGCCAAAACGTCGGCGGTGCCGGTAGCTAGTGATGTCAGTCCCGGGACTGGTGATGAGGTTGTTACCCGGGTGGTCCCC…
etpD	STEC	type-II effector	O103 12009	TTGTTCAGGAAATGGTTGAACGGGCGCTTGTCGATATTTGTATTCACGACAGTATTTCTGAGTGCCATTCCGGGATGGGGGGCTGAATTTTCGGCCAGCTTTAAAGATACGGATATTCAGGAGTTCATTAATACTGTCAGCAAAAATCTGCACAAAACGGTAATAATTAATCCTGATGTGCAGGGGACCATCACTGTACGCAGCTACGATATGCTGAACGAGGAACAATATTATCAGTTCTTTCTCAGCGTGCTGGATGTTTATGGTTTTGCCGTGGTCGATATGCACAACGGTATACTGAAAGTGGTGCGTTCAAAAGATGCTAAAACGTCGGCGGTGCCGGTAGCTAGTGATGCCAGCCCTGGGACTGGTGATGAGGTTGTTACCCGGGTGGTCCCC…
katP	STEC	katalase peroxidase	O157 Sakai	ATGATAAAAAAAACTCTTCCTGTTCTGATTCTTCTGGCGCTATCGGGGAGCTTTTCTACCGCTGTAGCCGCTGATAAAAAAGAGACTCAAAATTTCTACTATCCAGAAACACTGGATTTAACTCCTCTGAGATTACACAGCCCTGAATCAAATCCCTGGGGGGCTGATTTTGATTATGCCACCAGATTTCAACAGCTGGATATGGAGGCTCTGAAAAAAGATATCAAAGATTTGCTGACAACTTCCCAGGATTGGTGGCCTGCGGATTATGGTCATTATGGTCCTTTCTTTATTCGTATGGCTTGGCACGGTGCCGGAACATACAGGACATATGATGGCCGGGGAGGCGCCAGTGGTGGTCAGCAACGTTTTGAACCGCTGAACAGCTGGCCGGATAAC…
katP	STEC	katalase peroxidase	O26 11368	ATGATAAAAAAAACTCTTCCTGTTCTGATTCTTCTGGCGCTATCGGGGAGCTTTTCTACCGCTGTAGCCGCTGATAAAAAAGAGACTCAAAATTTCTACTATCCAGAAACACTGGATTTAACTCCTCTGAGATTACACAGCCCTGAATCAAATCCCTGGGGGGCTGATTTTGATTATGCCACCAGATTTCAACAGCTGGATATGGAGGCTCTGAAAAAAGATATCAAAGATTTGCTGACAACTTCCCAGGATTGGTGGCCTGCGGATTATGGTCATTATGGTCCTTTCTTTATTCGTATGGCTTGGCACGGTGCCGGAACATACAGGACATATGATGGCCGGGGAGGCGCCAGTGGTGGTCAGCAACGTTTTGAACCGCTGAACAGCTGGCCGGATAAC…
ecf1	STEC	EHEC factor for adherene	O157 Sakai	ATGTTGAATGCAAGGCATCTTCCCGTACTGATGTATCATCATGTCAGTCGTTGTCCGGGGCTTGTGACACTCTCACCTGAAACATTTTGTGAACAGATGAAGTGGCTCGCAGATAATAACTGGCGGACGGTAACATCTGCTGAGCTTGAATATTTTTATCAGGGGGGAACGCTTCCACGAAAGAGTGTCATGCTCACATTCGATGATGGTTATCTTGATAACTGGCTCAGAGCATGGCCGGTCCTGAAGGAATATAACCTTCATGCACATATTTTTCTCATTACGGGGCTGATTGGTAAGGGAAACGTACGTAGCAGGCAGGAGCAGGAATATTCTCACCGCGACTGTGAACGGTTGATTGCCGATAACCGTTCAGATGAGGTCATGCTTCGCTGGTCT…
ecf1	STEC	EHEC factor for adherene	O26 11368	ATGTATCATCATGTCAGTCGTTGTCCGGGGCTTGTGACACTCTCACCTGAAACATTTTGTGAACAGATGAAGTGGCTCGCAGATAATAACTGGCGGACGGTAACATCTGCTGAGCTTGAATATTTTTATCAGGGGGGAACGCTTCCACGAAAGAGTGTCATGCTCACATTCGATGATGGTTATCTTGATAACTGGCTCAGAGCATGGCCGGTCCTGAAGGAATATAACCTTCATGCACATATTTTTCTCATTACGGGGCTGATTGGTAAGGGAAACGTACGTAGCAGGCAGGAGCAGGAATATTCTCACCGCGACTGTGAACGGTTGATTGCCGATAACCGTTCAGATGAGGTCATGCTTCGCTGGTCTGAAGTCCGGGAAATGCGTGATTCCGGACTG…
ecf1	STEC	EHEC factor for adherene	O103 12009	ATGTTGAATGCAAGGCATCTTCCCGTACTGATGTATCATCATGTCAGTCGTTGTCCGGGGCTTGTGACACTCTCACCTGAAACATTTTGTGAACAGATGAAGTGGCTCGCAGATAATAACTGGCGGACGGTAACATCTGCTGAGCTTGAATATTTTTATCAGGGGGGAACGCTTCCACGAAAGAGTGTCATGCTCACATTCGATGATGGTTATCTTGATAACTGGCTCAGAGCATGGCCGGTCCTGAAGGAATATAACCTTCATGCACATATTTTTCTCATTACGGGGCTGATTGGTAAGGGAAACGTACGTAGCAGGCAGGAGCAGGAATATTCTCACCGCGACTGTGAACGGTTGATTGCCGATAACCGTTCAGATGAGGTCATGCTTCGCTGGTCT…
ecf1	STEC	EHEC factor for adherene	O111 11128	ATGTTGAATGCAAGGCATCTTCCCGTACTGATGTATCATCATGTCAGTCGTTGTCCGGGGCTTGTGACACTCTCACCTGAAACATTTTGTGAACAGATGAAGTGGCTCGCAGATAATAACTGGCGGACGGTAACATCTGCTGAGCTTGAATATTTTTATCAGGGGGGAACGCTTCCACGAAAGAGTGTCATGCTCACATTCGATGATGGTTATCTTGATAACTGGCTCAGAGCATGGCCGGTCCTGAAGGAATATAACCTTCATGCACATATTTTTCTCATTACGGGGCTGATTGGTAAGGGAAACGTACGTAGCAGGCAGGAGCAGGAATATTCTCACCGCGACTGTGAACGGTTGATTGCCGATAACCGTTCAGATGAGGTCATGCTTCGCTGGTCT…
bfpA	STEC	bundle forming pilus	E2348	ATGGTTTCTAAAATCATGAATAAGAAATACGAAAAAGGTCTGTCTTTGATTGAATCTGCAATGGTGCTTGCGCTTGCTGCCACCGTTACCGCAGGTGTGATGTTTTACTACCAGTCTGCGTCTGATTCCAATAAGTCGCAGAATGCTATTTCAGAAGTAATGAGCGCAACGTCTGCAATTAATGGTCTGTATATTGGGCAGACCAGTTATAGTGGATTGGACTCAACGATTTTACTTAACACATCTGCAATTCCGGATAATTACAAAGATACAACAAACAAAAAAATAACCAACCCATTTGGGGGGGAATTAAATGTAGGTCCAGCAAACAATAACACCGCATTTGGTTACTATCTGACGCTTACCAGGTTGGATAAAGCGGCATGTGTTAGTCTTGCA…
eibG	STEC	adhesin	393/98	ATGAGTAAAAAGTTTACAATGACACTTCTGTCATCTTCTCTGGGTGGGCTTCTGCTTGGGATCAGCTCAGGTGTTTTAGCTCAGGAGTTACCTCCTATCAAAGATTCTGGTTTGCCTTTTTATTCAGTGCTGAAAGAGGCAGATGCTTCGCATGTTACATACGGTAGTACTTATCGTATTTACTATAACAAATCCTCTGGTTGGGGAACAATGCGATATGTTCTGAACGGAAAAGATGAGACCCTTTTTAATTTCGATCAGGAGGGTAATATTATAGTATTGAGTAAAGATAACTCAATTGCATATACCGTTCATGAGCCTGTGCTAAAAGACTTTGCCCGTATGGCAGCAGGCCTCAGAACGTCTGACAAAGAAAACGGTAAGCATCAGGTTGATGAG…
espC	STEC	entero toxin	E2348	ATGAATAAAATATACGCATTAAAATATTGTCACGCGACAGGGGGGCTGATTGCTGTATCCGAACTGGCCTCCAGAGTTATGAAGAAAGCCGCTCGCGGCAGCCTTTTAGCATTATTTAATCTATCATTGTATGGTGCTTTTTTAAGCGCATCTCAGGCTGCTCAACTAAATATTGATAATGTATGGGCTAGAGATTATTTAGACCTCGCACAAAATAAGGGGGTGTTTAAAGCTGGTGCGACCAATGTTTCAATTCAACTCAAGAATGGCCAGACGTTTAATTTTCCAAATGTTCCAATTCCTGATTTCTCGCCGGCCTCAAATAAAGGCGCTACTACATCTATAGGTGGAGCTTATAGTGTCACAGCAACCCATAACGGAACAACTCATCATGCAATA…
hes	STEC	Hemagglutinin from Shiga toxin-producing E. coli	RM10042	ATGAAAAAGGTTATTGTGGTTTCAGTATTTGCAATGGCGGGTATGTTTTCAGCCCAGGCCTTGGCTGATGAGAGCAAAACAGGTTTTTATATGACCGGTAAGGCGGGGACTTCCGTTTTATCTCTTTCCAACCAGCGTCTTATCGATGGTGAAGGAGAGTGGGCGGACAAATATAAAGGTGGTGATGACCATGATACGGTATTCAGTGGCGGTATCGCGGCTGGTTATGATTTTTATCCGCAGTTCAGTATTCCGGTTCGTACGGAACTGGAGTTTTACGCTCGTGGAAAAGCTGATTCGAAGTATAACGTAGATAAAGACAGTTGGTCAGGTGGTTACTGGCGTGATGACCTGAAGAATGAAGTGTCAGTCAACACACTGATGCTGAATACGTACTAT…
ihaA	STEC	Iron regulated adhesin	O157 Sakai	TCAGAACTGATAGTTCAGCGACATCCAGTAATTTCGCTCAGGTATCACATATCCTGTTGTTGATGATCCCGTCTGGAAGTAATCACCGGCATACAGCGTACTCTTACCGGCACTGTACAGGCTCACGTCACTGTAATCCTTGTTGAGCAGGTTATTCACCGCAGCATTCAGCGTCAGGGCATCCGTCATCTTCCACGACAGACCTGCATCCACCACCGTCCAGGCTTTCAGGTATTCTCCTTTCTCATCATACACTTTCTTCTGTACAGCGCTCAGTGACGAATAATTCTGGGTGAAACGTGGTGTTTTCCCGCGATAACGGGCACCCAGCCATGATGCCACCTCTTCGGTGATCTGCCAGTTCAGTTTCGCATTCACCATGTGTTCAGGGGTATAACT…
ihaA	STEC	Iron regulated adhesin	O26 11368	ATGCGAATAACCACTCTGGCTTCCGTAGTCATTCCCTGTCTCGGATTTTCAGCCAGCAGCATAGCTGCTGCAGAGGATGTGATGATTGTCTCGGCATCCGGCTATGAGAAAAAGCTGACTAACGCAGCCGCCAGTGTTTCTGTGATTAGCCAGGAGGAATTGCAGTCCAGCCAGTACCACGATCTGGCGGAGGCTCTGAGATCAGTAGAGGGTGTGGATGTTGAAAGTGGTACGGGTAAAACCGGAGGGCTGGAAATCAGCATCCGAGGAATGCCAGCCAGTTACACGCTGATACTGATTGATGGTGTTCGTCAGGGCGGAAGCAGTGACGTGACTCCCAACGGTTTTTCTGCCATGAATACCGGGTTCATGCCCCCTCTGGCCGCCATTGAGCGTATT…
ihaA	STEC	Iron regulated adhesin	O111 11128	ATGCGAATAACCACTCTGGCTTCCGTAGTCATTCCCTGTCTCGGATTTTCAGCCAGCAGCATAGCTGCTGCAGAGGATGTGATGATTGTCTCGGCATCCGGCTATGAGAAAAAGCTGACTAACGCAGCCGCCAGTGTTTCTGTGATTAGCCAGGAGGAATTGCAGTCCAGCCAGTACCACGATCTGGCGGAGGCTCTGAGATCAGTAGAGGGTGTGGATGTTGAAAGTGGTACGGGTAAAACCGGAGGGCTGGAAATCAGCATCCGAGGAATGCCAGCCAGTTACACGCTGATACTGATTGATGGTGTTCGTCAGGGCGGAAGCAGTGACGTGACTCCCAACGGTTTTTCTGCCATGAATACCGGGTTCATGCCCCCTCTGGCCGCCATTGAGCGTATT…
lpxR	STEC	lipid A 3'-O-deacylase	O157 Sakai	ATGAAAAAAAGTGTCATCGCTGGCGTCTTTATTGCTCTGTCATTTACCACGTGTTCAGCTATCGCGAACAGCCTTGCATTATCATTAGCAAATGATGATGCAGGGAAGTTTCAACCAATACTTAATGATATTTATGGCAATAAACATGAAAACAGAGATGATTACTCACAAGGCTTATTTCTGGGATATAGCCACGATATCTCAGACTCGAGCCAATTATCTCTCCATATTGCGCAAGATATTTACTCTCCATCAGGCAGTAATAAAAGACACAACACAGCTGTAACTGGAGACAGAGCTTTTAGTGCATACACTCACACTGGTATTGAATGGAACTCCCTTGCGAATGACTGGATTCGCTATCGATTAGGTACTGACATAGGTGTTGTTGGCCCCGAC…
paa	STEC	adhesin	O157 Sakai	ATGAGGAACATAATGGCAGGTTTTTTAATATTCCTGTCTTCTGCTGCTTATGCTGATATCAATCTGTATGGTCCTGGTGGCCCGCATACAGCCTTGCTTGATGCAGCCAAACTTTATGCCGAAAAAACAGGTATTATAGTGAACGTTCATTACGGCCCACAGAACAAATGGAATGAAGATGCCAAAAAAAATGCAGATATCTTGTTTGGCGCATCAGAACAATCTGCTCTGGCTATCATTCGGGACCATAAAGACAGCTTCAGTGAAAAAGATATTCAGCCTCTTTATCTGCGAAAAAGTATTTTACTGGTAAAGAAAGGTAATCCTAAAAATATCCGGAGTATTGACGACCTGACCAGACCTGGGATTGGCGTAATTGTTAATGATGGTGGTGGTACC…
paa	STEC	adhesin	O26 11368	ATGGCAGGTTTTTTAATATTCCTGTCTTCTGCTGCTTATGCTGATATCAATCTGTATGGTCCTGGTGGCCCGCATACAGCCTTGCTTGATGCAGCCAAACTTTATGCCGAAAAAACAGGTATTATAGTGAACGTTCATTACGGCCCACAGAACAAATGGAATGAAGATGCCAAAAAAAATGCAGATATCTTGTTTGGCGCATCAGAACAATCTGCTCTGGCTATCATTCGGGACCATAAAGACAGCTTCAGTGAAAAAGATATTCAGCCTCTTTATCTGCGAAAAAGTATTTTACTGGTAAAGAAAGGTAATCCTAAAAATATCCGGAGTATTGACGACCTGACCAGACCTGGGATTGGCGTAATTGTTAATGATGGTGGTGGTACCAGTAATACATCA…
paa	STEC	adhesin	O103 12009	ATGGCAGGTTTTTTAATATTCCTGTCTTCTGCTGCTTATGCTGATATCAATCTGTATGGTCCTGGTGGCCCGCATACAGCCTTGCTTGATGCAGCCAAACTTTATGCCGAAAAAACAGGTATTATAGTGAACGTTCATTACGGCCCACAGAACAAATGGAATGAAGATGCCAAAAAAAATGCAGATATCTTGTTTGGCGCATCAGAACAATCTGCTCTGGCTATCATTCGGGACCATAAAGACAGCTTCAGTGAAAAAGATATTCAGCCTCTTTATCTGCGAAAAAGTATTTTACTGGTAAAGAAAGGTAATCCTAAAAATATCCGGAGTATTGACGACCTGACCAGACCCGGGATTGGCGTAATTGTTAATGATGGTGGTGGTACCAGTAATACATCA…
paa	STEC	adhesin	O111 11128	ATGGCAGGTTTTTTAATATTCCTGTCTTCTGCTGCTTATGCTGATATCAATCTGTATGGTCCTGGTGGCCCGCATACAGCCTTGCTTGATGCAGCCAAACTTTATGCCGAAAAAACAGGTATTATAGTGAACGTTCATTACGGCCCACAGAACAAATGGAATGAAGATGCCAAAAAAAATGCAGATATCTTGTTTGGCGCATCAGAACAATCTGCTCTGGCTATCATTCGGGACCATAAAGACAGCTTCAGTGAAAAAGATATTCAGCCTCTTTATCTGCGAAAAAGTATTTTACTGGTAAAGAAAGGTAATCCTAAAAATATCCGGAGTATTGACGACCTGACCAGACCTGGGATTGGCGTAATTGTTAATGATGGTGGTGGTACCAGTAATACATCA…
saa	STEC	adhesin	98NK2	ATGCTCAAAAGAAATTGTGTGCATTCGATATTAGCTCTTACCTTCATGGCAACGAGTACTCATGCAGCCCCCCATAATGGAGTGACTTATGAAAGCCTTGAAAAAGGGAAGTTTAGTGATTTAAGTAGTTTTTTGAAAACGATCAATCTTTATGATAAAGATAATAATTTAATTGATAATGGGAAGCAACTTGACATAAGTAAAGCTGAAAACAAATATCTTTTTTACACATTAAAGACAAACAAACAAGCAGGTCTCTCTCCTGAAGGTTTTGGCACGACATTGAGTTCAATCGCAACTTATTATGATTATGCAAAAGAACAAGCTTACTTTGTAGATAAAGAGTCTAAAAAAATCCTATTATCATCCGATGGTTTAGGGAATGTAATGGTCATTGGA…
sab	STEC	STEC autotransporter mediating biofilm formation	EH41	TTACCACTGCCAGCCCACACCGGCACCGACGGAGAAATTACCCCGGGTGTTCTGACCTGCATTCAGTTTCATTATCACCTTACCGTTATCGGAGATACGGGACACACCTATTGCAATGGCGCTTTCACCACCATATCCACCGACACCCAGCCCCATCAGACTTTTACCCGGCAGATAGGCCTGAGGTATCCCACTCATGGCCGCAGCCGATGCACCAACACCACGGATATCCCGGTTAAGCTCTTCCACCCGGTAGCTCAGCTGGCTGAATTTATTCCCGAGAGTGTTTATCGCCTGTGTATTTCCGGCAACCTGACGGTTAGTTGCATGCAACTGACTGCCATTGACGGCATCCGTTGAGTTCGCAGACAACACACCTGGTGCCACTGACTGCAGTTG…
subA	STEC	Subtilase cytotoxin	EC40	ATGCTTAAGATTTTATGGACGTATATTCTATTCCTGCTTTTTATATCTGCGTCAGCTAGGGCGGAAAAACCCTGGTATTTTGATGCAATTGGTCTGACAGAAACAACAATGTCTCTTACAGACAAAAATACCCCAGTGGTCGTATCTGTTGTTGATTCCGGAGTGGCATTTATTGGAGGTCTCAGCGATAGTGAATTTGCAAAATTTAGTTTTACTCAGGATGGTTCACCGTTCCCGGTAAAAAAGTCTGAAGCTTTATATATTCATGGTACTGCTATGGCTTCCCTCATTGCCTCACGTTATGGGATTTATGGTGTTTATCCTCATGCTCTGATATCCAGTAGAAGAGTTATTCCTGACGGTGTACAGGACTCATGGATTAGAGCAATTGAAAGCATT…
ureC	STEC	urease-associated protein	O157 Sakai	ATGAGTAATATTTCACGCCAGGCCTATGCTGACATGTTCGGCCCTACCACCGGTGATAAAATTCGTCTGGCAGACACTGAGCTGTGGATCGAGGTCGAAGATGATTTAACTACCTACGGCGAAGAGGTCAAATTCGGCGGCGGTAAAGTAATCCGCGACGGTATGGGACAGGGGCAAATGCTCTCCGCCGGCTGCGCTGATCTGGTGCTGACCAATGCCCTGATCATCGATTACTGGGGGATCGTTAAAGCCGATATCGGCGTCAAAGATGGAAGGATATTTGCTATCGGCAAAGCCGGTAATCCTGATATACAACCCAACGTCACTATCCCAATCGGCGTATCCACGGAAATTATTGCCGCAGAAGGCAGGATCGTTACCGCAGGTGGCGTCGATACG…
ureC	STEC	urease-associated protein	O26 11368	ATGTTCGGCCCTACCACCGGTGATAAAATTCGTCTGGCAGACACTGAGCTGTGGATCGAGGTCGAAGATGATTTAACTACCTACGGCGAAGAGGTCAAATTCGGCGGCGGTAAAGTAATCCGCGACGGTATGGGACAGGGGCAAATGCTCTCCGCCGGCTGCGCTGATCTGGTGCTGACCAATGCCCTGATCATCGATTACTGGGGGATCGTTAAAGCCGATATCGGCGTCAAAGATGGAAGGATATTTGCTATCGGCAAAGCCGGTAATCCTGATATACAACCCAACGTCACTATCCCAATCGGCGTATCCACGGAAATTATTGCCGCAGAAGGCAGGATCGTTACCGCAGGTGGCGTCGATACGCATATTCACTGGATCTGCCCACAGCAGGCTGAA…
ureC	STEC	urease-associated protein	O103 12009	ATGATGAGTAATATTTCACGCCAGGCCTATGCTGACATGTTCGGCCCTACCACCGGTGATAAAATTCGTCTGGCAGACACTGAGCTGTGGATCGAGGTCGAAGATGATTTAACTACCTACGGCGAAGAGGTCAAATTCGGCGGCGGTAAAGTAATCCGCGACGGTATGGGACAGGGGCAAATGCTCTCCGCCGGCTGCGCTGATCTGGTGCTGACCAATGCCCTGATCATCGATTACTGGGGGATCGTTAAAGCCGATATCGGCGTCAAAGATGGAAGGATATTTGCTATCGGCAAAGCCGGTAATCCTGATATACAACCCAACGTCACTATCCCAATCGGCGTATCCACGGAAATTATTGCCGCAGAAGGCAGGATCGTTACCGCAGGTGGCGTCGAT…
ureC	STEC	urease-associated protein	O111 11128	ATGAGTAATATTTCACGCCAGGCCTATGCTGACATGTTCGGCCCTACCACCGGTGATAAAATTCGTCTGGCAGACACTGAGCTGTGGATCGAGGTCGAAGATGATTTAACTACCTACGGCGAAGAGGTCAAATTCGGCGGCGGTAAAGTAATCCGCGACGGTATGGGACAGGGGCAAATGCTCTCCGCCGGCTGCGCTGATCTGGTGCTGACCAATGCCCTGATCATCGATTACTGGGGGATCGTTAAAGCCGATATCGGCGTCAAAGATGGAAGGATATTTGCTATCGGCAAAGCCGGTAATCCTGATATACAACCCAACGTCACTATCCCAATCGGCGTATCCACGGAAATTATTGCCGCAGAAGGCAGGATCGTTACCGCAGGTGGCGTCGATACG…
eltIIaA	ETEC	heat-labile toxin LT-Ⅱa	SA53	ATGATTAAGCATGTATTGTTGTTTTTTGTTTTTATATCATTTTCTGTTTCAGCAAACGATTTCTTTAGAGCAGACTCCAGAACACCTGATGAAATAAGACGTGCGGGAGGGCTTTTACCAAGAGGGCAGCAGGAAGCTTATGAGCGCGGAACGCCAATTAACATCAATCTGTATGAGCATGCTCGCGGAACAGTAACGGGGAACACCAGATATAATGATGGATATGTATCTACAACTGTAACGTTGAGACAGGCTCATTTAATAGGGCAGAATATACTTGGCAGTTATAATGAATATTACATATATGTAGTCGCACCAGCACCAAATTTATTTGATGTGAATGGTGTGTTAGGACGGTATAGTCCATATCCCAGTGAAAATGAATTTGCTGCATTAGGA…
sta	ETEC	heat stable enterotoxin STI	EC2173	TTAATAACATCCAGCACAGGCAGGATTACAACAAAGTTCACAGCAGTAAAATGTGTTGTTCATATTTTCTGATTTTTTTTCACTGTTGTTTTTTACAACATCACACTTTTTAGTCTCTAATGTAATTTTCTCTTTTGAAGAGTCAAGTGATTCAGTTGACTGACTAAAAGAGGGGAAAGATAATACAGAAATAAAAATTGCCAACATTAGCTTTTTCAT
tia	ETEC	toxigenic invasion loci A	H10407	ATGATTGAAATGAAAAAGGTTATTGCGGTTTCAGCGCTTGCAATGGCAGGTATGTTTTCGGCCCAGGCTCTGGCTGATGAGAGCAAAACAGGCTTTTATGTGACCGGTAAAGCCGGTGCTTCAGTTGTGATGCAGACTGACCAGCGCTTCCGTCAGGACTTTGGGGATGATGTTTATAAGTATAAGGGCGGTGATAAAAACGATACTGTATTTGGTGCCGGCCTTGCAGTGGGCTATGATTTTTATCAACATTACAATGTTCCAGTACGCACGGAAGTGGAATTCTATGGCCGTGGAGCTGCAGACTCCCGTTATACACTGGATACATGGCGTTCTCCGATGGGGGATGGTGGTCGGGAAGACACACAAAATAGGCTCAGTGTGAATACCCTGATGGTG…
aafA	EAEC	aggregative adherence fimbriae AAFs	042	ATGAAAAAAATCAGAATGTTTGCGATTGCTACTTTATTATCAAGTGGAGCCGCTATTAATGCAACTGCGGTAGCAAAAACTGCGACCAGTACTATCACTGTAGTGAATTTTTGTGATATAACGATAACACCGGCTACAAATCGTGATGTCAACGTTGACAGGAGCGCAAATATCGACCTGAGTTTTACTATTAGACAACCGCAACGCTGCGCTGATGCTGGTATGCGAATAAAAGCTTGGGGGGAAGCCAATCACGGTCAATTACTGATAAAACCTCAAGGAGGAAATAAATCAGCAGGATTCACTCTGGCCTCTCCTAGGTTTTCTTACATTCCGAATAATCCAGCAAACATTATGAATGGATTTGTTCTTACGAATCCTGGTGTTTATCAATTAGGA…
aggR	EAEC	regulation	55989	TCATTGGCTTTTAAAATAAGTCAAGAATTGTTTTGGTGTTATGCCAAAATGTTTTACAAAAAGCCTAATGAAATATGATGTACTGGAAAATCCTATCATATTAGATATCTGTGATATCTGATATGAGTTATCAAGCAACAGCAATGCTGCTTTGCTCATTCTTGATTGCATAAGGATCTGGTTAAAAGTAATATACTCTGACTCAAGCCTTTTCCTTATTGTTATCTCTGATACATTAAATTCATCTGCAATAATAGCTAGAGTCCATCTCTTTGATAAGTCCTTCTCGATTGTGTTTCTGACCTTATCGGAAAAGAAGCTTACAGCCGATATATAAATTGACTCTATAATTTTCCTGTTGTTTTCGATCTTTGATATAAGATATATCAAATCTGAAGT…
aatA	EAEC	dspersin	042	GTGAGACACATATTATACTCATTTCTTGCAATAAATGCTTATCTGTTTTCGACACAGACTCTGGCAAAAGACTGTATCATTGATAATTTCTTTCAGAAAAGCATCCAGTTTAATTCTTATTCTCTTGATATCGAAGAGTTGGATATTAATAAACATAACAATATAAAAACGATGTTACCAGATATAAATATAGGGTTAGGGCAGTATATAAACAACAATCAGTGGTTCTCATCTATTACAGACAGCAATTTTTATTTATCATTATCCTATAATCTTCTATCGGCTTATGAAGCAAAAATGCAGAATGATAAATTGGATATTGCTAATTATTTAAAATATATTGAAATGCTTAGTGAGAGAAACAACTATATAATTAATTTGTTCTCGGAAATCATTAAC…
invE	EIEC	regulator	Shigella flexneri 5a str. M90T	TTATGAAGACGATAGATGGCGAGAAATTATATCCCGAATAGCTTCATCTATTTCTCTCTGAACTGTTTTGTTTATTTTAGATAATGTAAATATTAGAGTTCTGTTTGTTTTATTCTCTTTTCTTTTTATGTAAGTCCGTTTGTCTTTAGAAATAAATAACGAGTCAACTTTTAGCGAAGGGTTTTGCTTTCTGTTTTTGCTTTTCTTTATGATGTTTAAAATTTCTTTTTTATATATGTCCGGGGGCAGATTTGTATCAAGGTCTTTTATTTCTTCCTTTAATATTGGTAGTGTAGAACTAAGAGATTCATTAGCCTTTTCAAGTCCTTTATAATAATTGAATAATATCTTGTAGTCATTAAAGTTAAGTTCTGACGCGATTGGAAATAGAGATATTAT…
ipaH	EIEC	incasive plasmid antigen	FORC_011	CATGGCTGGAAAAACTCAGTGCCTCTGCGGAGCTTCGACAGCAGTCTTTCGCTGTTGCTGCTGATGCCACTGAGAGCTGTGAGGACCGTGTCGCGCTCACATGGAACAATCTCCGGAAAACCCTCCTGGTCCATCAGGCATCAGAAGGCCTTTTCGATAATGATACCGGCGCTCTGCTCTCCCTGGGCAGGGAAATGTTCCGCCTCGAAATTCTGGAGGACATTGCCCGGGATAAAGTCAGAACTCTCCATTTTGTGGATGAGATAGAAGTCTACCTGGCCTTCCAGACCATGCTCGCAGAGAAACTTCAGCTCTCCACTGCCGTGAAGGAAATGCGTTTCTATGGCGTGTCGGGAGTGACAGCAAATGACCTCCGCACTGCCGAAGCCATGGTCAGAA…
virA	EIEC	invasion and intercellular	Shigella sonnei Ss046	TTAAACATCAGGAGATATGATGGCAAATGATACTTGACGACTTTCTGGAGGGATAGCATTGCGAAGCCCTTCACTGCTTGGAAGTGTTCCAGCATGAACGAGATAGCTTGTTTCTATTTTATTAATACCAACACCATTACATGTTATGTGCGATGGTAATATTGATGAGCTAACTTCGTAAGCCCTCCCCCCAGAGGCAGAGATTGCAGTGTCGTTTTTAGGGACAACTGCGTTGATTTTTATAATATGTCCACAATTGTTAATAACTCGTTGTTCAGGCATGAAATTAAGCCTGTTTTCTATGTTTTCGGACATAATTTGGGCATATATGTGTTCCACAGAGGAAGACGTGATGTGAAGAGATTGCCAGAATGCAGATGTTAGTGCAGATATAAATGC…
hlyA	ExPEC	haemolysin A	UTI89	ATGCCAACAATAACCACTGCACAAATTAAAAGCACACTACAGTCTGCAAAGCAATCCGCTGCAAATAAATTGCACTCAGCAGGACAAAGCACGAAAGATGCATTAAAAAAAGCAGCAGAGCAAACCCGCAATGCGGGAAACAGACTCATTTTACTTATCCCTAAAGATTATAAAGGACAGGGTTCAAGCCTTAATGACCTTGTCAGGACGGCAGATGAACTGGGAATTGAAGTCCAGTATGATGAAAAGAATGGCACGGCGATTACTAAACAGGTATTCGGCACAGCAGAGAAACTCATTGGCCTCACCGAACGGGGAGTGACTATCTTTGCACCACAATTAGACAAATTACTGCAAAAGTATCAAAAAGCGGGTAATAAATTAGGCGGCAGTGCTGAA…
papA	ExPEC	P fimbriae	CFT073	TTACTGATAAGTCAGGTTGAAATTCGCAACTGCTGAGAAAGCACCTTCTGTTACAGGGTTGCCACTACCATCTTTTCTGACGGCAGCAGTAAAATGAATTGTGTTATCACCATCAACTAAATAGGAAACACCTGTTGCTGTCGCACCATCAAATTTTACGCGTTTTCCATGTGGATCGGTGACAACAATAGCTGTATTTGTTGCACCGACGGTCTGTAACATGTCACTCTGCGGACCACTTGGGACACCCGAAAAAGTCAGAGATACTGTGCCAGTCTTCGCCCCACCACCGCCAGCAGCTTTTTTAAAGTTTGTAATATCACAATTTATAAGTTTAATATCAAAAGATTTGGGTTGACTTTCCCCATCATTCTCCAGAAATAATTTTGATACTTGTCC…
pic	ExPEC	serine protease	O42	GTGAATAAAGTTTATTCTCTTAAATATTGCCCCGTCACCGGGGGGCTTATTGCTGTCTCTGAACTTGCCCGCAGGGTAATAAAAAAGACATGCCGAAGATTAACGCATATTCTTCTGGCTGGCATTCCAGCAATCTGTCTGTGTTACTCTCAGATATCCCAGGCGGGTATTGTCCGTTCCGATATTGCCTATCAGATTTATCGTGATTTCGCCGAAAACAAAGGGCTTTTTGTACCTGGTGCCAATGATATTCCGGTATATGATAAGGACGGAAAACTTGTGGGAAGACTGGGTAAAGCCCCAATGGCCGATTTCAGCAGTGTGAGCTCAAATGGCGTTGCTACGCTTGTATCACCTCAGTATATCGTCAGCGTAAAGCATAACGGAGGATATCGGAGT…
sfaA	ExPEC	S fimbriae	UTI89	ATGAAGTTAAAATTCATCTCCATGGCTGTATTTTCAGCCCTGACCCTGGGTGTTGCGACAAGTGCGTCTGCCGCACCTGCTACTGTCAATGGTGGCACTGTTCATTTTAAGGGGGAAGTGGTTAATGCTGCATGTGCTGTAAATATGAACTCAGTAGATCAGACAGTTTTGCTCGGTCAAGTTCGTACGAAAAAGTTAGCTAATCTTGATGATGTTAGTGGACCGGTTGGATTTAATATTCAATTAGATGAGTGTGATTCCACAACATCTGGATCTGTGAAGATTCTTTTTTCTGGCACACCTGTTGCTGGAAAAAATAACGCCTTGGCTATACAAAGCTCGGCATCTGGAGCTGCAACAAATGTTGGGATTCAGATACTTGACTCCTCAGGGAATCCT…
cdt-IA	not specified	cytolethal distending toxin type I subunit A	E6468/62	GTGGATAAAAAACTAATTGCATTTTTGTGCACACTTATAATTACTGGTTGCTCGAATGGGATCGGTGATTCACCTTCACCTCCGGGAAAAAATGTAGAATTGGTTGGAATCCCTGGACAAGGTATTGCAGTGACTTCAAACGGTGCAACTCCAACACTTGGAGCCAACAACACTGAGTTTCCTGAAGTTTCAATAATGAGCACTGGTGGGGCGCTGCTTACTATTTGGGCCAGACCTGTTCGTAACTGGCTTTGGGGGTATACTCCTTTTGATTCAGTAAATTTTGGTGAGAATCGGAACTGGAAGGTTGTGGATGGGAAAGATGCCGGCACAGTGAAATTTGTTAATGTTGCCCAGGGGACTTGCATGGAGGCCTTTAAAAACGGGGTGATACATAAT…
cdt-IIA	not specified	cytolethal distending toxin type II subunit A	9142-88	ATGGCTAACAAACGTACACCTATTTTTATAGCTGGAATCTTGATCCCCATTTTATTAAATGGTTGCTCATCAGGAAAAAATAAAGCTTATCTTGACCCCAAAGTTTTCCCTCCTCAAGTGGAAGGAGGACCAACCGTTCCTTCCCCCGATGAGCCCGGACTTCCATTGCCCGGGCCAGGACCGGCGCTGCCCACAAATGGCGCAATCCCTATCCCTGAACCAGGTACCGCACCCGCAGTATCTTTAATGAATATGGATGGCTCAGTTCTAACAATGTGGAGCCGCGGAGCTGGTTCATCGTTATGGGCGTATTATATCGGCGACTCCAATTCATTTGGGGAACTACGTAATTGGCAGATTATGCCCGGAACCAGGCCAAATACGATACAGTTTCGCAAT…
cdt-IIIA	not specified	cytolethal distending toxin type III subunit A	S5	ATGACTAATAAATGCACATCTATTTTGATAGTAGGCATTCTTATTCCAATTCTATTAAATGGTTGTTCGTCAAGAAAAAATAGAGCTCATCTTGACCCCAAAGTTTTCCCTCCTCAAGTAGAGGGAGGACCAACAATTCCTTCTCCAGATGAGCCTGGACTTCCATTACCCGGGGCTGGACCAGCACTTCCCACAAATGCACCAATCCCTATCCCGGTACCAGGTACAGCACCCGCAGTATCTTTGATGAACATGGATGGCTCAGTTCTAACAATGTGGAGCCGCGGAGCTGGTTCATCATTATGGGCTTATTATATCAGCGACTCCAATTCATTTGGAGAACTACGCAATTGGCAGATTATGCCCGGAACCAGACCAAATACGATACAGTTCCGCAAT…
cdt-IVA	not specified	cytolethal distending toxin type IV subunit A	APEC O1	GTGGATAAAAAACTAATTGCATTTTTGTGCACACTTATAATTACTGGTTGCTCGGATGGGATCGGTGATTCACCTTCGCCACCGGGAAAGAATGTAGAATTAGTCGGAATTCCAGGGCAAGGTGTCGCTGTTGCTTCAAATGGCACATCTCCAACATTTGGGAGCAACAGTACTGACTTTCCTGATGTTTCAATAATGAGCACAGGGGGAGCGATGCTTACTGTTTGGGCCAGACCTGTCCGTAACTGGCTTTGGGGATATACTCCGTTTGATTCAGTAAGTTTTGGAGAGAATCGGAACTGGAAGGTTGTGGATGGTAAAGATGCCGGTACAGTGAAATTTGTTAATGTTGCCCAGGGGACTTGCATGGAGGCCTTTAAAAACGGGGTGATACATAAT…
cdt-ⅤA	not specified	cytolethal distending toxin type Ⅴ subunit A	B1	ATGGCTAATAAATACACACCTATTTTTATAGCTGGTATCCTGCTCCCCATTTTATTAAATGGCTGCTCATCAGGAAAGAACAAAGCTCATCTTGACCCCAAAGTTTTCCCTCCTCAAGTAGAGGGAGGACCAACAATTCCTTCTCCAGATGAGCCTGGACTTCCATTACCCGGGGCTGGACCTGCACTTCCCACAAATGCACCAATCCCTATCCCGGTACCAGGTACAGCACCCGCAGTATCTTTGATGAACATGGATGGCTCAGTTCTAACAATGTGGAGCCGCGGAGCTGGTTCATCATTATGGGCTTATTATATCAGCGACTCCAATTCATTTGGAGAACTACGCAATTGGCAGATTATGCCCGGAACCAGACCAAATACGATACAGTTCCGCAAT…
cnf1	not specified	toxin	UTI89	TCAAAATTTTTTTGAAAATACCTTCAATACCGATATTTCGGAGGCATCTGCATTCAGAGAATAACTCTCAGACAGAGACCTTACGACAACATTGCCGTCCACTCTCACCAGTACAGTCGCCGATGTACCAAAGCCATGTTCAGGTATATTATCAAGGAAGTAAGGGAAAACAGAAACATTATCACGAATAATAGTGATTTGACTATCTGGTTTTTTTTCAGATGATGAGTAAGTTATTAATGAATCTTCAAAATTTTCCGACAGATAATCGACTAAGAAATCATTGCTCATTATTCCCTCCACGCGAGGTATTGGTTCTTTTGTAAGTAGCTCAAGTACTTCAACTGCTTTTTTCACCCCGGTAGTACTGGTAAATCCAGCCAAAGATTTTGTTGTACC…
cnf2	not specified	toxin	S5	ATGAACGTTCAATGGCAACAAAAATATCTTCTTGAGTACAATGAGTTGGTATCAAATTTCCCTTCGCCAGAAAGAGTAGTTAGCGATTACATTAGGCGTTGTTTCAAAACAGACTTACCTTGGTTTAGTCAAGTGGATCCTGATAACACTTATTTTATACGATTTTCTCAAAGTCGGAGTAATAGTAGATCTTACACCGGATGGGATCATCTTGGAAAATATAAAACAGGAGTACTGACACTCACTCAAGCCGCACTTATTAATATTGGCTATCATTTTGATGTTTTTGATGATGCAAATGCAAGTGCGGGAATCTATAAAACAAGCAGTGCAGATATGTTTAACGAAAAAAATGAAGAGAAAATGCTTCCTTCAGAATACCTTTATTTTTTGAAAGGG…
cif	STEC	effector	E22	MKDITLPPPTSASCLTGAISVNTEAVLSPMQHTSALHVRDFASLCSQNLKANVLLNSDDHEVPIHQKNPAAIMQNIDSNIKQMATDWGMSIEEVEVIIGREKGIVEPSCGVTANAIMKLFLDKDGFSYCFENEQTLSLEQLQERLSCMPECKSFVLRVNDGALGHAYIVDIPKGENSCRPAFLYQSDLGEGVTRKLRFEDWMTHKALTPILLDDICNYFSCMSQNKTDLEQIATLFDIDGNVKMLRKENIQYQKHDNFSFQLFEYDTDNIEKNIEIIKSLCS
espH	STEC	effector	O157 Sakai	MSLSGAVFKTFLTSEHASWNRFNRRLHIPNEDIVDEIQLKARMQQRHHRVYPEIGDSTIVSFRGKDYAVHFIKDGPKDDYVYKVQRITPENGCFSTLFSVFSGGVTKALERKLNERHITPLSSTWFPRTPLEGILAERGLSSLLRRVQSTERLDNRAIATRASSYSVL
espJ	STEC	effector	O157 Sakai	MSIIKNCLSLINNALNIQKTSYSLTKMEQAGKLLNRKITPENTPPMLLSYRNADLTQEKNITERVLSIFKIKRDFVAVRIQNNQFTDLKNKKIQGHQNTVASVMDWYNPQKNALGITMGTPRKSADIAKEEHRNALNFMIMEKNTFHEKILNSNDNLQKSYSKTEDSSWVAASVGSLLDKGAKVYPDTSCSLRLGEPFIFTLPESVRVDVDIYPLKK
espK	STEC	effector	O157 Sakai	MLPTSQLRPTGTFCSYSAETSADIKSEITPIQIEEARASGRLYIKDCDIEYLPQLPNEITSVTIENCNNLTTLTGLPVNTQNLSVINCEKLQITDMPSTVKNLHIELTDSPFIHFISEGIECLTVCHCYISGVPESVRYLEIKGSATDSIKNVPNGLSSLSINSYNPENQARIDNLISPSLKTLSLTGCSNIILPEKLPESVTSVTIHAEQKTTWNIGVEGMPDGLDLDLQNVLLSPDVVKAKNITFQGNALDVALHFREGDIVYGLSSPREKLVNSIKLVNDFSKKDIITQNTLTNAVWDPRTPRKYKQDPLIKRALNEHERGIKFKQHLKNHNNYNVTMADLSVYNRDKLWAKTSKAGLEFQTLTRNKTVIFCADELVNSLKLIANKSEGYGQSITA…
espL	STEC	effector	O157 Sakai	MPIINKSASNYVEYISKNNPPYLSKKRDASINLNGKVSDCNGEIIWCRHIASYWSEFFCSNSGKIDYETFSSPQLLSKAIVIQENKGTNNIKGDVYFVENESWGSVIYNLFLQLEKENKSHTSLEVHSPGHAMALGIKIKNDKENKFVINFYDPNQTATHKRVFFCTNNICDIINLTAYDFLSEQCLKCYGLKEDTLSLFVDKTKSNDNNNVFIKKLPDNILQGVVINFAMGAGLREIIKKVYNDTRFTDLTKSQMKILCESKNVNNVPGLLLALQNGHDNVIDEYGTLIKKSNLNKEELIHILSARTLDGTIPGLYQALQNGHAQAIKSYGNLVLDTINKNIDLEYLLSAFKYEAHSSNKYTPGLFSAFQNGHADAIKAYCGVLGNSNLKRGEIIRML…
espM1	STEC	effector	O157 Sakai	MPVNATGVSFSSFGISYHKDNSFRGTIRGKNDEVVKCSMGERSIRFNVNKFSGCILETVSRQSTKDIHGWVSDERTVYPSRVINQEIDNCCLQKNAKISSEERKMVFSLVSKEFELTLDVKAAQSSINHIIIGNASFGKKMDALCDGMSRAVKNSTTDYIANVLADKFYQKHIAPGVDIVKLRNEIPGYMSRVIQG
espM2	STEC	effector	O157 Sakai	MPMNTTGMSFSSFGISCHRENSFRNSFRGKNDEVVKCSIGERTISFSVRKFSGNILETVRRQSTKDIDEWIKDERIVYPSRVINQEIDNYCFQKNAKISTEERQRVFFLVSQENQLTLDVKAAQSSINHVIMGSASFGKKMDALCDGMSRDVKNRTSDTIANLLADKFYQKHIDSDIDIVKLRNDIPDYLMRAIQG
espN	STEC	effector	O157 Sakai	MKITNYILPTSRTHGSFSTIKSWDTMNYIKHLIRHTNDPIFEEQFYKITQSHIDFDKRAKDEKNDTINIYDNFFYSSNDDLDSKIRSMLNNLYEKSLTFRRIINYYVKEINLSDYGFLKCKILPAYAYNYEMENDAPPKILIPIDHNLNFIDAKYNGETYRGNEEFAINLFLQHILHNDIQEQTSIDLYTSIINKELDSNRKSYNNEIFNNFSFDKSVKLNSYNYIADDIEQVIDKGSKVQLEVYNLLSEEKIFEHKIMNNWTRSIKNILTTYLFMSSGAVTARNVQTFSPTINNESRIRLPRALPVGHPYPEEHKASGFSPFMMGGLSGDILPEILTGNGPSIFFNGKHNNQHDGAFGKIIDFTQNGNKISAKDKEIIKRYIFDKINVLIKEYFIRTG…
espO1	STEC	effector	O157 Sakai	MPFSIKNRFSSSQVHYPEISGPIKDKPASKNCILTSTTCNVDSYTVYQKKACSFDMRPPGAGERTPKLKLSVTEMTWLSKTIETEIHNTKE
espO2	STEC	effector	O157 Sakai	MPFSIKSIFSGHTWHQPEISRPIADKSSTKNCILDSTTCNVDGFTVFNRRSCSFDMRPPGSADRTPQLRLSISEVAWMSKIIETETNNTNKS
espV	STEC	effector	E22	MSGTSGSSSDATLATRYAAEHFGKTWAAPGLSQAEGCKAISDLSHHYFRAEGSSPPQSMATGINKVRCDAGMEEKHVNALDIFTHSYPEIYAGVALTIAGAGGNDEQAMYNVTQEAARILHEAETKD
espW	STEC	effector	O157 Sakai	MPKISSVVSSCYHLFSEHQQLSNETTMTNPVSRRIVHKEYGISLKSVPVWLATAKTPLALLNGRHTRSHSFIIAGTPGMGSRSGAQYYAINSDDKRSRIDIDSLFLKKLNNVRNQNKFPIDVKETVIKLQGQKFTCIEDFYKRYNETRLKANTNIQQEQIADEVKSLTYLIPSEKKEMWIYKNNGKDNAKPNLGERDVRMFENISSDDTDKITGRKFSELGEYLYSGNVIKLSQLSIRYLPNISSISLIETKQSLLLHRLYSDEVLQRNGTLIPTPLHEEKSIPADNIKTMLNNIPTYKMLPPFTETQGNCSSGAATFLRKSGAEEKDILACSPRNYGLHHNIKTWDPLVRN
espX	STEC	effector	O157 Sakai	MLPTTNISVNSGVISFESPVDSPSNEDVEVALEKWCAEGEFSENRHEVASKILDVISTNGETLSISEPITTLPDLLPGSLKELVLNGCTELKSINCLPPNLSSLSMVGCSSLEVINCSIPENVINLSLCHCSSLKHIEGSFPEALRNSVYLNGCNSLNESQCQFLAYDVSQGRACLSKAELTADLIWLSANRTGEESAEELNYSGCDLSGLSLVGLNLSSVNFSGAVLDDTDLRMSDLSQAVLENCSFKNSILNECNFCYANLSNCIIRALFENSNFSNSNLKNASFKGSSYIQYPPILNEADLTGAIIIPGMVLSGAILGDVKELFSEKSNTINLGGCYIDLSDIQENILSVLDNYTKSNKSILLTMNTSDDKYNHDKVRAAEELIKKISLDELAAFR…
nleA	STEC	effector	O157 Sakai	MNIQPTIQSGITSQNNQHHQTEQIPSTQIPQSELPLGCQAGFVVNIPDDIQQHAPECGETTALLSLIKDKGLLSGLDEYIAPHLEEGSIGKKTLDMFGLFNVTQMALEIPSSVSGISGKYGVQLNIVKPDIHPTSGNYFLQIFPLHDEIGFNFKDLPGPLKNALSNSNISTTAVSTIASTGTSATTSTVTTEPKDPIPWFGLTAQVVRNHGVELPIVKTENGWKLVGETPLTPDGPKANYTEEWVIRPGEADFKYGASPLQATLGLEFGAHFKWDLDNPNTKYAVLTNAAANALGALGGFAVSRFASTDPMLSPHIGAMVGQAAGHAIQYNTPGLKPDTILWWAGATLGAADLNKAEFEVARFTDYPRIWWHAREGAIFPNKADIEHATGADIRAMEEG…
nleB1	STEC	effector	O157 Sakai	MLSSLNVLQSSFRGKTALSNSTLLQKVSFAGKEYPLEPIDEKTPILFQWFEARPERYEKGEVPILNTKEHPYLSNIINAAKIENERIIGVLVDGNFTYEQKKEFLSLENEYQNIKIIYRADVDFSMYDKKLSDIYLENIHKQESYPASERDNYLLGLLREELKNIPEGKDSLIESYAEKREHTWFDFFRNLAMLKAGSLFTETGKTGCHNISPCSGCIYLDADMIITDKLGVLYAPDGIAVHVDCNDEIKSLENGAIVVNRSNHPALLAGLDIMKSKVDAHPYYDGLGKGIKRHFNYSSLHDYNAFCDFIEFKHENIIPNTSMYTCSSW
nleB2	STEC	effector	O157 Sakai	MLSPIRTTFHNSVNIVQSSPCQTVSFAGKEYELKVIDEKTPILFQWFEPNPERYKKDEVPIVNTKQHPYLDNVTNAARIESDRMIGIFVDGDFSVNQKTAFSKLERDFENVMIIYREDVDFSMYDRKLSDIYHDIICEQRLRTEDKRDEYLLNLLEKELREISKAQDSLISMYAKKRNHAWFDFFRNLALLKAGEIFRCTYNTKNHGISFGEGCIYLDMDMILTGKLGTIYAPDGISMHVDRRNDSVNIENSAIIVNRSNHPALLEGLSFMHSKVDAHPYYDGLGKGVKKYFNFTPLHNYNHFCDFIEFNHPNIIMNTSQYTCSSW
nleC	STEC	effector	O157 Sakai	MKIPSLQSNFNFSAPAGYSAPIAPNRAENAYADYVLDIGKRIPLSAADLSNVYESVIRAVHDSRSRLIDQHTVDMIGNTVLDALSRSQTFRDAVSYGIHNEKVHIGCIKYRNEYELNEESSVKIDDIQSLTCNELYEYDVGQEPIFPICEAGENDNEEPYVSFSVAPDTDSYEMPSWQEGLIHEIIHHVTGSSDPSGDSNIELGPTEILARRVAQELGWSVPDFKGYAEPEREAHLRLRNLNALRQAAMRHEENERAFFERLGTISDRYEASPDFTEYSAVSNIGYGFIQQHDFPGLAINDNLQDANQIQLYHGAPYIFTFGDVDKHNQQ
nleD	STEC	effector	O157 Sakai	MRPTSLNLVLHQSSRSSSMSDTDIESLVKASSVQWIKNNPQLRFQGTDHNIYQQIEAALDKIGSTETGRVLLNAIESISRLKSETVVIHLNSSRLGVMAHRDIDAENHRGTGSDFHCNLNAVEYPCGEGISVVDFHATIVFHELLHVFHNLNGERLKVESSRAESQKYSPLLLEEARTVGLGAFSEEVLSENKFHEEIGMPRRTSYPHDSALIHDDNTVSLGFQQVRLHPLL
nleE	STEC	effector	O157 Sakai	MINPVTNTQGVSPINTKYAEHVVKNIYPEIKHDYFNESPNIYDKKYISGITRGVAELKQEEFVNEKARRFSYMKTMYSVCPEAFEPISRNEASTPEGSWLTVISGKRPMGQFSVDSLYNPDLHALCELPDICCKIFPKENNDFLYIVVVYRNDSPLGEQRANRFIELYNIKRDIMQELNYELPELKAVKSEMIIAREMGEIFSYMPGEIDSYMKYINNKLSKIE
nleF	STEC	effector	O157 Sakai	MLPTSGSSANLYSWMYVSGRGNPSTPESVSELNHNHFLSPELQDKLDVMVSIYSCARNNNELEEIFQELSAFVSGLMDKRNSVFEVRNENTDEVVGALRAGMTIEDRDSYIRDLFFLHSLKVKIEESRQGKEDSKCKVYNLLCPHHSSELYGDLRAMKCLVEGCSDDFNPFDIIRVPDLTYNKGSLQCG
nleG1	STEC	effector	O157 Sakai	MPVILNFSSERVLSESELEALRHVGRVSQSEQLVVRGRTMRLHHISFMDSFSVEPVSGGLLDRLSARGHRLLAENLEIQLNRGHTFLQAFRLYMEQSRATPCTRQNVSSAIQNKINSHAFTVSHQDFSCHEQHLNCPITLCIPETGVFVRNAKNSEICSLYDHNALTELIRRNAPHPLSREPFVPEMIVSKDECHFNLIEQYFCILATQNICTRI
nleG2	STEC	effector	O157 Sakai	MPLTSDIRSHSFNLGVEVVRARIVANGRGDITVGGETVSIVYDSTNGRFSSSGGNGGLLSELLLLGFNSGPRALGERMLSMLSDSGEAQSQESIQNKISQCKFSVCPERLQCPLEAIQCPITLEQPEKGIFVKNSDGSDVCTLFDAAAFSRLVGEGLPHPLTREPITASIIVKHEECIYDDTRGNFVIKGN
nleG3	STEC	effector	O157 Sakai	MPVTTLSIPSISQLSPAGVQSLQDAARLESGIRISIGSGQYSVHYVQLLDGFSVEPVRGGLLDRLLGREHRMERRAVALERQLNGGVDFLSSVNNYFQSVMAEHRENKTSNKILMEKINSCLFRPDSNHFSCPESFLTCPITLDTPETGVFMRNSRGAEICSLYDKDALVQLVETGGAHPLSREPITESMIMRKDECHFDTKREAFCCK
nleG4	STEC	effector	O157 Sakai	MPVDLTPYILPGVSFLSDIPQETLSEIRNQTIRGEAQIRLGELMVSIRPMQVNGYFMGSLNQDGLSNDNIQIGLQYIEHIERTLNHGSLTSREVTVLREIEMLENMDLLSNYQLEELLDKIEVCAFNVEHAQLQVPESLRTCPVTLCEPEDGVFMRNSMNSNVCMLYDKMALIHLVKTRAAHPLSRESIAVSMIVGRDNCAFDPDRGNFVLKN
nleG5	STEC	effector	O157 Sakai	MPVDLTPYILPGVSFLSDIPQETLSEIRNQTIRGEAQVRLGELMVSIRPMQVNGYFMGSLNQDGLSNDNIQIGLQYIEHIERTLNHGSLTSREVTVLREIEMLENMELLSNYQLEELLDKIEVCAFNVEHAQLQVPESLRTCPVTLCEPEDGVFMRNSMNSNVCMLYDKMSLIYLVKTRAAHPLSRESIAVSMIVGRDNCAFDSDRGNFVLKN
nleG6	STEC	effector	O157 Sakai	MPVTTLSIPSISQLSPARVQSLQDAARLESGIRISIGSGQYSVHYVQLLDGFSVEPVRGGLLDRLLGREHRMDRRAVALERQLNGGVDFLSSVNNYFQSVMAEHRENKTGNKILMEKINSCVFGTDSNHFSCPESFLTCPITLDTPETGVFMRNSRGAEICSLYDKDALVQLVETGGTHPLSREPITESMIMRKDECHFDAKREAFCCK
nleG7	STEC	effector	O157 Sakai	MPLTSDIRSHSFNLGVEVVRARIVANGRGDITVGGETVSIVYDSTNGRFSSSGGNGGLLSELLLLGFNSGPRALGERMLSMLSDSGEAQSQESIQNKISQCKFSVCPERLQCPLEAIQCPITLEQPEKGIFVKNSDGSDVCTLFDAAAFSRLVGEGLPHPLTREPITASIIVKHEECIYDDTRGNFIIKGN
nleG8	STEC	effector	O157 Sakai	MPVILNFSNGSVLPENELEALRHIARSNQNDTITIGGRNMRLHYIQFMDGFSVEPILGGLWDHLGAREAHHLADRLTRQLNGGNTFLQAYSLYLEQRQAAPLVQESVIKTLLDRINSNAFPVSLQDFSCTEEHLNCPITLHIPETGVFVRNARNSEICALYDQEALTELILRNALHPLSRDPFAPEMIISKDKCHFNITKQCFYALPIYPLQQNSI
nleH1	STEC	effector	O157 Sakai	MLSPYSVNLGCSWNSLTRNLTSPDNRVLSSVRDAAVHSDNGAQVKVGNRTYRVVATDNKFCVTRESHSGCFTNLLHRLGWPKGEISRKIEVMLNASPVSAAMERGIVHSNRPDLPPVDYAPPELPSVDYNRLSVPGNVIGKGGNAVVYEDAEDATKVLKMFTTSQSNEEVTSEVRCFNQYYGAGSAEKIYGNNGDIIGIRMDKINGESLLNISSLPAQAEHAIYDMFDRLEQKGILFVDTTETNVLYDRAKNEFNPIDISSYNVSDRSWSESQIMQSYHGGKQDLISVVLSKI
nleH2	STEC	effector	O157 Sakai	MLSPSSINLGCSWNSLTRNLTSPDNRVLSSVRDAAVHSDSGTQVTVGNRTYRVVVTDNKFCVTRESHSGCFTNLLHRLGWPKGEISRKIEAMLNTSPVSTTIERGSVHSNRPDLPPVDYAQPELPPADYTQSELPRVSNNKSPVPGNVIGKGGNAVVYEDMEDTTKVLKMFTISQSHEEVTSEVRCFNQYYGSGSAEKIYNDNGNVIGIRMNKINGESLLDIPSLPAQAEQAIYDMFDRLEKKGILFVDTTETNVLYDRMRNEFNPIDISSYNVSDISWSEHQVMQSYHGGKLDLISVVLSKI
tccP	STEC	effector	O157 Sakai	MINNVSSLFPTVNRNITAVYKKSSFSVSPQKITLNPVKISSPFSPSSSSISATTLFRAPNAHSASFHRQSTAESSLHQQLPNVRQRLIQHLAEHGIKPARSMAEHIPPAPNWPAPPPPVQNEQSRPLPDVAQRLVQHLAEHGIQPARNMAEHIPPAPNWPAPPLPVQNEQSRPLPDVAQRLVQHLAEHGIQPARSMAEHIPPAPNWPAPPPPVQNEQSRPLPDVAQRLMQHLAEHGIQPARNMAEHIPPAPNWPAPTPPVQNEQSRPLPDVAQRLMQHLAEHGIQPARNMAEHIPPAPNWPAPTPPVQNEQSRPLPDVAQRLMQHLAEHGINTSKRS
ibe	STEC	effector	O157 Sakai	MFSIRTLLPISASVSVPTKQSQSIPITLAGRTIEKAQEKEGLLVFLGMKSVNDYTLNILGQNVSRVTTGKKPYDLLFLNDATKQDFDKRKMEFTYPGANKSHLQSSNSDVVAAAAISITATEMKTILPDDLTLGKYNKIYLSGHGSAGLPLLKCGDEFLSPSDIVDRIVQHNLHEIDDIRLTSCNSANIIKNKDFSPDEIEKSANMNNGWLARALFGQKRSLAEHVYAEFERRGINVSISGYHGTGVFYVPEHGKPTTHLRSTTVPATPEHTVRRSDYRATLGRTQPIDIE
ospG	STEC	effector	O157 Sakai	MKIISTVIQTPFPFENNNSHTGVVTEPILGKLIGQGSTAEIFEDMNDSSALYKKYDLVGNQHNEVLEMARQESALFNTFYGDDASVVIQYGGDVYLRMLRVPGIPLSDIDTADIPDNLESLYLQLICKLNELSIIHYDLNTGNMLYDKESNSLFPIDFRNIYSEYYSATKNDKEIIDRRLQMRTNDFYSLLNRKYL

## Sheet: Supple Table S8
Supplemental table S8. Pairwise co-occurrence matrix used for the network analysis.
	stx	LEE	cif	espJ	espK	espL	espM	espN	espO	espV	espW	espX	nleA	nleB	nleC	nleD	nleE	nleF	nleG	nleH	tccP	ibe	ospG	pch	ehxA	espP	efa1	stcE	etpD	katP	ecf1	bfpA	eibG	espC	hes	ihaA	lpxR	paa	saa	sab	subA	ureC	eltIIaA	sta	tia	aafA	aatA	aggR	ipaH
stx	0	19	12	18	13	13	18	11	17	11	11	13	17	18	13	11	18	15	19	18	12	16	3	19	88	85	12	6	6	11	22	0	0	0	67	72	15	18	68	11	41	18	0	12	24	0	0	0	0
LEE	0	0	70	84	36	64	72	23	60	45	46	28	69	90	43	34	74	59	96	94	47	74	25	82	63	55	21	17	17	13	65	0	0	0	0	20	68	57	0	0	0	39	0	7	0	0	0	0	0
cif	0	0	0	68	23	47	51	14	39	21	40	17	49	62	26	22	54	39	70	68	19	47	14	50	36	31	16	3	3	10	36	0	0	0	0	15	63	36	0	0	0	18	0	2	0	0	0	0	0
espJ	0	0	0	0	31	59	66	21	53	34	43	25	60	77	34	25	67	53	84	82	35	59	17	65	51	46	19	11	11	13	51	0	0	0	0	17	66	50	0	0	0	32	0	3	0	0	0	0	0
espK	0	0	0	0	0	28	32	23	34	24	15	28	30	33	21	14	31	27	34	35	17	35	8	36	34	28	17	7	7	13	35	0	0	0	0	16	25	25	0	0	0	25	0	3	0	0	0	0	0
espL	0	0	0	0	0	0	56	21	47	28	34	24	50	64	29	27	63	46	63	64	29	49	15	55	45	37	17	11	11	11	45	0	0	0	0	17	51	44	0	0	0	29	0	0	0	0	0	0	0
espM	0	0	0	0	0	0	0	22	56	34	46	27	64	71	33	30	61	54	71	71	37	60	17	67	53	45	20	14	14	13	53	0	0	0	0	20	54	53	0	0	0	34	0	0	0	0	0	0	0
espN	0	0	0	0	0	0	0	0	22	14	10	23	22	23	13	9	22	18	22	23	10	22	4	23	22	19	13	4	4	10	23	0	0	0	0	12	17	19	0	0	0	19	0	0	0	0	0	0	0
espO	0	0	0	0	0	0	0	0	0	34	33	26	54	56	36	29	52	51	59	58	36	57	19	59	54	47	20	12	12	13	54	0	0	0	0	20	42	51	0	0	0	34	0	3	0	0	0	0	0
espV	0	0	0	0	0	0	0	0	0	0	10	19	31	36	24	10	32	30	39	38	28	42	10	44	38	32	12	10	10	6	39	0	0	0	0	10	20	31	0	0	0	28	0	7	0	0	0	0	0
espW	0	0	0	0	0	0	0	0	0	0	0	12	42	45	23	24	37	33	46	46	23	37	12	41	28	25	12	6	6	7	28	0	0	0	0	14	42	31	0	0	0	16	0	0	0	0	0	0	0
espX	0	0	0	0	0	0	0	0	0	0	0	0	27	28	16	13	27	23	27	28	13	27	4	28	26	21	15	6	6	11	27	0	0	0	0	14	21	22	0	0	0	22	0	0	0	0	0	0	0
nleA	0	0	0	0	0	0	0	0	0	0	0	0	0	66	33	33	54	52	69	67	36	59	17	63	50	42	19	11	11	12	50	0	0	0	0	19	52	53	0	0	0	32	0	0	0	0	0	0	0
nleB	0	0	0	0	0	0	0	0	0	0	0	0	0	0	36	32	74	57	85	87	40	64	19	72	55	47	21	17	17	13	57	0	0	0	0	20	64	54	0	0	0	36	0	0	0	0	0	0	0
nleC	0	0	0	0	0	0	0	0	0	0	0	0	0	0	0	22	32	31	39	39	27	39	14	42	38	34	17	7	7	9	38	0	0	0	0	14	29	32	0	0	0	25	0	6	0	0	0	0	0
nleD	0	0	0	0	0	0	0	0	0	0	0	0	0	0	0	0	30	28	33	32	23	30	14	33	29	24	10	7	7	5	29	0	0	0	0	10	26	26	0	0	0	15	0	0	0	0	0	0	0
nleE	0	0	0	0	0	0	0	0	0	0	0	0	0	0	0	0	0	52	71	71	33	54	17	61	51	43	20	13	13	13	51	0	0	0	0	20	56	49	0	0	0	33	0	0	0	0	0	0	0
nleF	0	0	0	0	0	0	0	0	0	0	0	0	0	0	0	0	0	0	58	58	34	52	18	57	47	40	15	12	12	12	48	0	0	0	0	15	41	47	0	0	0	29	0	2	0	0	0	0	0
nleG	0	0	0	0	0	0	0	0	0	0	0	0	0	0	0	0	0	0	0	90	42	68	21	75	59	51	21	15	15	13	59	0	0	0	0	20	68	55	0	0	0	37	0	5	0	0	0	0	0
nleH	0	0	0	0	0	0	0	0	0	0	0	0	0	0	0	0	0	0	0	0	40	66	20	74	56	48	21	16	16	13	58	0	0	0	0	20	68	54	0	0	0	36	0	3	0	0	0	0	0
tccP	0	0	0	0	0	0	0	0	0	0	0	0	0	0	0	0	0	0	0	0	0	43	19	47	41	39	9	12	12	3	42	0	0	0	0	7	23	34	0	0	0	25	0	5	0	0	0	0	0
ibe	0	0	0	0	0	0	0	0	0	0	0	0	0	0	0	0	0	0	0	0	0	0	24	73	60	52	18	13	13	12	62	0	0	0	0	19	46	52	0	0	0	37	0	7	0	0	0	0	0
ospG	0	0	0	0	0	0	0	0	0	0	0	0	0	0	0	0	0	0	0	0	0	0	0	25	24	23	0	3	3	2	25	0	0	0	0	0	14	19	0	0	0	4	0	4	0	0	0	0	0
pch	0	0	0	0	0	0	0	0	0	0	0	0	0	0	0	0	0	0	0	0	0	0	0	0	63	55	21	16	16	13	65	0	0	0	0	19	51	55	0	0	0	39	0	7	0	0	0	0	0
ehxA	0	0	0	0	0	0	0	0	0	0	0	0	0	0	0	0	0	0	0	0	0	0	0	0	0	113	20	14	14	13	63	0	0	0	35	53	37	54	65	11	42	39	0	19	0	0	0	0	0
espP	0	0	0	0	0	0	0	0	0	0	0	0	0	0	0	0	0	0	0	0	0	0	0	0	0	0	18	9	9	13	57	0	0	0	40	53	32	41	64	11	42	34	0	7	3	0	0	0	0
efa1	0	0	0	0	0	0	0	0	0	0	0	0	0	0	0	0	0	0	0	0	0	0	0	0	0	0	0	4	4	9	20	0	0	0	0	17	19	16	0	0	0	20	0	0	0	0	0	0	0
stcE	0	0	0	0	0	0	0	0	0	0	0	0	0	0	0	0	0	0	0	0	0	0	0	0	0	0	0	0	17	2	16	0	0	0	0	5	4	11	0	0	0	10	0	0	0	0	0	0	0
etpD	0	0	0	0	0	0	0	0	0	0	0	0	0	0	0	0	0	0	0	0	0	0	0	0	0	0	0	0	0	2	16	0	0	0	0	5	4	11	0	0	0	10	0	0	0	0	0	0	0
katP	0	0	0	0	0	0	0	0	0	0	0	0	0	0	0	0	0	0	0	0	0	0	0	0	0	0	0	0	0	0	17	0	0	0	0	11	13	12	0	0	0	10	0	0	0	0	0	0	0
ecf1	0	0	0	0	0	0	0	0	0	0	0	0	0	0	0	0	0	0	0	0	0	0	0	0	0	0	0	0	0	0	0	0	0	0	0	20	37	48	0	0	0	38	0	7	0	0	0	0	0
bfpA	0	0	0	0	0	0	0	0	0	0	0	0	0	0	0	0	0	0	0	0	0	0	0	0	0	0	0	0	0	0	0	0	0	0	0	0	0	0	0	0	0	0	0	0	0	0	0	0	0
eibG	0	0	0	0	0	0	0	0	0	0	0	0	0	0	0	0	0	0	0	0	0	0	0	0	0	0	0	0	0	0	0	0	0	0	0	0	0	0	0	0	0	0	0	0	0	0	0	0	0
espC	0	0	0	0	0	0	0	0	0	0	0	0	0	0	0	0	0	0	0	0	0	0	0	0	0	0	0	0	0	0	0	0	0	0	0	0	0	0	0	0	0	0	0	0	0	0	0	0	0
hes	0	0	0	0	0	0	0	0	0	0	0	0	0	0	0	0	0	0	0	0	0	0	0	0	0	0	0	0	0	0	0	0	0	0	0	46	0	0	38	4	24	0	0	0	20	0	0	0	0
ihaA	0	0	0	0	0	0	0	0	0	0	0	0	0	0	0	0	0	0	0	0	0	0	0	0	0	0	0	0	0	0	0	0	0	0	0	0	17	17	35	5	28	23	0	0	20	0	3	0	0
lpxR	0	0	0	0	0	0	0	0	0	0	0	0	0	0	0	0	0	0	0	0	0	0	0	0	0	0	0	0	0	0	0	0	0	0	0	0	0	40	0	0	0	20	0	0	0	0	0	0	0
paa	0	0	0	0	0	0	0	0	0	0	0	0	0	0	0	0	0	0	0	0	0	0	0	0	0	0	0	0	0	0	0	0	0	0	0	0	0	0	0	0	0	33	2	7	0	0	0	0	0
saa	0	0	0	0	0	0	0	0	0	0	0	0	0	0	0	0	0	0	0	0	0	0	0	0	0	0	0	0	0	0	0	0	0	0	0	0	0	0	0	11	42	0	0	0	0	0	0	0	0
sab	0	0	0	0	0	0	0	0	0	0	0	0	0	0	0	0	0	0	0	0	0	0	0	0	0	0	0	0	0	0	0	0	0	0	0	0	0	0	0	0	11	0	0	0	0	0	0	0	0
subA	0	0	0	0	0	0	0	0	0	0	0	0	0	0	0	0	0	0	0	0	0	0	0	0	0	0	0	0	0	0	0	0	0	0	0	0	0	0	0	0	0	0	0	0	0	0	0	0	0
ureC	0	0	0	0	0	0	0	0	0	0	0	0	0	0	0	0	0	0	0	0	0	0	0	0	0	0	0	0	0	0	0	0	0	0	0	0	0	0	0	0	0	0	2	4	3	0	0	0	0
eltIIaA	0	0	0	0	0	0	0	0	0	0	0	0	0	0	0	0	0	0	0	0	0	0	0	0	0	0	0	0	0	0	0	0	0	0	0	0	0	0	0	0	0	0	0	2	0	0	0	0	0
sta	0	0	0	0	0	0	0	0	0	0	0	0	0	0	0	0	0	0	0	0	0	0	0	0	0	0	0	0	0	0	0	0	0	0	0	0	0	0	0	0	0	0	0	0	2	0	0	0	0
tia	0	0	0	0	0	0	0	0	0	0	0	0	0	0	0	0	0	0	0	0	0	0	0	0	0	0	0	0	0	0	0	0	0	0	0	0	0	0	0	0	0	0	0	0	0	0	0	0	0
aafA	0	0	0	0	0	0	0	0	0	0	0	0	0	0	0	0	0	0	0	0	0	0	0	0	0	0	0	0	0	0	0	0	0	0	0	0	0	0	0	0	0	0	0	0	0	0	0	0	0
aatA	0	0	0	0	0	0	0	0	0	0	0	0	0	0	0	0	0	0	0	0	0	0	0	0	0	0	0	0	0	0	0	0	0	0	0	0	0	0	0	0	0	0	0	0	0	0	0	2	0
aggR	0	0	0	0	0	0	0	0	0	0	0	0	0	0	0	0	0	0	0	0	0	0	0	0	0	0	0	0	0	0	0	0	0	0	0	0	0	0	0	0	0	0	0	0	0	0	0	0	0
ipaH	0	0	0	0	0	0	0	0	0	0	0	0	0	0	0	0	0	0	0	0	0	0	0	0	0	0	0	0	0	0	0	0	0	0	0	0	0	0	0	0	0	0	0	0	0	0	0	0	0
invE	0	0	0	0	0	0	0	0	0	0	0	0	0	0	0	0	0	0	0	0	0	0	0	0	0	0	0	0	0	0	0	0	0	0	0	0	0	0	0	0	0	0	0	0	0	0	0	0	0
virA	0	0	0	0	0	0	0	0	0	0	0	0	0	0	0	0	0	0	0	0	0	0	0	0	0	0	0	0	0	0	0	0	0	0	0	0	0	0	0	0	0	0	0	0	0	0	0	0	0
hlyA	0	0	0	0	0	0	0	0	0	0	0	0	0	0	0	0	0	0	0	0	0	0	0	0	0	0	0	0	0	0	0	0	0	0	0	0	0	0	0	0	0	0	0	0	0	0	0	0	0
papA	0	0	0	0	0	0	0	0	0	0	0	0	0	0	0	0	0	0	0	0	0	0	0	0	0	0	0	0	0	0	0	0	0	0	0	0	0	0	0	0	0	0	0	0	0	0	0	0	0
pic	0	0	0	0	0	0	0	0	0	0	0	0	0	0	0	0	0	0	0	0	0	0	0	0	0	0	0	0	0	0	0	0	0	0	0	0	0	0	0	0	0	0	0	0	0	0	0	0	0
sfaA	0	0	0	0	0	0	0	0	0	0	0	0	0	0	0	0	0	0	0	0	0	0	0	0	0	0	0	0	0	0	0	0	0	0	0	0	0	0	0	0	0	0	0	0	0	0	0	0	0
cdt-IA	0	0	0	0	0	0	0	0	0	0	0	0	0	0	0	0	0	0	0	0	0	0	0	0	0	0	0	0	0	0	0	0	0	0	0	0	0	0	0	0	0	0	0	0	0	0	0	0	0
cdt-IIIA	0	0	0	0	0	0	0	0	0	0	0	0	0	0	0	0	0	0	0	0	0	0	0	0	0	0	0	0	0	0	0	0	0	0	0	0	0	0	0	0	0	0	0	0	0	0	0	0	0
cdt-IVA	0	0	0	0	0	0	0	0	0	0	0	0	0	0	0	0	0	0	0	0	0	0	0	0	0	0	0	0	0	0	0	0	0	0	0	0	0	0	0	0	0	0	0	0	0	0	0	0	0
cdt-VA	0	0	0	0	0	0	0	0	0	0	0	0	0	0	0	0	0	0	0	0	0	0	0	0	0	0	0	0	0	0	0	0	0	0	0	0	0	0	0	0	0	0	0	0	0	0	0	0	0
cnf1	0	0	0	0	0	0	0	0	0	0	0	0	0	0	0	0	0	0	0	0	0	0	0	0	0	0	0	0	0	0	0	0	0	0	0	0	0	0	0	0	0	0	0	0	0	0	0	0	0
cnf2	0	0	0	0	0	0	0	0	0	0	0	0	0	0	0	0	0	0	0	0	0	0	0	0	0	0	0	0	0	0	0	0	0	0	0	0	0	0	0	0	0	0	0	0	0	0	0	0	0
[truncated: 12 more columns]

## Sheet: Supple Table S9
Supplemental table S9. Phylogroupes B1 (>90 sensitivity, >90 specificity) and B2 (<10 sensitivity, <10 specificity) associated genes identified in the comparison of B1 (n=502) and B2 (n=189) strains.
Locus_tag (SE11 or SE15)	Gene	Annotation	present in B1	present in B2	absent in B1	absent in B2	Sensitivity	Specificity	Naive_p	Bonferroni_p	Benjamini_H_p	Bivine (B)- and human (H) lineage-associated genes/homologues that are listed in Figure 5
ECSE_0019	yehB	fimbrial usher protein	500	0	2	189	99.6016	100	4.48867e-171	1.04281e-166	7.50222e-169
ECSE_0070	setA	broad specificity sugar efflux system SetA	502	0	0	189	100	100	2.47378e-175	5.74709e-171	6.4574e-173	B
ECSE_0214		type VI secretion system effector Hcp1 family protein	460	0	42	189	91.6335	100	6.19357e-129	1.43889e-124	3.81669e-127
ECSE_0246	yafQ	mRNA interferase toxin of toxin-antitoxin pair YafQ/DinJ	457	1	45	188	91.0359	99.4709	3.40569e-124	7.91209e-120	1.92978e-122
ECSE_0247	dinJ	antitoxin of YafQ-DinJ toxin-antitoxin system	460	1	42	188	91.6335	99.4709	2.33723e-126	5.42985e-122	1.38517e-124
ECSE_0249	hicB	DNA repair protein	482	2	20	187	96.0159	98.9418	9.6123e-143	2.23313e-138	6.6265e-141
ECSE_0250	hicA	HicA-like protein	482	2	20	187	96.0159	98.9418	9.6123e-143	2.23313e-138	6.6265e-141
ECSE_0300	yagP	transcriptional regulator LYSR-type	488	0	14	189	97.2112	100	3.62033e-154	8.41076e-150	3.22251e-152
ECSE_0301	paoD	moco insertion factor for PaoABC aldehyde oxidoreductase	490	0	12	189	97.6096	100	1.60684e-156	3.73301e-152	1.52992e-154
ECSE_0302	paoC	moco-containing subunit of PaoABC aldehyde oxidoreductase	490	0	12	189	97.6096	100	1.60684e-156	3.73301e-152	1.52992e-154
ECSE_0303	paoB	FAD-containing subunit of PaoABC aldehyde oxidoreductase	491	0	11	189	97.8088	100	9.59307e-158	2.22866e-153	9.2861e-156
ECSE_0304	yagT	xanthine dehydrogenase	491	0	11	189	97.8088	100	9.59307e-158	2.22866e-153	9.2861e-156
ECSE_0351	yahL	hypothetical protein	499	2	3	187	99.4024	98.9418	3.48649e-164	8.09982e-160	4.21865e-162
ECSE_0363	cynR	transcriptional activator of cyn operon	497	0	5	189	99.004	100	5.37808e-166	1.24944e-161	7.13963e-164
ECSE_0364	cynT	carbonic anhydrase	501	0	1	189	99.8008	100	4.70018e-173	1.09195e-168	1.01106e-170
ECSE_0365	cynS	cyanate aminohydrolase	500	0	2	189	99.6016	100	4.48867e-171	1.04281e-166	7.50222e-169
ECSE_0367	cynX	cyanate transporter	500	0	2	189	99.6016	100	4.48867e-171	1.04281e-166	7.50222e-169
ECSE_0555	sfmA	type-1 fimbrial protein subunit A	493	0	9	189	98.2072	100	2.65135e-160	6.15962e-156	2.7746e-158
ECSE_0556	sfmC	outer membrane usher protein FimD	501	0	1	189	99.8008	100	4.70018e-173	1.09195e-168	1.01106e-170
ECSE_0558	sfmH	fimbrial-like adhesin protein	500	0	2	189	99.6016	100	4.48867e-171	1.04281e-166	7.50222e-169
ECSE_0559	sfmF	fimbrial protein	485	0	17	189	96.6135	100	7.64434e-151	1.77593e-146	6.52916e-149
ECSE_0560	sfmZ	response regulator	477	0	25	189	95.0199	100	6.75419e-143	1.56913e-138	4.68398e-141
ECSE_0622	envY	porin thermoregulatory transcriptional activator	499	0	3	189	99.4024	100	2.87275e-169	6.67398e-165	4.30579e-167
ECSE_0676	ybdR	Zn-dependent NAD(P)-binding oxidoreductase	502	0	0	189	100	100	2.47378e-175	5.74709e-171	6.4574e-173	B
ECSE_0714	ybeR	hypothetical protein	501	0	1	189	99.8008	100	4.70018e-173	1.09195e-168	1.01106e-170
ECSE_0740		hypothetical protein	473	0	29	189	94.2231	100	2.60309e-139	6.04749e-135	1.69873e-137
ECSE_0762	rhsD	type IV secretion protein Rhs	486	0	16	189	96.8127	100	6.30843e-152	1.46557e-147	5.48904e-150
ECSE_0776	ybgP	periplasmic pilin chaperone	502	0	0	189	100	100	2.47378e-175	5.74709e-171	6.4574e-173	B
ECSE_0777	ybgQ	outer membrane protein	502	0	0	189	100	100	2.47378e-175	5.74709e-171	6.4574e-173
ECSE_0778	ybgD	fimbrial-like adhesin protein	501	0	1	189	99.8008	100	4.70018e-173	1.09195e-168	1.01106e-170
ECSE_0879	ybiU	hypothetical protein	502	3	0	186	100	98.4127	5.27837e-168	1.22627e-163	7.66419e-166
ECSE_0958	ycaM	transporter	502	0	0	189	100	100	2.47378e-175	5.74709e-171	6.4574e-173
ECSE_0959	ycaN	LysR family transcriptional regulator	502	0	0	189	100	100	2.47378e-175	5.74709e-171	6.4574e-173	B
ECSE_0960	ycaK	NAD(P)H-dependent oxidoreductase	500	0	2	189	99.6016	100	4.48867e-171	1.04281e-166	7.50222e-169	B
ECSE_0999	ycbQ	fimbrial-like adhesin protein	493	0	9	189	98.2072	100	2.65135e-160	6.15962e-156	2.7746e-158
ECSE_1000	elfD	periplasmic pilin chaperone	501	0	1	189	99.8008	100	4.70018e-173	1.09195e-168	1.01106e-170	B
ECSE_1001	fimD	outer membrane usher protein FimD	502	0	0	189	100	100	2.47378e-175	5.74709e-171	6.4574e-173	B
ECSE_1002	elfG	fimbrial-like adhesin protein	502	0	0	189	100	100	2.47378e-175	5.74709e-171	6.4574e-173	B
ECSE_1004	ycbV	fimbrial-like adhesin protein	502	0	0	189	100	100	2.47378e-175	5.74709e-171	6.4574e-173
ECSE_1005	ycbF	periplasmic pilin chaperone	502	0	0	189	100	100	2.47378e-175	5.74709e-171	6.4574e-173	B
ECSE_1043	wzc	colanic acid production tyrosine-protein kinase	501	8	1	181	99.8008	95.7672	4.76084e-156	1.10604e-151	4.47789e-154	B
ECSE_1044	etp	O-antigen capsule forming protein-tyrosine-phosphatase	501	18	1	171	99.8008	90.4762	3.68264e-140	8.5555e-136	2.43746e-138	B
ECSE_1045	gfcE	O-antigen capsule outer membrane auxillary protein export channel	500	8	2	181	99.6016	95.7672	4.28808e-154	9.96207e-150	3.78786e-152	B
ECSE_1046	gfcD	O-antigen capsule production periplasmic protein	500	8	2	181	99.6016	95.7672	4.28808e-154	9.96207e-150	3.78786e-152	B
ECSE_1047	gfcC	O-antigen capsule production periplasmic protein	495	8	7	181	98.6056	95.7672	3.49906e-146	8.12902e-142	2.70067e-144	B
ECSE_1048	gfcB	O-antigen capsule production lipoprotein	495	8	7	181	98.6056	95.7672	3.49906e-146	8.12902e-142	2.70067e-144	B
ECSE_1049	gfcA	O-antigen capsule production threonine-rich inner membrane protein	485	8	17	181	96.6135	95.7672	3.10298e-134	7.20885e-130	1.96963e-132	B
ECSE_1063	yccE	hypothetical protein	485	0	17	189	96.6135	100	7.64434e-151	1.77593e-146	6.52916e-149
ECSE_1188	ymfA	inner membrane protein	489	0	13	189	97.4104	100	2.49678e-155	5.80052e-151	2.32953e-153
ECSE_1212	ymgF	inner membrane division septum protein	492	6	10	183	98.008	96.8254	7.93247e-146	1.84287e-141	6.00284e-144
ECSE_1244	ycgY	hypothetical protein	501	0	1	189	99.8008	100	4.70018e-173	1.09195e-168	1.01106e-170
ECSE_1251	ycgV	adhesin	501	0	1	189	99.8008	100	4.70018e-173	1.09195e-168	1.01106e-170	B
ECSE_1341	ycjD	hypothetical protein	494	0	8	189	98.4064	100	1.20516e-161	2.79983e-157	1.30833e-159
ECSE_1348	puuP	putrescine importer	502	0	0	189	100	100	2.47378e-175	5.74709e-171	6.4574e-173
ECSE_1349	puuA	glutamate--putrescine ligase	502	0	0	189	100	100	2.47378e-175	5.74709e-171	6.4574e-173
ECSE_1350	puuD	gamma-glutamyl-gamma-aminobutyrate hydrolase	502	0	0	189	100	100	2.47378e-175	5.74709e-171	6.4574e-173
ECSE_1351	puuR	putrescine inducible repressor for the divergent puu operons	502	0	0	189	100	100	2.47378e-175	5.74709e-171	6.4574e-173
ECSE_1352	puuC	aldehyde dehydrogenase	502	0	0	189	100	100	2.47378e-175	5.74709e-171	6.4574e-173
ECSE_1353	puuB	gamma-glutamylputrescine oxidoreductase	501	0	1	189	99.8008	100	4.70018e-173	1.09195e-168	1.01106e-170
ECSE_1354	puuE	4-aminobutyrate aminotransferase	500	0	2	189	99.6016	100	4.48867e-171	1.04281e-166	7.50222e-169
ECSE_1390	abgT	aminobenzoyl-glutamate transport protein	493	6	9	183	98.2072	96.8254	4.15983e-147	9.66412e-143	3.26491e-145
ECSE_1391	abgB	aminobenzoyl-glutamate utilization protein B	493	6	9	183	98.2072	96.8254	4.15983e-147	9.66412e-143	3.26491e-145
ECSE_1392	abgA	aminobenzoyl-glutamate utilization protein A	493	6	9	183	98.2072	96.8254	4.15983e-147	9.66412e-143	3.26491e-145
ECSE_1393	abgR	transcriptional regulator of abgABT operon	492	6	10	183	98.008	96.8254	7.93247e-146	1.84287e-141	6.00284e-144
ECSE_1470	feaB	phenylacetaldehyde dehydrogenase	500	0	2	189	99.6016	100	4.48867e-171	1.04281e-166	7.50222e-169	B
ECSE_1471	tynA	tyramine oxidase	500	0	2	189	99.6016	100	4.48867e-171	1.04281e-166	7.50222e-169	B
ECSE_1472	paaZ	oxepin-CoA hydrolase and 3-oxo-5,6-dehydrosuberyl-CoA semialdehyde dehydrogenase	500	0	2	189	99.6016	100	4.48867e-171	1.04281e-166	7.50222e-169	B
ECSE_1473	paaA	1,2-phenylacetyl-CoA epoxidase subunit A	500	0	2	189	99.6016	100	4.48867e-171	1.04281e-166	7.50222e-169	B
ECSE_1475	paaC	phenylacetate-CoA oxygenase	500	0	2	189	99.6016	100	4.48867e-171	1.04281e-166	7.50222e-169	B
ECSE_1476	paaD	phenylacetate-CoA oxygenase	500	0	2	189	99.6016	100	4.48867e-171	1.04281e-166	7.50222e-169	B
ECSE_1477	paaE	1,2-phenylacetyl-CoA epoxidase subunit E	500	0	2	189	99.6016	100	4.48867e-171	1.04281e-166	7.50222e-169
ECSE_1478	paaF	2,3-dehydroadipyl-CoA hydratase	499	0	3	189	99.4024	100	2.87275e-169	6.67398e-165	4.30579e-167	B
ECSE_1479	paaG	1,2-epoxyphenylacetyl-CoA isomerase	500	0	2	189	99.6016	100	4.48867e-171	1.04281e-166	7.50222e-169	B
ECSE_1480	paaH	3-hydroxyadipyl-CoA dehydrogenase	501	0	1	189	99.8008	100	4.70018e-173	1.09195e-168	1.01106e-170	B
ECSE_1481	paaI	hydroxyphenylacetyl-CoA thioesterase	501	0	1	189	99.8008	100	4.70018e-173	1.09195e-168	1.01106e-170	B
ECSE_1482	paaJ	3-oxoadipyl-CoA/3-oxo-5,6-dehydrosuberyl-CoA thiolase	501	0	1	189	99.8008	100	4.70018e-173	1.09195e-168	1.01106e-170	B
ECSE_1483	paaK	phenylacetyl-CoA ligase	501	0	1	189	99.8008	100	4.70018e-173	1.09195e-168	1.01106e-170	B
ECSE_1484	paaX	transcriptional regulator	501	0	1	189	99.8008	100	4.70018e-173	1.09195e-168	1.01106e-170
ECSE_1487	ydbD	hypothetical protein	458	0	44	189	91.2351	100	1.76956e-127	4.11103e-123	1.05682e-125
ECSE_1520	hicB	antitoxin for the HicAB toxin-antitoxin system	502	0	0	189	100	100	2.47378e-175	5.74709e-171	6.4574e-173	B
ECSE_1532	curA	curcumin/dihydrocurcumin reductase	502	0	0	189	100	100	2.47378e-175	5.74709e-171	6.4574e-173
ECSE_1541	rhsC	type IV secretion protein Rhs	467	0	35	189	93.0279	100	2.63003e-134	6.11007e-130	1.67399e-132
ECSE_1560	yddL	lipoprotein	485	1	17	188	96.6135	99.4709	3.40919e-148	7.92023e-144	2.83879e-146
ECSE_1573	ddpF	D,D-dipeptide ABC transporter ATPase	502	0	0	189	100	100	2.47378e-175	5.74709e-171	6.4574e-173
ECSE_1574	ddpD	D,D-dipeptide ABC transporter ATPase	502	0	0	189	100	100	2.47378e-175	5.74709e-171	6.4574e-173
ECSE_1575	ddpC	D,D-dipeptide ABC transporter permease	502	0	0	189	100	100	2.47378e-175	5.74709e-171	6.4574e-173
ECSE_1576	ddpB	D,D-dipeptide ABC transporter permease	501	0	1	189	99.8008	100	4.70018e-173	1.09195e-168	1.01106e-170
ECSE_1578	ddpX	D-ala-D-ala dipeptidase	502	0	0	189	100	100	2.47378e-175	5.74709e-171	6.4574e-173
ECSE_1580	dosC	diguanylate cyclase	502	0	0	189	100	100	2.47378e-175	5.74709e-171	6.4574e-173
ECSE_1601	lsrK	autotransporter protein	496	0	6	189	98.8048	100	1.74788e-164	4.06066e-160	2.126e-162
ECSE_1602	lsrR	lsr operon transcriptional repressor	494	0	8	189	98.4064	100	1.20516e-161	2.79983e-157	1.30833e-159
ECSE_1603	lsrA	autoinducer 2 import ATP-binding protein	496	1	6	188	98.8048	99.4709	8.42019e-162	1.95618e-157	9.4047e-160
ECSE_1605	lsrD	autoinducer 2 import system permease protein	498	1	4	188	99.2032	99.4709	6.77359e-165	1.57364e-160	8.32614e-163
ECSE_1606	lsrB	autoinducer 2-binding protein	500	1	2	188	99.6016	99.4709	2.22532e-168	5.16988e-164	3.31402e-166
ECSE_1607	lsrF	autoinducer-2 aldolase	502	1	0	188	100	99.4709	1.24431e-172	2.89078e-168	2.38908e-170
ECSE_1608	lsrG	autoinducer-2 degrading protein LsrG	497	1	5	188	99.004	99.4709	2.60939e-163	6.06214e-159	2.95714e-161
ECSE_1617	yneK	hypothetical protein	500	0	2	189	99.6016	100	4.48867e-171	1.04281e-166	7.50222e-169
ECSE_1632	ydeI	hydrogen peroxide resistance OB fold protein	497	1	5	188	99.004	99.4709	2.60939e-163	6.06214e-159	2.95714e-161
ECSE_1633	ydeJ	inactive PncC family protein	502	0	0	189	100	100	2.47378e-175	5.74709e-171	6.4574e-173
ECSE_1756		hypothetical protein	483	2	19	187	96.2151	98.9418	9.32549e-144	2.1665e-139	6.6457e-142
ECSE_1776	lhr	ATP-dependent helicase	502	3	0	186	100	98.4127	5.27837e-168	1.22627e-163	7.66419e-166
ECSE_1899	ydjO	hypothetical protein	494	0	8	189	98.4064	100	1.20516e-161	2.79983e-157	1.30833e-159
ECSE_1933	ynjI	hypothetical protein	484	0	18	189	96.4143	100	8.79099e-150	2.04232e-145	7.42662e-148
ECSE_1973	dmlR	transcriptional activator of dmlA	501	0	1	189	99.8008	100	4.70018e-173	1.09195e-168	1.01106e-170
ECSE_1974	dmlA	D-malate oxidase	500	0	2	189	99.6016	100	4.48867e-171	1.04281e-166	7.50222e-169
ECSE_1975	yeaV	transporter	502	0	0	189	100	100	2.47378e-175	5.74709e-171	6.4574e-173
ECSE_1976	yeaW	dioxygenase alpha subunit	502	0	0	189	100	100	2.47378e-175	5.74709e-171	6.4574e-173
ECSE_1977	yeaX	putative diogenase beta subunit	502	0	0	189	100	100	2.47378e-175	5.74709e-171	6.4574e-173
ECSE_2112	yecT	hypothetical protein	498	0	4	189	99.2032	100	1.3861e-167	3.22019e-163	1.86138e-165
ECSE_2120	tap	methyl-accepting chemotaxis protein IV	502	0	0	189	100	100	2.47378e-175	5.74709e-171	6.4574e-173
ECSE_2285	yeeD	TusA family sulfurtransferase	493	10	9	179	98.2072	94.709	4.30358e-140	9.99808e-136	2.83232e-138
ECSE_2286	yeeE	inner membrane protein	493	10	9	179	98.2072	94.709	4.30358e-140	9.99808e-136	2.83232e-138
ECSE_2354		transcriptional regulator	474	7	28	182	94.4223	96.2963	1.47096e-125	3.41732e-121	8.43784e-124
ECSE_2355		plasmid stabilization system protein	474	4	28	185	94.4223	97.8836	4.26801e-131	9.91543e-127	2.68711e-129
ECSE_2648	yfcV	fimbrial-like adhesin protein	501	0	1	189	99.8008	100	4.70018e-173	1.09195e-168	1.01106e-170	B
ECSE_2654	yfdF	hypothetical protein	452	0	50	189	90.0398	100	2.70587e-123	6.28629e-119	1.5258e-121
ECSE_2717	murR	transcriptional regulator MurR	502	0	0	189	100	100	2.47378e-175	5.74709e-171	6.4574e-173
ECSE_2720	yfeW	penicillin binding protein PBP4B	502	0	0	189	100	100	2.47378e-175	5.74709e-171	6.4574e-173
ECSE_2758	mvpA	plasmid maintenance protein	501	13	1	176	99.8008	93.1217	1.05485e-147	2.45064e-143	8.6595e-146
ECSE_2759	mvpT	post-segregational killing toxin	501	13	1	176	99.8008	93.1217	1.05485e-147	2.45064e-143	8.6595e-146
ECSE_2765	hyfA	hydrogenase 4 Fe-S subunit	502	0	0	189	100	100	2.47378e-175	5.74709e-171	6.4574e-173
ECSE_2766	hyfB	hydrogenase 4 membrane subunit	502	0	0	189	100	100	2.47378e-175	5.74709e-171	6.4574e-173
ECSE_2767	hyfC	hydrogenase 4 membrane subunit	500	0	2	189	99.6016	100	4.48867e-171	1.04281e-166	7.50222e-169
ECSE_2769	hyfD	hydrogenase 4 membrane subunit	500	0	2	189	99.6016	100	4.48867e-171	1.04281e-166	7.50222e-169
ECSE_2770	hyfE	hydrogenase 4 membrane subunit	499	0	3	189	99.4024	100	2.87275e-169	6.67398e-165	4.30579e-167
ECSE_2771	hyfF	hydrogenase 4 membrane subunit	502	0	0	189	100	100	2.47378e-175	5.74709e-171	6.4574e-173
ECSE_2774	hyfI	hydrogenase 4 Fe-S subunit	502	0	0	189	100	100	2.47378e-175	5.74709e-171	6.4574e-173
ECSE_2775	hyfJ	processing element hydrogenase 4	502	0	0	189	100	100	2.47378e-175	5.74709e-171	6.4574e-173
ECSE_2776	hyfR	transcriptional activator HyfR	502	0	0	189	100	100	2.47378e-175	5.74709e-171	6.4574e-173
ECSE_2777	focB	formate transporter	502	0	0	189	100	100	2.47378e-175	5.74709e-171	6.4574e-173
ECSE_2796	yfgJ	hypothetical protein	502	0	0	189	100	100	2.47378e-175	5.74709e-171	6.4574e-173
ECSE_2824	hcaR	hca operon transcriptional regulator	502	0	0	189	100	100	2.47378e-175	5.74709e-171	6.4574e-173
ECSE_2825	hcaE	3-phenylpropionate dioxygenase large subunit	502	0	0	189	100	100	2.47378e-175	5.74709e-171	6.4574e-173
ECSE_2826	hcaF	3-phenylpropionate dioxygenase small subunit	502	0	0	189	100	100	2.47378e-175	5.74709e-171	6.4574e-173
ECSE_2827	hcaC	3-phenylpropionate dioxygenase ferredoxin subunit	502	0	0	189	100	100	2.47378e-175	5.74709e-171	6.4574e-173
ECSE_2828	hcaB	2,3-dihydroxy-2,3-dihydrophenylpropionate dehydrogenase	502	0	0	189	100	100	2.47378e-175	5.74709e-171	6.4574e-173
ECSE_2829	hcaD	phenylpropionate dioxygenase ferredoxin reductase subunit	502	0	0	189	100	100	2.47378e-175	5.74709e-171	6.4574e-173
ECSE_2910	ygaR	alpha-amylase	476	0	26	189	94.8207	100	5.5852e-142	1.29755e-137	3.79402e-140
ECSE_2989	kpdD	hypothetical protein	481	1	21	188	95.8167	99.4709	4.36368e-144	1.01377e-139	3.18796e-142
ECSE_2990	kpdC	4-hydroxybenzoate decarboxylase	483	1	19	188	96.2151	99.4709	4.23332e-146	9.83485e-142	3.23515e-144
ECSE_2991	kpdB	phenylacrylic acid decarboxylase	481	1	21	188	95.8167	99.4709	4.36368e-144	1.01377e-139	3.18796e-142
ECSE_2992	hosA	transcriptional regulator	482	1	20	188	96.0159	99.4709	4.39361e-145	1.02072e-140	3.29266e-143
ECSE_3010	ygbT	CRISPR-associated protein Cas1	476	4	26	185	94.8207	97.8836	7.26551e-133	1.68792e-128	4.58675e-131
ECSE_3011	casE	CRISPR-associated protein Cas6/Cse3/CasE	465	1	37	188	92.6295	99.4709	3.91443e-130	9.094e-126	2.44462e-128
ECSE_3012		hypothetical protein	464	1	38	188	92.4303	99.4709	2.32309e-129	5.397e-125	1.4392e-127
ECSE_3013	casC	CRISPR-associated protein Cas7/Cse4/CasC	469	2	33	187	93.4263	98.9418	5.02622e-131	1.16769e-126	3.15592e-129
ECSE_3014		transposase	459	1	43	188	91.4343	99.4709	1.25287e-125	2.91068e-121	7.24049e-124
ECSE_3015	casA	CRISPR-associated protein CasA/Cse1	459	1	43	188	91.4343	99.4709	1.25287e-125	2.91068e-121	7.24049e-124
ECSE_3103	yqeH	LuxR family transcriptional regulator	498	0	4	189	99.2032	100	1.3861e-167	3.22019e-163	1.86138e-165
ECSE_3106		hypothetical protein	454	0	48	189	90.4382	100	1.16546e-124	2.70761e-120	6.63629e-123
ECSE_3107	yqeK	hypothetical protein	456	0	46	189	90.8367	100	4.70086e-126	1.0921e-121	2.75784e-124
ECSE_3110	ygeH	transcriptional regulator	461	0	41	189	91.8327	100	1.1261e-129	2.61617e-125	6.9951e-128
ECSE_3114		helix-turn-helix transcriptional regulator	462	0	40	189	92.0319	100	2.0074e-130	4.6636e-126	1.25703e-128
ECSE_3119	eprJ	type III secretion protein EprJ	475	0	27	189	94.6215	100	4.46816e-141	1.03804e-136	3.01757e-139
ECSE_3124	epaR	type III secretion protein EpaR	458	0	44	189	91.2351	100	1.76956e-127	4.11103e-123	1.05682e-125
ECSE_3125	epaQ	type III secretion protein EpaQ	457	0	45	189	91.0359	100	9.20169e-127	2.13774e-122	5.46736e-125
ECSE_3127	epaO	type III secretion protein EpaO	480	0	22	189	95.6175	100	9.64547e-146	2.24084e-141	7.27544e-144
ECSE_3128	ygeP	hypothetical protein	497	0	5	189	99.004	100	5.37808e-166	1.24944e-161	7.13963e-164
ECSE_3165	ygfF	NAD(P)-dependent oxidoreductase	498	0	4	189	99.2032	100	1.3861e-167	3.22019e-163	1.86138e-165	B
ECSE_3180	argK	membrane ATPase/protein kinase	502	0	0	189	100	100	2.47378e-175	5.74709e-171	6.4574e-173
ECSE_3181	scpB	methylmalonyl-CoA decarboxylase	502	0	0	189	100	100	2.47378e-175	5.74709e-171	6.4574e-173
ECSE_3324	ygiL	fimbrial-like adhesin protein	496	4	6	185	98.8048	97.8836	3.96595e-155	9.2137e-151	3.6708e-153	B
ECSE_3325	ybgQ	outer membrane protein	501	4	1	185	99.8008	97.8836	1.23218e-163	2.86261e-159	1.41015e-161
ECSE_3327	yqiI	periplasmic pilin chaperone	501	4	1	185	99.8008	97.8836	1.23218e-163	2.86261e-159	1.41015e-161
ECSE_3375		minor pilin protein	501	15	1	174	99.8008	92.0635	1.31979e-144	3.06614e-140	9.70298e-143
ECSE_3376		outer membrane usher protein	501	15	1	174	99.8008	92.0635	1.31979e-144	3.06614e-140	9.70298e-143
ECSE_3378		fimbrial protein	488	15	14	174	97.2112	92.0635	2.46758e-126	5.73267e-122	1.45131e-124
ECSE_3390	yhaI	inner membrane protein	488	5	14	184	97.2112	97.3545	6.00512e-143	1.39511e-138	4.24045e-141
ECSE_3404	yhaB	hypothetical protein	458	4	44	185	91.2351	97.8836	1.42972e-118	3.32154e-114	7.77877e-117
ECSE_3428	yraH	fimbrial-like adhesin protein	499	4	3	185	99.4024	97.8836	7.10635e-160	1.65095e-155	7.20938e-158	B
ECSE_3429	yraI	periplasmic pilin chaperone	500	4	2	185	99.6016	97.8836	1.14301e-161	2.65545e-157	1.27055e-159	B
ECSE_3430	fimD	outer membrane usher protein FimD	502	4	0	185	100	97.8836	6.67714e-166	1.55123e-161	8.43061e-164	B
ECSE_3431	yraK	fimbrial-like adhesin protein	502	4	0	185	100	97.8836	6.67714e-166	1.55123e-161	8.43061e-164	B
ECSE_3506	dcuD	transporter	502	1	0	188	100	99.4709	1.24431e-172	2.89078e-168	2.38908e-170
ECSE_3597	hopD	leader peptidase HopD	484	1	18	188	96.4143	99.4709	3.89364e-147	9.04571e-143	3.09785e-145
ECSE_3754	yhiJ	hypothetical protein	501	0	1	189	99.8008	100	4.70018e-173	1.09195e-168	1.01106e-170
ECSE_3755	yheL	hypothetical protein	479	0	23	189	95.4183	100	8.89061e-145	2.06547e-140	6.59893e-143
ECSE_3767	arsR	arsenical resistance operon transcriptional repressor	502	2	0	187	100	98.9418	3.13567e-170	7.28478e-166	4.82436e-168
ECSE_3768	arsB	arylsulfatase	502	2	0	187	100	98.9418	3.13567e-170	7.28478e-166	4.82436e-168
ECSE_3770		transcriptional regulator	488	1	14	188	97.2112	99.4709	1.6485e-151	3.8298e-147	1.42903e-149
ECSE_3771		hypothetical protein	490	1	12	188	97.6096	99.4709	7.41952e-154	1.7237e-149	6.52918e-152
ECSE_3853	yiaM	2,3-diketo-L-gulonate TRAP transporter small permease protein	498	0	4	189	99.2032	100	1.3861e-167	3.22019e-163	1.86138e-165
ECSE_3860	yiaT	outer membrane protein	502	1	0	188	100	99.4709	1.24431e-172	2.89078e-168	2.38908e-170
ECSE_3861	yiaU	transcriptional regulator	502	0	0	189	100	100	2.47378e-175	5.74709e-171	6.4574e-173	B
ECSE_3883		hypothetical protein	494	0	8	189	98.4064	100	1.20516e-161	2.79983e-157	1.30833e-159
ECSE_3935		hypothetical protein	457	1	45	188	91.0359	99.4709	3.40569e-124	7.91209e-120	1.92978e-122
ECSE_3942	setB	lactose/glucose efflux system	498	0	4	189	99.2032	100	1.3861e-167	3.22019e-163	1.86138e-165
ECSE_3963	yidI	inner membrane protein	495	0	7	189	98.6056	100	4.89405e-163	1.13699e-158	5.49269e-161
ECSE_3968	glvG	6-phospho-alpha-glucosidase	502	0	0	189	100	100	2.47378e-175	5.74709e-171	6.4574e-173
ECSE_3969	glvC	PTS system arbutin-like IIC component	502	0	0	189	100	100	2.47378e-175	5.74709e-171	6.4574e-173
ECSE_3970	yidP	GntR family transcriptional regulator	502	0	0	189	100	100	2.47378e-175	5.74709e-171	6.4574e-173
ECSE_3982	yidX	lipoprotein	481	0	21	189	95.8167	100	1.00569e-146	2.33642e-142	7.84032e-145
ECSE_4015	lpfD	fimbrial protein	473	0	29	189	94.2231	100	2.60309e-139	6.04749e-135	1.69873e-137
ECSE_4016	fimD	outer membrane usher protein FimD	484	0	18	189	96.4143	100	8.79099e-150	2.04232e-145	7.42662e-148
ECSE_4017	lfpB	chaperone	484	0	18	189	96.4143	100	8.79099e-150	2.04232e-145	7.42662e-148
ECSE_4018	lpfA	type 1 fimbrial protein	482	0	20	189	96.0159	100	1.00569e-147	2.33642e-143	8.31465e-146
ECSE_4059	yifO	hypothetical protein	498	0	4	189	99.2032	100	1.3861e-167	3.22019e-163	1.86138e-165
ECSE_4302	espL	T3SS secreted effector EspL	499	0	3	189	99.4024	100	2.87275e-169	6.67398e-165	4.30579e-167
ECSE_4310		hypothetical protein	472	0	30	189	94.0239	100	1.90025e-138	4.41467e-134	1.22971e-136
ECSE_4311		hypothetical protein	468	0	34	189	93.2271	100	4.10941e-135	9.54699e-131	2.63003e-133
ECSE_4312		hypothetical protein	467	0	35	189	93.0279	100	2.63003e-134	6.11007e-130	1.67399e-132
ECSE_4322	xylE	D-xylose transporter	502	0	0	189	100	100	2.47378e-175	5.74709e-171	6.4574e-173	B
ECSE_4330	yjbI	hypothetical protein	483	0	19	189	96.2151	100	9.62382e-149	2.2358e-144	8.04246e-147
ECSE_4340	yjbM	hypothetical protein	483	0	19	189	96.2151	100	9.62382e-149	2.2358e-144	8.04246e-147
ECSE_4361	yjcF	hypothetical protein	501	0	1	189	99.8008	100	4.70018e-173	1.09195e-168	1.01106e-170
ECSE_4418	melB	melibiose:sodium symporter	501	0	1	189	99.8008	100	4.70018e-173	1.09195e-168	1.01106e-170	B
ECSE_4620	hpaC	4-hydroxyphenylacetate 3-monooxygenase	478	0	24	189	95.2191	100	7.89041e-144	1.8331e-139	5.65772e-142
ECSE_4621	hpaB	4-hydroxyphenylacetic hydroxylase	478	0	24	189	95.2191	100	7.89041e-144	1.8331e-139	5.65772e-142
ECSE_4622	hpaA	regulator of the 4HPA-hydroxylase operon	477	0	25	189	95.0199	100	6.75419e-143	1.56913e-138	4.68398e-141
ECSE_4623	rhmT	L-rhamnonate transporter	477	0	25	189	95.0199	100	6.75419e-143	1.56913e-138	4.68398e-141
ECSE_4624		2-keto-3-deoxy-L-rhamnonate aldolase	478	0	24	189	95.2191	100	7.89041e-144	1.8331e-139	5.65772e-142
ECSE_4625	mhpD	2-keto-4-pentenoate hydratase	477	0	25	189	95.0199	100	6.75419e-143	1.56913e-138	4.68398e-141
ECSE_4626	hpaF	5-carboxymethyl-2-hydroxymuconate isomerase	478	0	24	189	95.2191	100	7.89041e-144	1.8331e-139	5.65772e-142
ECSE_4627	hpaD	homoprotocatechuate dyoxygenase	477	0	25	189	95.0199	100	6.75419e-143	1.56913e-138	4.68398e-141
ECSE_4628	hpaE	5-carboxy-2-hydroxymuconate semialdehyde dehydrogenase	478	0	24	189	95.2191	100	7.89041e-144	1.8331e-139	5.65772e-142
ECSE_4629	hpcE	2-hydroxyhepta-2,4-diene-1,7-dioate isomerase	478	0	24	189	95.2191	100	7.89041e-144	1.8331e-139	5.65772e-142
ECSE_4630	hpcR	homoprotocatechuate degradative operon repressor	477	0	25	189	95.0199	100	6.75419e-143	1.56913e-138	4.68398e-141
ECSF_0017		hypothetical protein	6	185	496	4	1.19522	2.1164	3.96595e-155	9.2137e-151	3.6708e-153
ECSF_0019		hypothetical protein	6	186	496	3	1.19522	1.5873	3.27489e-157	7.60823e-153	3.15694e-155
ECSF_0032		hypothetical protein	0	173	502	16	0	8.46561	2.51414e-145	5.84086e-141	1.89025e-143
ECSF_0054		CcdA-like protein	0	189	502	0	0	0	2.47378e-175	5.74709e-171	6.4574e-173
ECSF_0055	letB	CcdB-like protein	0	189	502	0	0	0	2.47378e-175	5.74709e-171	6.4574e-173
ECSF_0121		Hcp1 family type VI secretion system effector	1	181	501	8	0.199203	4.2328	4.76084e-156	1.10604e-151	4.47789e-154
ECSF_0267		NADH-dependent flavin oxidoreductase	1	187	501	2	0.199203	1.0582	5.87178e-168	1.36413e-163	8.42057e-166	H
ECSF_0268		hydrolase	1	183	501	6	0.199203	3.1746	1.04238e-159	2.42166e-155	1.03049e-157	H
ECSF_0269		transcriptional regulator	1	185	501	4	0.199203	2.1164	1.23218e-163	2.86261e-159	1.41015e-161	H
ECSF_0270	ycjZ	transcriptional regulator	5	187	497	2	0.996016	1.0582	6.34211e-161	1.4734e-156	6.75871e-159	H
ECSF_0271		aldo/keto reductase	5	187	497	2	0.996016	1.0582	6.34211e-161	1.4734e-156	6.75871e-159	H
ECSF_0272		aldo/keto reductases	5	187	497	2	0.996016	1.0582	6.34211e-161	1.4734e-156	6.75871e-159	H
ECSF_0353		hypothetical protein	1	187	501	2	0.199203	1.0582	5.87178e-168	1.36413e-163	8.42057e-166
ECSF_0486		hypothetical protein	0	184	502	5	0	2.6455	6.77062e-164	1.57295e-159	7.90427e-162
ECSF_0609		hypothetical protein	0	187	502	2	0	1.0582	3.13567e-170	7.28478e-166	4.82436e-168
ECSF_0610		hypothetical protein	0	187	502	2	0	1.0582	3.13567e-170	7.28478e-166	4.82436e-168
ECSF_0611		hypothetical protein	0	187	502	2	0	1.0582	3.13567e-170	7.28478e-166	4.82436e-168
ECSF_0612		integral membrane protenin	0	187	502	2	0	1.0582	3.13567e-170	7.28478e-166	4.82436e-168
ECSF_0613	yagE	2-keto-3-deoxy gluconate aldolase	0	182	502	7	0	3.7037	4.16831e-160	9.68383e-156	4.24729e-158
ECSF_0614		alcohol dehydrogenase	0	187	502	2	0	1.0582	3.13567e-170	7.28478e-166	4.82436e-168
ECSF_0615		inner membrane protein	0	187	502	2	0	1.0582	3.13567e-170	7.28478e-166	4.82436e-168
ECSF_0616	pdxA	4-hydroxythreonine-4-phosphate dehydrogenase 2	0	187	502	2	0	1.0582	3.13567e-170	7.28478e-166	4.82436e-168
ECSF_0617		transcriptional regulator	0	186	502	3	0	1.5873	5.27837e-168	1.22627e-163	7.66419e-166
ECSF_0665		hypothetical protein	0	181	502	8	0	4.2328	2.6573e-158	6.17344e-154	2.60483e-156
ECSF_1022		inner membrane protein	1	186	501	3	0.199203	1.5873	9.81223e-166	2.27958e-161	1.2322e-163
ECSF_1096		hypothetical protein	3	174	499	15	0.59761	7.93651	6.46161e-141	1.50116e-136	4.30132e-139
ECSF_1097	sitD	iron ABC transporter permease component	37	177	465	12	7.37052	6.34921	2.80431e-110	6.51497e-106	1.43502e-108
ECSF_1098	sitC	iron ABC transporter permease component	36	178	466	11	7.17131	5.82011	1.50015e-112	3.48515e-108	7.79675e-111
ECSF_1099	sitB	iron ABC transporter ATP-binding component	38	178	464	11	7.56972	5.82011	4.73019e-111	1.09892e-106	2.43124e-109
ECSF_1100	sitA	iron ABC transporter substrate binding component	38	178	464	11	7.56972	5.82011	4.73019e-111	1.09892e-106	2.43124e-109
ECSF_1141		TonB dependent outer membrane receptor	0	189	502	0	0	0	2.47378e-175	5.74709e-171	6.4574e-173	H
ECSF_1142	modD	molybdenum transport protein	0	189	502	0	0	0	2.47378e-175	5.74709e-171	6.4574e-173	H
ECSF_1143		methyltransferase	0	189	502	0	0	0	2.47378e-175	5.74709e-171	6.4574e-173	H
ECSF_1144	fecD	ferric citrate ABC transporter permease	0	189	502	0	0	0	2.47378e-175	5.74709e-171	6.4574e-173	H
ECSF_1146		ABC transporter ATP-binding protein	0	188	502	1	0	0.529101	1.24431e-172	2.89078e-168	2.38908e-170	H
ECSF_1246	yciQ	hypothetical protein	16	177	486	12	3.18725	6.34921	9.85076e-129	2.28853e-124	6.00664e-127
ECSF_1273	eefR	transcription regulatory protein	0	182	502	7	0	3.7037	4.16831e-160	9.68383e-156	4.24729e-158	H
ECSF_1274	eefA	multidrug-efflux transport protein precursor	0	189	502	0	0	0	2.47378e-175	5.74709e-171	6.4574e-173	H
ECSF_1275	acrB	multidrug efflux system protein	0	189	502	0	0	0	2.47378e-175	5.74709e-171	6.4574e-173	H
ECSF_1276	eefC	outer membrane channel protein	0	189	502	0	0	0	2.47378e-175	5.74709e-171	6.4574e-173	H
ECSF_1277	eefD	membrane transport protein	0	188	502	1	0	0.529101	1.24431e-172	2.89078e-168	2.38908e-170
ECSF_1318	yeaM	transcriptional regulator	9	183	493	6	1.79283	3.1746	4.15983e-147	9.66412e-143	3.26491e-145	H
ECSF_1319	hlyD	multidrug resistance efflux pump	8	182	494	7	1.59363	3.7037	1.35341e-146	3.14423e-142	1.05158e-144	H
ECSF_1320		multidrug efflux protein	9	181	493	8	1.79283	4.2328	1.69034e-143	3.92699e-139	1.19725e-141
ECSF_1327		iron transport protein	0	180	502	9	0	4.7619	1.50876e-156	3.50514e-152	1.44841e-154
ECSF_1338	entS	autotransporter	0	189	502	0	0	0	2.47378e-175	5.74709e-171	6.4574e-173
ECSF_1393		hypothetical protein	0	187	502	2	0	1.0582	3.13567e-170	7.28478e-166	4.82436e-168
ECSF_1718	insK	IS150 transposase A	2	180	500	9	0.398406	4.7619	2.3987e-152	5.57266e-148	2.09498e-150	H
ECSF_2126		L-rhamnonate transporter	19	188	483	1	3.78486	0.529101	4.23332e-146	9.83485e-142	3.23515e-144
ECSF_2127	rhmD	L-rhamnonate dehydratase	19	188	483	1	3.78486	0.529101	4.23332e-146	9.83485e-142	3.23515e-144
ECSF_2128	rhmR	transcriptional regulator for the rhm operon	19	187	483	2	3.78486	1.0582	9.32549e-144	2.1665e-139	6.6457e-142
ECSF_2210		fimbrial-like adhesin protein	21	185	481	4	4.18327	2.1164	1.49905e-137	3.48259e-133	9.64706e-136
ECSF_2211		fimbrial-like adhesin protein	1	184	501	5	0.199203	2.6455	1.24028e-161	2.88141e-157	1.34019e-159
ECSF_2215		fimbrial-like adhesin protein	1	185	501	4	0.199203	2.1164	1.23218e-163	2.86261e-159	1.41015e-161
ECSF_2353		adhesin	0	189	502	0	0	0	2.47378e-175	5.74709e-171	6.4574e-173	H
ECSF_2354		hypothetical protein	0	181	502	8	0	4.2328	2.6573e-158	6.17344e-154	2.60483e-156
ECSF_2525		transporter	0	189	502	0	0	0	2.47378e-175	5.74709e-171	6.4574e-173
ECSF_2535		lactamase	0	184	502	5	0	2.6455	6.77062e-164	1.57295e-159	7.90427e-162
ECSF_2536		NADPH-dependent FMN reductase	0	188	502	1	0	0.529101	1.24431e-172	2.89078e-168	2.38908e-170
ECSF_2629		cystathionine beta-lyase	48	171	454	18	9.56175	9.52381	2.56332e-94	5.9551e-90	1.13215e-92
ECSF_2732		serine protease	0	189	502	0	0	0	2.47378e-175	5.74709e-171	6.4574e-173	H
ECSF_2771	kpsF	arabinose-5-phosphate isomerase	1	178	501	11	0.199203	5.82011	6.31112e-151	1.4662e-146	5.43037e-149	H
ECSF_2772	kpsE	capsular polysaccharide transport system permease protein	1	180	501	9	0.199203	4.7619	2.68302e-154	6.23319e-150	2.39738e-152	H
ECSF_2773	kpsD	polysaccharide export outer membrane protein	1	180	501	9	0.199203	4.7619	2.68302e-154	6.23319e-150	2.39738e-152	H
ECSF_2774	kpsU	3-deoxy-manno-octulosonate cytidylyltransferase	1	178	501	11	0.199203	5.82011	6.31112e-151	1.4662e-146	5.43037e-149	H
ECSF_2776	kpsC	capsular polysaccharide export protein	1	180	501	9	0.199203	4.7619	2.68302e-154	6.23319e-150	2.39738e-152	H
ECSF_2783	kpsM	capsular polysaccharide transport system permease protein	1	174	501	15	0.199203	7.93651	1.31979e-144	3.06614e-140	9.70298e-143
ECSF_2845		GntR family transcriptional regulator	0	184	502	5	0	2.6455	6.77062e-164	1.57295e-159	7.90427e-162
ECSF_2846		fructuronate reductase	0	184	502	5	0	2.6455	6.77062e-164	1.57295e-159	7.90427e-162
ECSF_2847		zinc-binding dehydrogenase	0	185	502	4	0	2.1164	6.67714e-166	1.55123e-161	8.43061e-164
ECSF_2848		malate/L-lactate dehydrogenase-family protein	0	182	502	7	0	3.7037	4.16831e-160	9.68383e-156	4.24729e-158
ECSF_2849		C4-dicarboxylate ABC transporter substrate-binding	0	185	502	4	0	2.1164	6.67714e-166	1.55123e-161	8.43061e-164
ECSF_2850		C4-dicarboxylate ABC transporter permease	0	185	502	4	0	2.1164	6.67714e-166	1.55123e-161	8.43061e-164
ECSF_2851		C4-dicarboxylate transport system large permease component	0	185	502	4	0	2.1164	6.67714e-166	1.55123e-161	8.43061e-164
ECSF_2856	ygiS	ABC transporter substrate-binding protein	17	187	485	2	3.38645	1.0582	7.61439e-146	1.76898e-141	5.79992e-144
ECSF_2866	fitR	transcriptional regulator	1	183	501	6	0.199203	3.1746	1.04238e-159	2.42166e-155	1.03049e-157	H
ECSF_2867	fitE	ferrichrome-binding protein	1	183	501	6	0.199203	3.1746	1.04238e-159	2.42166e-155	1.03049e-157	H
ECSF_2868	fitD	permease of ferrichrome ABC transporter	1	182	501	7	0.199203	3.7037	7.52368e-158	1.7479e-153	7.34413e-156	H
ECSF_2869	fitC	permease of ferrichrome ABC transporter	1	183	501	6	0.199203	3.1746	1.04238e-159	2.42166e-155	1.03049e-157	H
ECSF_2870	fepC	ABC-type iron-siderophore transport system ATP-binding protein	1	183	501	6	0.199203	3.1746	1.04238e-159	2.42166e-155	1.03049e-157	H
ECSF_2871	fitA	ferrichrome iron receptor precursor	1	183	501	6	0.199203	3.1746	1.04238e-159	2.42166e-155	1.03049e-157	H
ECSF_2880		arylsulfate sulfotransferase	0	184	502	5	0	2.6455	6.77062e-164	1.57295e-159	7.90427e-162	H
ECSF_2881		thiol:disulfide interchange protein DsbA	0	184	502	5	0	2.6455	6.77062e-164	1.57295e-159	7.90427e-162	H
ECSF_2882		disulfide bond formation protein DsbB	0	184	502	5	0	2.6455	6.77062e-164	1.57295e-159	7.90427e-162	H
ECSF_3081		hypothetical protein	43	188	459	1	8.56574	0.529101	1.25287e-125	2.91068e-121	7.24049e-124
ECSF_3082		fructokinase	43	189	459	0	8.56574	0	3.34165e-128	7.76332e-124	2.01645e-126
ECSF_3083		carbohydrate ABC transport system permease	43	188	459	1	8.56574	0.529101	1.25287e-125	2.91068e-121	7.24049e-124
ECSF_3084		sugar uptake ABC transporter ATP-binding protein	43	188	459	1	8.56574	0.529101	1.25287e-125	2.91068e-121	7.24049e-124
ECSF_3085		sugar uptake ABC transporter periplasmicsolute-binding protein precursor	43	188	459	1	8.56574	0.529101	1.25287e-125	2.91068e-121	7.24049e-124
ECSF_3086	gatY	tagatose-bisphosphate aldolase	43	189	459	0	8.56574	0	3.34165e-128	7.76332e-124	2.01645e-126
ECSF_3087		transcriptional regulator	43	189	459	0	8.56574	0	3.34165e-128	7.76332e-124	2.01645e-126
ECSF_3088		sugar kinases	43	189	459	0	8.56574	0	3.34165e-128	7.76332e-124	2.01645e-126
ECSF_3147	gspB	general secretion pathway protein GspB	18	188	484	1	3.58566	0.529101	3.89364e-147	9.04571e-143	3.09785e-145
ECSF_3148	gspA	general secretion pathway protein GspA	18	188	484	1	3.58566	0.529101	3.89364e-147	9.04571e-143	3.09785e-145
ECSF_3149	gspC	general secretion pathway protein GspC	17	186	485	3	3.38645	1.5873	1.1356e-143	2.63824e-139	8.068e-142
ECSF_3150	gspD	general secretion pathway protein GspD	18	188	484	1	3.58566	0.529101	3.89364e-147	9.04571e-143	3.09785e-145
ECSF_3151	gspE	general secretion pathway protein GspE	18	188	484	1	3.58566	0.529101	3.89364e-147	9.04571e-143	3.09785e-145
ECSF_3152	gspF	general secretion pathway protein GspF	18	188	484	1	3.58566	0.529101	3.89364e-147	9.04571e-143	3.09785e-145
ECSF_3153	gspG	general secretion pathway protein GspG	18	187	484	2	3.58566	1.0582	8.63653e-145	2.00644e-140	6.43089e-143
ECSF_3154	gspH	general secretion pathway protein GspH	18	188	484	1	3.58566	0.529101	3.89364e-147	9.04571e-143	3.09785e-145
ECSF_3155	gspI	general secretion pathway protein GspI	18	188	484	1	3.58566	0.529101	3.89364e-147	9.04571e-143	3.09785e-145
ECSF_3156	gspJ	general secretion pathway protein GspJ	18	188	484	1	3.58566	0.529101	3.89364e-147	9.04571e-143	3.09785e-145
ECSF_3157	gspK	general secretion pathway protein GspK	18	186	484	3	3.58566	1.5873	1.27915e-142	2.97172e-138	8.71473e-141
ECSF_3158	gspL	general secretion pathway protein GspL	18	186	484	3	3.58566	1.5873	1.27915e-142	2.97172e-138	8.71473e-141
ECSF_3159	gspM	general secretion pathway protein GspM	18	186	484	3	3.58566	1.5873	1.27915e-142	2.97172e-138	8.71473e-141
ECSF_3160	gspO	type 4 prepilin-like proteins leader peptide processing enzyme	18	186	484	3	3.58566	1.5873	1.27915e-142	2.97172e-138	8.71473e-141
ECSF_3163	chiA	periplasmic endochitinase	18	185	484	4	3.58566	2.1164	1.42316e-140	3.30628e-136	9.4465e-139
ECSF_3326		hemin transporter	0	189	502	0	0	0	2.47378e-175	5.74709e-171	6.4574e-173	H
ECSF_3327		ligand-gated channel protein	0	189	502	0	0	0	2.47378e-175	5.74709e-171	6.4574e-173	H
ECSF_3329		ABC transporter substrate-binding protein	0	188	502	1	0	0.529101	1.24431e-172	2.89078e-168	2.38908e-170	H
ECSF_3330		coproporphyrinogen oxidase	0	189	502	0	0	0	2.47378e-175	5.74709e-171	6.4574e-173	H
ECSF_3331		heme utilization carrier protein	0	189	502	0	0	0	2.47378e-175	5.74709e-171	6.4574e-173	H
ECSF_3332		hypothetical protein	0	189	502	0	0	0	2.47378e-175	5.74709e-171	6.4574e-173
ECSF_3333	fecD	ferric citrate ABC transporter permease	0	188	502	1	0	0.529101	1.24431e-172	2.89078e-168	2.38908e-170	H
ECSF_3334		ATP-binding component of hemin transport system	0	189	502	0	0	0	2.47378e-175	5.74709e-171	6.4574e-173	H
ECSF_3412		hypothetical protein	0	186	502	3	0	1.5873	5.27837e-168	1.22627e-163	7.66419e-166
ECSF_3413		2,3-diketo-L-gulonate TRAP transporter small permease protein	0	185	502	4	0	2.1164	6.67714e-166	1.55123e-161	8.43061e-164
ECSF_3424		hypothetical protein	0	185	502	4	0	2.1164	6.67714e-166	1.55123e-161	8.43061e-164
ECSF_3437		hypothetical protein	0	188	502	1	0	0.529101	1.24431e-172	2.89078e-168	2.38908e-170
ECSF_3492		hypothetical protein	4	189	498	0	0.796813	0	1.3861e-167	3.22019e-163	1.86138e-165
ECSF_3493	yajF	fructokinase	4	188	498	1	0.796813	0.529101	6.77359e-165	1.57364e-160	8.32614e-163	H
ECSF_3494		fructose-bisphosphate aldolase class II	4	189	498	0	0.796813	0	1.3861e-167	3.22019e-163	1.86138e-165	H
ECSF_3495		fructose-bisphosphate aldolase class II	4	189	498	0	0.796813	0	1.3861e-167	3.22019e-163	1.86138e-165	H
ECSF_3496		PTS system fructose-specific IIC component	4	189	498	0	0.796813	0	1.3861e-167	3.22019e-163	1.86138e-165	H
ECSF_3497		PTS system fructose-specific IIB component	4	188	498	1	0.796813	0.529101	6.77359e-165	1.57364e-160	8.32614e-163	H
ECSF_3498		enzyme IIA component of PTS	4	189	498	0	0.796813	0	1.3861e-167	3.22019e-163	1.86138e-165	H
ECSF_3499		transcriptional regulator	4	188	498	1	0.796813	0.529101	6.77359e-165	1.57364e-160	8.32614e-163
ECSF_3540		lipoprotein	21	189	481	0	4.18327	0	1.00569e-146	2.33642e-142	7.84032e-145
ECSF_3653		acetolactate synthase	27	189	475	0	5.37849	0	4.46816e-141	1.03804e-136	3.01757e-139	H
ECSF_3670		phosphosugar isomerase	0	187	502	2	0	1.0582	3.13567e-170	7.28478e-166	4.82436e-168
ECSF_3671		PTS system IIB component / IIC component	0	189	502	0	0	0	2.47378e-175	5.74709e-171	6.4574e-173
ECSF_3672	tktB	transketolase	0	189	502	0	0	0	2.47378e-175	5.74709e-171	6.4574e-173
ECSF_3673		transcriptional regulator	0	188	502	1	0	0.529101	1.24431e-172	2.89078e-168	2.38908e-170
ECSF_3674		transcriptional regulator	0	179	502	10	0	5.29101	7.72483e-155	1.79463e-150	6.98301e-153
ECSF_3675		cytosine permease	0	189	502	0	0	0	2.47378e-175	5.74709e-171	6.4574e-173
ECSF_3676		glutamyl-tRNA amidotransferase	0	189	502	0	0	0	2.47378e-175	5.74709e-171	6.4574e-173
ECSF_3677	yahG	hypothetical protein	0	189	502	0	0	0	2.47378e-175	5.74709e-171	6.4574e-173
ECSF_3679	yahF	hypothetical protein	0	188	502	1	0	0.529101	1.24431e-172	2.89078e-168	2.38908e-170
ECSF_3680	yahE	hypothetical protein	0	189	502	0	0	0	2.47378e-175	5.74709e-171	6.4574e-173
ECSF_3681		cysteine hydrolases superfamily protein	0	189	502	0	0	0	2.47378e-175	5.74709e-171	6.4574e-173
ECSF_3684		C4-dicarboxylate ABC transporter permease	0	179	502	10	0	5.29101	7.72483e-155	1.79463e-150	6.98301e-153
ECSF_3685		hypothetical protein	0	179	502	10	0	5.29101	7.72483e-155	1.79463e-150	6.98301e-153
ECSF_3686		ABC transporter substrate-binding protein	0	179	502	10	0	5.29101	7.72483e-155	1.79463e-150	6.98301e-153
ECSF_3687	dgoA	2-oxo-3-deoxygalactonate 6-phosphate aldolase	0	179	502	10	0	5.29101	7.72483e-155	1.79463e-150	6.98301e-153
ECSF_3688		2-keto-3-deoxy-galactonokinase	0	179	502	10	0	5.29101	7.72483e-155	1.79463e-150	6.98301e-153
ECSF_3689		transcriptional regulator	0	178	502	11	0	5.82011	3.60258e-153	8.36951e-149	3.15831e-151
ECSF_3743		hypothetical protein	1	181	501	8	0.199203	4.2328	4.76084e-156	1.10604e-151	4.47789e-154
ECSF_3761		glycoprotein	6	189	496	0	1.19522	0	1.74788e-164	4.06066e-160	2.126e-162
ECSF_3801		hypothetical protein	8	181	494	8	1.59363	4.2328	8.13579e-145	1.89011e-140	6.07751e-143
ECSF_3802		5'-nucleotidase	8	189	494	0	1.59363	0	1.20516e-161	2.79983e-157	1.30833e-159	H
ECSF_3824		aminobenzoyl-glutamate utilization protein A	0	189	502	0	0	0	2.47378e-175	5.74709e-171	6.4574e-173
ECSF_3825		MFS transporter	0	189	502	0	0	0	2.47378e-175	5.74709e-171	6.4574e-173
ECSF_3861	yjaA	stress-induced protein	15	187	487	2	2.98805	1.0582	5.04222e-148	1.17141e-143	4.1836e-146
ECSF_3916	sucA	2-oxoglutarate decarboxylase	0	189	502	0	0	0	2.47378e-175	5.74709e-171	6.4574e-173
ECSF_3917	sucB	2-oxoglutarate dehydrogenase E2 component (dihydrolipoamide succinyltransferase)	0	188	502	1	0	0.529101	1.24431e-172	2.89078e-168	2.38908e-170
ECSF_3918		dihydrolipoamide dehydrogenase	0	189	502	0	0	0	2.47378e-175	5.74709e-171	6.4574e-173
ECSF_3919	sucC	succinyl-CoA synthetase beta subunit	0	189	502	0	0	0	2.47378e-175	5.74709e-171	6.4574e-173
ECSF_3920	sucD	succinyl-CoA synthetase alpha subunit	0	187	502	2	0	1.0582	3.13567e-170	7.28478e-166	4.82436e-168
ECSF_3921		di-and tricarboxylate transporter	0	189	502	0	0	0	2.47378e-175	5.74709e-171	6.4574e-173
ECSF_3922		dehydrogenase	0	188	502	1	0	0.529101	1.24431e-172	2.89078e-168	2.38908e-170
ECSF_3923		response regulator in two-component system	0	189	502	0	0	0	2.47378e-175	5.74709e-171	6.4574e-173
ECSF_3924		sensory histidine kinase in two-component system	0	185	502	4	0	2.1164	6.67714e-166	1.55123e-161	8.43061e-164
ECSF_3937		transcriptional regulator	0	182	502	7	0	3.7037	4.16831e-160	9.68383e-156	4.24729e-158
ECSF_3938		hypothetical protein	0	182	502	7	0	3.7037	4.16831e-160	9.68383e-156	4.24729e-158
ECSF_3939		murein hydrolase effector protein LrgB	0	182	502	7	0	3.7037	4.16831e-160	9.68383e-156	4.24729e-158
ECSF_3953	yddO	ABC transporter ATP-binding protein	0	189	502	0	0	0	2.47378e-175	5.74709e-171	6.4574e-173
ECSF_3954	yddP	ABC transporter ATP-binding protein	0	189	502	0	0	0	2.47378e-175	5.74709e-171	6.4574e-173
ECSF_3955		D,D-dipeptide ABC transporter permease	0	189	502	0	0	0	2.47378e-175	5.74709e-171	6.4574e-173
ECSF_3956	yddR	ABC transporter permease	0	189	502	0	0	0	2.47378e-175	5.74709e-171	6.4574e-173
ECSF_3957		ABC-type dipeptide transport system periplasmic component	0	189	502	0	0	0	2.47378e-175	5.74709e-171	6.4574e-173
